# Supplementary material for: Analysis of zebrafish periderm enhancers facilitates identification of a regulatory variant near human KRT8/18
Source: eLife. 2020 Feb 7;9:e51325. doi: 10.7554/eLife.51325 (PMC7039683; doi:10.7554/eLife.51325)
Supplement: Figure 1—source data 1. [file elife-51325-fig1-data1.csv]

fo_24hpf_H3K27Ac	fo_GFP_A	no_24hpf_H3K27Ac	no_GFP_A
2.756767759	5.836148992	1.835513078	4.443033199
2.792591085	5.88968044	1.846705231	4.466549296
2.781599837	5.873804193	1.869466801	4.490945674
2.774882964	5.896193772	1.864688129	4.531690141
2.824343578	5.864441278	1.886192153	4.604753521
2.798697334	5.782210462	1.886569416	4.667002012
2.789130877	5.670669652	1.889210262	4.686619718
2.826786078	5.611439039	1.905181087	4.673792757
2.835741909	5.527783432	1.902540241	4.713908451
2.816405455	5.473437818	1.90555835	4.694416499
2.822511704	5.477915734	1.916876258	4.643737425
2.789537961	5.507632811	1.92806841	4.637198189
2.751475677	5.550783635	1.914864185	4.639210262
2.728475473	5.566863424	1.921403421	4.588531187
2.75188276	5.515163851	1.924547284	4.584255533
2.747201303	5.452880114	1.907570423	4.567655936
2.765520049	5.401791166	1.890090543	4.526911469
2.786281295	5.35965805	1.894869215	4.524899396
2.796458376	5.353958885	1.904049296	4.550427565
2.81701608	5.388153877	1.894240443	4.572937626
2.850803989	5.431304702	1.906815895	4.585261569
2.870140444	5.486668024	1.903546278	4.620095573
2.886220232	5.503561978	1.904803823	4.628269618
2.877264401	5.577040505	1.902665996	4.644114688
2.872786485	5.582332587	1.894743461	4.635186117
2.874211276	5.614695705	1.883802817	4.66084004
2.878892734	5.740891512	1.873868209	4.651785714
2.895786688	5.819662121	1.8722334	4.645497988
2.9198046	5.899450438	1.86028672	4.681463783
2.933238347	6.030938327	1.872610664	4.724220322
2.966619174	6.074496234	1.876760563	4.753269618
2.97618563	6.08894769	1.880784708	4.782193159
2.986362711	6.107877061	1.8777666	4.839285714
2.996539792	6.098310605	1.893988934	4.836519115
3.009362915	6.048239365	1.904049296	4.834004024
3.009159373	5.993079585	1.92806841	4.811368209
3.022186037	6.018318746	1.939009054	4.781061368
3.004274374	5.966822715	1.934481891	4.767731388
3.004681457	5.959291675	1.935236419	4.777917505
3.004274374	5.979442296	1.938380282	4.794391348
2.968247507	6.018522288	1.927816901	4.834129779
2.968451048	5.989008752	1.936242455	4.836141851
2.991858335	5.973132506	1.956866197	4.859280684
3.001628333	5.912477102	1.975855131	4.852615694
3.008141665	5.80948504	1.967429577	4.846453722
3.023203745	5.759006717	1.954099598	4.872484909
3.004274374	5.733564014	1.937877264	4.866825956
2.994097293	5.679421942	1.927691147	4.885060362
2.970282923	5.696519438	1.934104628	4.924673038
2.949114594	5.75188276	1.937751509	4.907947686
2.932220639	5.805414207	1.94554829	4.896629779
2.90474252	5.892937106	1.946302817	4.888204225
2.900671687	5.9599023	1.945296781	4.881287726
2.884795441	5.984530837	1.925301811	4.862047284
2.895786688	5.964380216	1.920648893	4.887072435
2.896804396	5.943822512	1.90555835	4.873113682
2.891308773	5.870547527	1.889964789	4.900779678
2.897618563	5.742112762	1.866197183	4.893988934
2.908813352	5.65540403	1.850603622	4.898390342
2.900061062	5.550987177	1.84305835	4.866448692
2.896804396	5.450437614	1.833752515	4.85110664
2.884184816	5.366171382	1.819290744	4.797535211
2.877264401	5.344799512	1.828596579	4.793636821
2.908202727	5.30571952	1.831866197	4.78860664
2.928760432	5.307958478	1.819039235	4.779300805
2.956035009	5.37838388	1.806589537	4.758299799
2.980867087	5.394463668	1.792630785	4.728873239
2.997761042	5.442092408	1.774144869	4.713405433
3.003663749	5.449012823	1.757796781	4.695045272
3.042540199	5.460004071	1.758299799	4.679200201
3.060858946	5.465906778	1.763078471	4.697434608
3.076531651	5.49379198	1.761695171	4.69693159
3.108487686	5.483818441	1.755658954	4.687877264
3.120496642	5.539181763	1.757419517	4.63304829
3.121717891	5.577447588	1.754778672	4.625125755
3.149806635	5.605943415	1.749496982	4.550050302
3.191125585	5.689802565	1.740694165	4.44554829
3.245267657	5.727661307	1.735789738	4.395623742
3.321392225	5.7594138	1.743209256	4.376760563
3.418278038	5.88968044	1.74195171	4.345950704
3.53002239	5.990433544	1.762826962	4.350855131
3.653775697	6.158151842	1.789738431	4.407696177
3.747608386	6.348463261	1.805331992	4.425427565
3.881945858	6.521066558	1.822434608	4.418762575
4.011398331	6.748422552	1.856136821	4.433853119
4.178506004	6.987583961	1.874245473	4.457746479
4.357012009	7.188683086	1.898013078	4.455985915
4.602483208	7.511907185	1.909834004	4.489310865
4.843883574	7.861591696	1.926810865	4.555206237
5.133523306	8.110930185	1.955105634	4.590669014
5.450234073	8.515774476	2.010940644	4.684104628
5.763688174	8.812334622	2.063380282	4.807721328
6.051292489	9.043761449	2.131413481	4.920020121
6.373905964	9.635456951	2.17555332	5.165618712
6.565031549	11.2987991	2.221076459	6.204979879
6.699369021	15.36454305	2.257042254	9.385689135
6.770812131	22.25788724	2.301810865	15.21541751
6.74190922	29.13616935	2.341800805	20.50050302
6.672501527	34.71463464	2.370347082	24.91310362
6.645634032	38.65825361	2.378521127	28.54854125
6.611235498	38.78546713	2.369592555	28.57997988
6.65031549	34.88296357	2.353370221	24.96969316
6.738449013	29.10543456	2.325452716	20.4847837
6.799918583	22.48809281	2.280809859	15.28282193
6.756157134	15.50763281	2.239562374	9.42831992
6.638917159	11.27478119	2.193410463	6.168008048
6.361693466	9.590067169	2.137575453	5.066524145
6.032770202	9.062283737	2.088405433	4.71805835
5.70425402	8.92611439	2.045397384	4.607268612
5.354162426	8.743334012	1.99195171	4.495221328
5.069000611	8.590677794	1.944039235	4.38418008
4.823732953	8.362914716	1.903420523	4.376509054
4.584775087	8.060655404	1.870975855	4.404552314
4.397923875	7.81579483	1.828848089	4.439889336
4.210054956	7.513942601	1.814009054	4.510186117
4.053327906	7.205984124	1.790367203	4.608526157
3.915326684	6.995929168	1.786846076	4.635940644
3.74313047	6.757785467	1.783827968	4.645372233
3.63036841	6.523101974	1.777162978	4.623868209
3.50620802	6.365153674	1.766725352	4.568661972
3.433136576	6.169753715	1.757293763	4.524019115
3.362304091	5.99124771	1.73277163	4.51194668
3.331772848	5.923875433	1.715040241	4.474471831
3.28699369	5.892530022	1.694290744	4.473968813
3.246692449	5.901485854	1.701207243	4.490316901
3.156930592	5.900264604	1.705105634	4.473843058
3.107877061	5.922654183	1.703973843	4.485915493
3.046203949	5.920822308	1.711141851	4.452087525
3.035619784	5.914919601	1.724974849	4.410085513
3.021778954	5.823936495	1.709004024	4.409205231
3.021982495	5.782821087	1.703848089	4.381916499
3.033584368	5.71300631	1.701961771	4.372484909
3.030938327	5.651740281	1.688506036	4.357645875
2.994097293	5.600040708	1.703596579	4.382293763
2.977203338	5.628536536	1.740694165	4.408199195
2.966619174	5.713820476	1.760060362	4.443536217
2.938530429	5.770405048	1.782318913	4.453093561
2.948503969	5.875839609	1.815392354	4.5
2.961937716	6.04640749	1.82193159	4.54917002
2.976796255	6.144311012	1.836141851	4.554828974
2.993486668	6.21677183	1.859280684	4.562374245
3.016079788	6.309993894	1.882042254	4.601232394
3.02381437	6.339507429	1.909959759	4.62889839
3.056584572	6.230205577	1.912349095	4.615316901
3.067982903	6.163443924	1.922912475	4.663229376
3.071646652	6.058416446	1.924295775	4.715165996
3.074496234	5.99124771	1.913229376	4.756287726
3.079177692	5.956442092	1.914361167	4.799295775
3.068186444	5.983106045	1.917882294	4.854627767
3.082637899	6.041522491	1.914864185	4.853998994
3.087929982	6.112965601	1.912726358	4.889084507
3.07388561	6.112558518	1.908199195	4.868963783
3.046000407	6.150213719	1.903294769	4.883928571
3.028292286	6.132709139	1.913983903	4.85777163
3.022796662	6.064522695	1.925301811	4.843687123
3.028902911	5.989415836	1.93360161	4.837273642
3.001831875	5.938326888	1.941775654	4.836519115
3.011194789	5.891105231	1.929074447	4.849974849
3.017708121	5.86586607	1.914235412	4.872359155
3.017911663	5.854467739	1.903294769	4.909582495
3.021168329	5.847547323	1.90694165	4.928948692
3.032159577	5.86342357	1.89751006	4.913732394
2.998168125	5.84083045	1.90165996	4.892982897
2.963973133	5.822715245	1.894114688	4.852741449
2.937716263	5.825157745	1.88304829	4.799044266
2.915530226	5.788113169	1.8777666	4.787474849
2.900061062	5.765316507	1.885689135	4.757419517
2.92611439	5.76063505	1.891851107	4.743963783
2.945450845	5.739466721	1.905935614	4.762701207
2.958070425	5.77813963	1.922409457	4.787726358
2.974150214	5.804396499	1.920900402	4.720447686
2.957663342	5.787299003	1.913732394	4.72334004
2.956035009	5.792998168	1.900528169	4.70082998
2.928963973	5.76938734	1.893988934	4.643988934
2.893547731	5.694687564	1.887072435	4.593938632
2.885609607	5.704050478	1.871856137	4.602238431
2.859556279	5.664563403	1.871478873	4.571805835
2.816201913	5.632403827	1.877012072	4.573189135
2.829025036	5.623447995	1.861167002	4.598465795
2.815184205	5.60777529	1.86167002	4.592429577
2.788927336	5.575819255	1.859657948	4.595699195
2.798493792	5.562792591	1.845573441	4.637826962
2.778343171	5.500915937	1.849471831	4.626131791
2.772440464	5.486057399	1.849974849	4.664486922
2.763688174	5.484225524	1.869089537	4.70611167
2.742519845	5.485446774	1.884305835	4.726232394
2.70547527	5.421331162	1.908702213	4.765719316
2.699165479	5.410950539	1.941146881	4.824069416
2.686952982	5.374109505	1.942404427	4.840165996
2.702625687	5.378180338	1.950704225	4.868209256
2.724608182	5.394056585	1.959381288	4.904678068
2.734785264	5.420924079	1.956866197	4.885186117
2.708528394	5.416242622	1.942152918	4.890090543
2.729696723	5.482190108	1.928697183	4.858651911
2.718501934	5.491145939	1.90832495	4.878395372
2.727457765	5.516385101	1.89222837	4.873742455
2.729493181	5.541013637	1.890719316	4.861418511
2.733156931	5.56889884	1.872359155	4.837022133
2.711988602	5.562181966	1.869969819	4.796151911
2.693059231	5.550376552	1.865065392	4.750125755
