# Supplementary material for: Analysis of zebrafish periderm enhancers facilitates identification of a regulatory variant near human KRT8/18
Source: eLife. 2020 Feb 7;9:e51325. doi: 10.7554/eLife.51325 (PMC7039683; doi:10.7554/eLife.51325)
Supplement: Figure 1—source data 2. [file elife-51325-fig1-data2.xlsx]

## Sheet: Sheet1
GFP ATAC FC4	GFP ATAC FC2	cluster 1	cluster 2	H3K4me1 cluster1	H3K4me1 cluster2	24hpf H3K27Ac cluster1	24hpf H3K27Ac cluseter2	80 H3K27Ac C1	80 H3K27Ac C2
59	97	118	17	118	10	98	27	119	25
