# Supplementary material for: Analysis of zebrafish periderm enhancers facilitates identification of a regulatory variant near human KRT8/18
Source: eLife. 2020 Feb 7;9:e51325. doi: 10.7554/eLife.51325 (PMC7039683; doi:10.7554/eLife.51325)
Supplement: Figure 1—source data 3. [file elife-51325-fig1-data3.csv]

ext_gene	nfrset	target_id	ens_gene	GFP_1	GFP_2	GFP_3	GFP_average	noGFP_1	noGFP_2	noGFP_3	noGFP_average	pval	qval	logq	b
aacs	non_periderm	ENSDART00000010101	ENSDARG00000012468	6.68768	6.26574	7.89277	6.94873	11.6456	10.2543	10.4584	10.7861	1.11E-06	8.17E-06	5.087777943	-0.360586157
aagab	non_periderm	ENSDART00000060344	ENSDARG00000041170	27.0476	28.8127	28.6951	28.18513333	33.3027	34.3951	31.5211	33.07296667	0.169622403	0.305065048	0.515607548	-0.083948457
aasdh	non_periderm	ENSDART00000036350	ENSDARG00000022730	0.142062	0.220377	0.194855	0.185764667	0.288391	0.253621	0.0900353	0.210682433	0.933269763	0.961276227	0.017151798	0.046575033
aatkb	periderm	ENSDART00000171682	ENSDARG00000104442	0.234155	0.128876	0.225657	0.196229333	0.206164	0.132163	0.188696	0.175674333	0.516928991	0.664343326	0.177607424	0.177819528
abca12	periderm	ENSDART00000138634	ENSDARG00000074749	0.223682	0.196138	0.338342	0.252720667	0.0670371	0.16366	0.143281	0.124659367	0.005634281	0.018590569	1.730707318	0.820952462
abca5	non_periderm	ENSDART00000155563	ENSDARG00000074041	2.93508	2.25946	3.12956	2.7747	3.4112	4.23065	3.26626	3.636036667	0.093106771	0.192260136	0.716110755	-0.187549713
abcb10	periderm	ENSDART00000088005	ENSDARG00000061591	6.62913	6.84165	6.70602	6.7256	2.89015	3.58867	2.30217	2.926996667	1.04E-14	1.93E-13	12.71444269	0.930712838
abcb11a	non_periderm	ENSDART00000139631	ENSDARG00000011573	0.327286	0.215377	0.102045	0.214902667	0.0429088	0.144057	0.193525	0.126830267	0.242456593	0.396236182	0.40204587	0.664221143
abcb7	non_periderm	ENSDART00000091169	ENSDARG00000062795	31.1965	34.5651	34.8577	33.53976667	30.5137	33.1151	33.6858	32.4382	0.019342421	0.053446794	1.272078341	0.114939816
abcd1	non_periderm	ENSDART00000111392	ENSDARG00000074876	0.25538	0.0821938	0.3134	0.216991267	0.565946	0.461999	0.776949	0.601631333	0.091559	0.18962484	0.722104773	-1.034243835
abcd3b	periderm	ENSDART00000005643	ENSDARG00000002947	1.62057	2.14028	2.52421	2.09502	1.27616	1.0337	1.12395	1.144603333	1.50E-05	9.08E-05	4.041914151	0.669740131
abcg1	non_periderm	ENSDART00000092809	ENSDARG00000063475	0.563584	0.701342	0.422845	0.562590333	0.980658	1.03915	0.811374	0.943727333	0.552663539	0.694329145	0.158434605	-0.446657323
abhd11	periderm	ENSDART00000101208	ENSDARG00000069501	5.95139	5.05077	6.41858	5.806913333	8.31171	8.98963	8.14602	8.482453333	0.01233977	0.036547839	1.437138297	-0.315087055
abhd3	non_periderm	ENSDART00000023851	ENSDARG00000018809	0.841817	0.895063	1.12305	0.95331	1.11023	1.14976	1.02899	1.096326667	0.558629148	0.699307551	0.155331782	-0.060130286
abi1a	periderm	ENSDART00000031245	ENSDARG00000010155	21.3516	20.5042	22.9942	21.61666667	27.6055	29.1095	28.184	28.29966667	0.002287742	0.008517414	2.069692243	-0.192020283
abl2	periderm	ENSDART00000138548	ENSDARG00000013841	1.99723	3.24878	2.43536	2.560456667	3.14575	2.12348	2.67384	2.64769	0.840586131	0.904188036	0.043741244	0.038001528
acaa1	non_periderm	ENSDART00000007997	ENSDARG00000004687	3.75937	2.57538	4.04603	3.46026	5.63481	3.96564	5.12411	4.908186667	0.112917074	0.223586481	0.650554459	-0.279221904
acaca	periderm	ENSDART00000083079	ENSDARG00000078512	1.02685	2.00102	1.81547	1.614446667	1.68866	1.49523	1.6177	1.60053	0.868777194	0.922502637	0.035032384	0.056114158
acer1	periderm	ENSDART00000136911	ENSDARG00000010347	2.75243	3.08645	1.83591	2.558263333	0.131901	0.0260217	0.116997	0.0916399	6.99E-13	1.10E-11	10.95860731	3.417403342
ache	non_periderm	ENSDART00000052989	ENSDARG00000031796	2.60394	2.07995	2.95475	2.546213333	1.24013	1.3248	1.04037	1.201766667	3.79E-14	6.64E-13	12.17783192	0.828881132
acp5a	periderm	ENSDART00000004716	ENSDARG00000019763	2.33524	2.73647	1.35446	2.142056667	1.77969	1.48404	1.55678	1.606836667	0.1896426	0.33120672	0.47990086	0.324504801
acsf2	periderm	ENSDART00000163931	ENSDARG00000061201	6.07543	6.34533	5.61984	6.013533333	7.82921	8.98922	8.18562	8.334683333	0.003013635	0.010850425	1.964553251	-0.243820255
acsl3a	periderm	ENSDART00000152222	ENSDARG00000032079	0.329615	0.348829	0.274654	0.317699333	0	0.286552	0.257118	0.181223333	0.233065013	0.385289725	0.414212573	1.437050471
acss3	periderm	ENSDART00000158316	ENSDARG00000032218	3.1915	4.27626	3.57088	3.679546667	4.3823	6.13938	4.7646	5.095426667	0.048705882	0.11436858	0.941693271	-0.240466947
acta2	periderm	ENSDART00000149990	ENSDARG00000045180	0.680268	0.325673	0.366221	0.457387333	0	0.530728	0.0757445	0.2021575	0.114165213	0.225606323	0.646648733	1.701412936
actc1a	non_periderm	ENSDART00000062370	ENSDARG00000042535	3601.91	3642.28	3811.65	3685.28	1132.11	1118.51	1130.56	1127.06	3.79E-209	2.93E-206	205.5331324	1.25680891
actn1	periderm	ENSDART00000140243	ENSDARG00000007219	43.7583	47.7401	53.0422	48.1802	13.4511	14.1914	15.3924	14.34496667	1.30E-150	5.93E-148	147.2269453	1.293843854
acvr2b	non_periderm	ENSDART00000019975	ENSDARG00000044422	22.389	22.7094	33.5419	26.21343333	67.1156	70.0535	73.1141	70.0944	7.38E-18	1.81E-16	15.74232143	-0.922559744
acy3.1	periderm	ENSDART00000052907	ENSDARG00000093003	1.45488	0.873971	1.40486	1.244570333	1.1939	0.726301	0.386794	0.768998333	0.081900332	0.17344402	0.760840669	0.622592657
acy3.2	periderm	ENSDART00000004233	ENSDARG00000005525	15.1921	15.6182	13.5953	14.80186667	8.10987	9.45666	9.37067	8.979066667	5.46E-12	7.89E-11	10.102923	0.577730301
acyp1	non_periderm	ENSDART00000150024	ENSDARG00000060126	4.26881	3.76981	4.82361	4.28741	9.58655	8.45486	9.78061	9.274006667	1.64E-10	2.03E-09	8.692503962	-0.697479265
adam10a	periderm	ENSDART00000099639	ENSDARG00000053468	22.5011	25.008	28.1279	25.21233333	24.0621	30.0267	24.2259	26.1049	0.449259277	0.60708133	0.216753123	0.050998086
adam15	periderm	ENSDART00000127753	ENSDARG00000089213	1.96951	2.05277	2.40036	2.14088	2.16117	2.48444	2.09138	2.245663333	0.650337772	0.772663933	0.11200936	0.037334403
adamts18	non_periderm	ENSDART00000004120	ENSDARG00000001999	1.84107	1.63403	1.74644	1.740513333	2.57241	3.53285	2.95504	3.0201	0.001808432	0.006906368	2.160750284	-0.457372031
adamts9	non_periderm	ENSDART00000109440	ENSDARG00000077778	0.787466	0.818298	0.875883	0.827215667	0.872054	0.95622	0.826115	0.884796333	0.844793346	0.906768962	0.042503354	0.020248863
adamtsl7	periderm	ENSDART00000148327	ENSDARG00000055439	1.03539	0.597209	0.776473	0.803024	0.972744	0.952954	1.09941	1.008369333	0.410721728	0.571263169	0.243163775	-0.169112722
adat2	periderm	ENSDART00000152885	ENSDARG00000041944	11.8628	13.2812	15.2619	13.46863333	11.7913	14.2475	12.3483	12.7957	0.061961099	0.138812195	0.857572378	0.129620388
adcy1a	non_periderm	ENSDART00000100098	ENSDARG00000069026	0.0337106	0.0447509	0.0379288	0.038796767	0.039192	0.0187274	0.00838701	0.022102137	0.512580471	0.660589621	0.180068254	0.686881384
adcyap1r1a	periderm	ENSDART00000160900	ENSDARG00000105201	0.75281	0.793297	0.744602	0.763569667	0.568882	0.810867	0.720273	0.700007333	0.116320692	0.228797329	0.64054905	0.183247461
add3a	non_periderm	ENSDART00000172496	ENSDARG00000040874	50.5845	50.0396	52.6206	51.08156667	48.214	50.3832	47.5045	48.70056667	0.004089926	0.014131477	1.849812444	0.130086948
adipor1b	periderm	ENSDART00000062682	ENSDARG00000042717	22.0409	20.0117	21.0212	21.0246	11.0239	12.5451	11.331	11.63333333	7.12E-23	2.48E-21	20.60554832	0.671398369
adka	non_periderm	ENSDART00000057605	ENSDARG00000039429	60.0729	55.4906	57.3269	57.63013333	54.3843	56.151	55.1669	55.23406667	0.0054413	0.018045779	1.743624366	0.123515253
adora2aa	periderm	ENSDART00000138750	ENSDARG00000033706	15.4829	15.7034	16.3826	15.8563	6.61971	7.61102	7.49756	7.242763333	3.09E-28	1.45E-26	25.838632	0.863483784
adpgk2	periderm	ENSDART00000091159	ENSDARG00000062785	2.77978	2.65303	3.38943	2.940746667	4.44342	4.4721	3.53587	4.150463333	0.00331611	0.011793999	1.928338913	-0.259998924
adrb2a	periderm	ENSDART00000167787	ENSDARG00000088124	0.664084	0.616153	1.01488	0.765039	0.285227	0.542643	0.384721	0.404197	0.000598703	0.002592964	2.586203513	0.728205315
adrbk2	periderm	ENSDART00000164610	ENSDARG00000104094	0.841813	1.17524	1.51274	1.176597667	3.02104	2.07085	2.15563	2.41584	0.000737977	0.003126436	2.504950457	-0.649098864
adssl1	periderm	ENSDART00000162819	ENSDARG00000099517	4.29939	3.65298	4.38599	4.112786667	2.87527	3.06906	2.83939	2.927906667	2.29E-06	1.60E-05	4.795880017	0.420858397
aga	non_periderm	ENSDART00000016728	ENSDARG00000004889	15.9293	19.2606	17.602	17.5973	17.9523	13.2265	16.4599	15.87956667	0.123432529	0.239442163	0.620799373	0.179620497
agpat4	periderm	ENSDART00000100156	ENSDARG00000069044	16.5239	14.4672	16.9823	15.99113333	13.7044	14.1683	13.0246	13.63243333	0.002562412	0.009403608	2.026705483	0.235854985
agps	non_periderm	ENSDART00000062850	ENSDARG00000042821	11.7224	12.9713	14.7797	13.1578	17.9896	18.8995	19.6247	18.83793333	3.20E-05	0.000182127	3.739625666	-0.28370952
agtpbp1	periderm	ENSDART00000159782	ENSDARG00000105214	0.770207	0.801005	1.38792	0.986377333	1.44954	1.16226	1.08331	1.231703333	0.369797067	0.533202758	0.273107613	-0.167703133
ahctf1	non_periderm	ENSDART00000155545	ENSDARG00000077530	7.24918	11.724	13.6311	10.86809333	16.9242	18.1934	15.4105	16.8427	0.02411737	0.064190416	1.19252981	-0.383665276
ahcy	periderm	ENSDART00000018523	ENSDARG00000005191	42.3786	39.8024	42.5623	41.5811	73.3756	63.9163	67.6561	68.316	1.03E-11	1.45E-10	9.838631998	-0.416702126
ahcyl1	periderm	ENSDART00000078795	ENSDARG00000056331	10.7307	12.3199	12.3818	11.8108	11.0789	11.3181	10.2616	10.8862	0.010952013	0.032982924	1.481710846	0.163668267
ahcyl2	non_periderm	ENSDART00000130453	ENSDARG00000039343	60.8884	61.2813	72.2475	64.80573333	75.8575	85.472	77.8337	79.72106667	0.00230548	0.0085747	2.066781066	-0.12729071
ahr2	periderm	ENSDART00000105762	ENSDARG00000021833	0.474782	0.622495	0.711147	0.602808	0.51153	0.639541	0.548166	0.566412333	0.297901619	0.458246834	0.338900527	0.138581091
aif1l	periderm	ENSDART00000009500	ENSDARG00000009336	55.3331	54.2083	56.0581	55.19983333	53.7001	57.2238	54.3998	55.1079	0.072634081	0.157732751	0.802078122	0.082182682
aig1	non_periderm	ENSDART00000138539	ENSDARG00000007171	0.249733	0.290728	0.0673719	0.202610967	0.213025	0.322097	0.38577	0.306964	0.551720423	0.693599368	0.158891311	-0.452807902
aimp1	non_periderm	ENSDART00000084184	ENSDARG00000060036	175.75	176.521	170.668	174.313	209.223	187.599	194.864	197.2286667	0.362773157	0.526557068	0.278554553	-0.052526206
ak3	non_periderm	ENSDART00000132995	ENSDARG00000058226	37.9684	37.8604	40.9749	38.93456667	37.7923	40.1291	42.9754	40.29893333	0.38351685	0.546990351	0.262020335	0.045058796
akap12b	non_periderm	ENSDART00000110883	ENSDARG00000055678	116.782	124.169	156.18	132.377	111.41	127.84	114.729	117.993	0.002434442	0.008989564	2.046261371	0.194534935
akap7	non_periderm	ENSDART00000131642	ENSDARG00000043843	2.88973	4.74512	6.93506	4.856636667	4.44586	4.78323	4.16318	4.46409	0.822012144	0.892375822	0.049452205	0.0579273
akap8l	non_periderm	ENSDART00000162466	ENSDARG00000099635	53.1807	55.6266	55.7637	54.857	83.8236	87.4301	81.8246	84.35943333	1.58E-15	3.17E-14	13.49894074	-0.349699867
akirin1	non_periderm	ENSDART00000058472	ENSDARG00000039969	290.214	280.979	270.466	280.553	312.19	303.596	303.527	306.4376667	0.724815614	0.82742472	0.082271508	-0.018643172
aktip	non_periderm	ENSDART00000146202	ENSDARG00000026862	88.1033	85.7037	94.0882	89.2984	63.1363	69.4991	71.2929	67.9761	3.59E-15	6.92E-14	13.15989391	0.352469972
alcama	non_periderm	ENSDART00000030138	ENSDARG00000026531	155.831	154.67	159.245	156.582	115.252	109.42	118.942	114.538	3.23E-19	8.75E-18	17.05799195	0.392755043
aldh1a2	non_periderm	ENSDART00000075519	ENSDARG00000053493	29.683	29.5406	30.6707	29.96476667	41.1981	43.8561	45.8753	43.64316667	1.82E-10	2.23E-09	8.651695137	-0.292149597
aldh3b1	periderm	ENSDART00000020017	ENSDARG00000013839	20.668	18.4423	19.4088	19.50636667	10.2149	10.3129	8.29006	9.605953333	3.22E-21	1.02E-19	18.99139983	0.790676211
aldh4a1	non_periderm	ENSDART00000055710	ENSDARG00000038207	9.69295	10.3385	10.6621	10.23118333	11.5448	11.9417	11.0676	11.51803333	0.557660229	0.698619786	0.155759119	-0.034376844
aldh8a1	non_periderm	ENSDART00000053399	ENSDARG00000036776	1.3162	1.44053	2.31786	1.69153	2.08699	1.42696	2.58634	2.03343	0.641547672	0.765848609	0.115857072	-0.109574873
aldoaa	non_periderm	ENSDART00000020741	ENSDARG00000011665	747.797	725.079	746.146	739.674	666.962	653.884	646.416	655.754	1.79E-07	1.50E-06	5.823908741	0.196584545
alg14	non_periderm	ENSDART00000164155	ENSDARG00000103093	20.5778	18.803	19.7891	19.7233	23.0374	24.0966	21.2046	22.77953333	0.364871289	0.528568374	0.276898826	-0.08311171
alg2	periderm	ENSDART00000103257	ENSDARG00000070399	17.64	17.2123	17.8108	17.55436667	14.4073	14.9415	14.7328	14.69386667	0.00012482	0.000629794	3.200801481	0.257167789
alg9	periderm	ENSDART00000005090	ENSDARG00000012840	13.7322	13.539	13.9472	13.73946667	10.9756	10.2601	10.3583	10.53133333	1.80E-06	1.28E-05	4.89279003	0.347445159
allc	non_periderm	ENSDART00000145992	ENSDARG00000042562	0.660495	0.748942	1.02276	0.810732333	1.20467	0.492829	0.191183	0.629560667	0.368829884	0.532224556	0.273905092	0.524763929
alox12	periderm	ENSDART00000101126	ENSDARG00000069463	19.4925	22.9413	25.6714	22.70173333	7.87848	7.98454	7.01226	7.625093333	2.95E-72	5.52E-70	69.25806092	1.169509029
als2a	non_periderm	ENSDART00000108844	ENSDARG00000075111	1.19933	0.994935	1.23453	1.142931667	1.31798	1.54915	1.52537	1.464166667	0.075564046	0.16279412	0.788361286	-0.162813862
alx4a	periderm	ENSDART00000124363	ENSDARG00000088332	1.1235	1.38482	1.69646	1.401593333	0.926211	0.864857	0.995914	0.928994	9.09E-05	0.00047274	3.325377649	0.482473728
amh	periderm	ENSDART00000013803	ENSDARG00000014357	0.453666	0.516929	0.435212	0.468602333	1.09406	1.51293	1.05635	1.221113333	1.97E-06	1.39E-05	4.8569852	-0.858398783
amotl2b	periderm	ENSDART00000145944	ENSDARG00000061948	62.0246	64.135	69.7018	65.28713333	32.859	33.5893	32.7256	33.05796667	1.31E-66	2.15E-64	63.66756154	0.761776542
ankdd1b	periderm	ENSDART00000036242	ENSDARG00000025866	0.43229	0.634119	0.544049	0.536819333	0.15452	0.834439	0.404663	0.464540667	0.386772786	0.550113925	0.259547362	0.407295196
ankhd1	periderm	ENSDART00000147947	ENSDARG00000077860	4.91064	5.16422	7.42952	5.834793333	6.80302	9.14675	7.15104	7.70027	0.112178672	0.222445954	0.652775489	-0.200044739
ankk1	periderm	ENSDART00000079504	ENSDARG00000056921	0.726754	0.437832	0.706077	0.623554333	0.0383538	0.0608934	0.109235	0.069494067	4.10E-06	2.75E-05	4.560667306	2.242090808
ankrd12	periderm	ENSDART00000074270	ENSDARG00000052419	35.531	37.5984	36.01	36.3798	34.4488	33.4863	35.1717	34.36893333	0.021166787	0.057611711	1.239489227	0.132741345
ankrd22	periderm	ENSDART00000028003	ENSDARG00000002298	5.08353	5.41584	6.65523	5.7182	4.04116	5.66439	4.20392	4.63649	0.046027464	0.109268052	0.961506799	0.281727816
ankrd54	periderm	ENSDART00000078137	ENSDARG00000055743	56.2862	57.921	57.7476	57.31826667	60.7915	59.02	57.2945	59.03533333	0.316029129	0.477590891	0.320943965	0.048397487
anp32a	non_periderm	ENSDART00000008785	ENSDARG00000006487	516.691	508.481	494.185	506.4523333	641.135	619.835	616.052	625.674	0.005617995	0.018543705	1.73180349	-0.13374315
anp32e	non_periderm	ENSDART00000077059	ENSDARG00000054804	208.301	203.618	208.576	206.8316667	286.339	290.449	274.433	283.7403333	3.33E-10	3.97E-09	8.401209493	-0.234886955
anxa11b	periderm	ENSDART00000023547	ENSDARG00000002632	38.2575	40.9423	45.4924	41.56406667	35.5035	44.1495	41.348	40.33366667	0.052448693	0.121341056	0.91599223	0.111252344
anxa1b	periderm	ENSDART00000158856	ENSDARG00000100095	40.4692	39.4033	41.5913	40.48793333	1.53136	0.801568	0.716378	1.016435333	0.000106919	0.000548093	3.261145745	3.809317646
anxa1c	periderm	ENSDART00000166183	ENSDARG00000104359	107.816	111.685	100.169	106.5566667	3.10745	2.3199	2.97674	2.801363333	1.14E-212	9.21E-210	209.0357404	3.709281272
anxa2a	periderm	ENSDART00000011967	ENSDARG00000003216	36.0789	36.6034	36.8087	36.497	3.67258	4.10315	3.42189	3.73254	1.09E-150	5.06E-148	147.2958495	2.356681441
anxa3a	periderm	ENSDART00000004286	ENSDARG00000009196	6.645	5.69151	6.25785	6.19812	2.30227	2.12628	3.2703	2.566283333	1.86E-10	2.28E-09	8.642065153	0.966738094
ap1m3	periderm	ENSDART00000057732	ENSDARG00000039512	1.89326	1.2537	2.29118	1.812713333	0.802128	0.755886	0.947197	0.835070333	4.52E-06	3.00E-05	4.522878745	0.826837347
ap2m1a	non_periderm	ENSDART00000046587	ENSDARG00000002790	238.083	247.31	226.213	237.202	247.706	240.197	242.827	243.5766667	0.3530973	0.517043629	0.286472809	0.052870491
ap4s1	periderm	ENSDART00000076409	ENSDARG00000054220	27.7897	29.459	26.3517	27.8668	36.4294	31.0952	32.077	33.20053333	0.18351444	0.32305776	0.490719823	-0.126955441
apaf1	periderm	ENSDART00000019165	ENSDARG00000021239	3.6094	3.64877	5.47233	4.2435	3.2799	3.23045	3.42046	3.31027	0.007332401	0.023404274	1.630704826	0.313477391
apip	periderm	ENSDART00000007487	ENSDARG00000003132	104.483	105.048	93.5727	101.0345667	131.796	119.883	124.229	125.3026667	0.036641016	0.090829727	1.041771991	-0.156941933
apln	non_periderm	ENSDART00000075312	ENSDARG00000053279	5.56631	5.59813	6.50523	5.88989	3.30864	3.3213	2.6289	3.08628	1.65E-20	4.97E-19	18.30364361	0.733357795
aplnrb	periderm	ENSDART00000129643	ENSDARG00000036670	9.85829	11.8649	12.198	11.30706333	11.8547	11.8502	11.1975	11.63413333	0.530287603	0.67611975	0.169976378	0.046942493
aplp2	non_periderm	ENSDART00000077125	ENSDARG00000054864	18.7735	20.9176	27.0106	22.2339	8.17018	9.515	8.45399	8.713056667	1.24E-33	7.47E-32	31.1266794	1.012095264
apnl	non_periderm	ENSDART00000130280	ENSDARG00000090900	0.108076	0.268321	0.182322	0.186239667	0	0	0	0	0.025981576	0.068168856	1.166413994	2.893334488
appa	periderm	ENSDART00000166786	ENSDARG00000104279	36.5681	36.1102	49.1989	40.62573333	51.4692	60.8616	48.7287	53.6865	0.024065402	0.064080836	1.193271831	-0.20457338
aqp3a	periderm	ENSDART00000009182	ENSDARG00000003808	1.49674	1.06766	1.18199	1.248796667	0.738325	0.591259	1.14101	0.823531333	0.025613464	0.067381745	1.171457746	0.516751009
arap3	non_periderm	ENSDART00000173056	ENSDARG00000076801	1.87269	2.62214	3.12582	2.540216667	2.94198	2.96245	2.47105	2.791826667	0.84502446	0.906935025	0.042423826	-0.026558155
arfgap3	periderm	ENSDART00000156692	ENSDARG00000097583	35.1165	35.3053	39.9982	36.80666667	15.0652	15.2298	14.47	14.92166667	3.54E-59	4.93E-57	56.30715308	0.979980853
arfgef1	non_periderm	ENSDART00000092783	ENSDARG00000063474	2.39865	2.46872	3.0063	2.624556667	2.6825	2.72385	1.80693	2.404426667	0.172590837	0.309014825	0.510020685	0.185451118
arfip2a	non_periderm	ENSDART00000133867	ENSDARG00000059244	3.95984	7.28724	7.84601	6.364363333	5.86761	7.02355	6.9976	6.629586667	0.997548651	0.99896252	0.000450806	-0.000617852
arfrp1	non_periderm	ENSDART00000128062	ENSDARG00000057857	45.8841	45.184	44.119	45.06236667	84.9235	93.6112	85.001	87.84523333	6.90E-23	2.41E-21	20.61798296	-0.604268024
arglu1a	non_periderm	ENSDART00000011910	ENSDARG00000019223	37.2935	35.3547	33.5185	35.3889	28.6698	28.5298	32.932	30.04386667	0.002682673	0.009788458	2.009285718	0.242894125
arhgap10	periderm	ENSDART00000109314	ENSDARG00000078326	8.88699	9.90239	10.7873	9.858893333	9.62094	10.1976	9.61959	9.81271	0.181652986	0.320693345	0.493910052	0.085603866
arhgap11a	non_periderm	ENSDART00000172408	ENSDARG00000100019	44.446	42.8966	48.8104	45.38433333	35.4254	35.7764	35.6323	35.61136667	6.33E-14	1.09E-12	11.9625735	0.324919896
arhgap15	non_periderm	ENSDART00000090052	ENSDARG00000062349	0.214443	0.169954	0.141307	0.175234667	0.170773	0.118746	0.0395932	0.109704067	0.269405404	0.427333537	0.369233023	0.656364438
arhgap21a	non_periderm	ENSDART00000166216	ENSDARG00000104295	3.75941	6.76175	4.94172	5.154293333	6.3053	7.01119	7.97349	7.09666	0.116006592	0.228383369	0.641335525	-0.296626775
arhgap21b	periderm	ENSDART00000091298	ENSDARG00000075673	17.2004	20.2751	26.1483	21.20793333	22.6934	25.5099	21.6233	23.27553333	0.843116276	0.905815211	0.042960391	-0.019599655
arhgap29b	non_periderm	ENSDART00000141921	ENSDARG00000017748	11.5953	8.97623	7.37582	9.315783333	9.1638	9.70063	7.27288	8.712436667	0.42384196	0.584195528	0.233441772	0.142986808
arhgap5	periderm	ENSDART00000156180	ENSDARG00000061294	6.54678	8.42698	11.8522	8.941986667	12.9825	16.9188	12.2524	14.05123333	0.019882792	0.054681133	1.262162495	-0.386049199
arhgdig	periderm	ENSDART00000019004	ENSDARG00000004034	12.1372	12.6285	13.3298	12.6985	5.22737	4.75366	5.42546	5.135496667	9.06E-35	5.77E-33	32.23882419	0.988060229
arhgef10	periderm	ENSDART00000150084	ENSDARG00000077788	50.9308	59.9399	47.7629	52.87786667	45.6989	53.7628	51.1943	50.21866667	0.538505199	0.68297472	0.165595371	0.089731612
arhgef16	non_periderm	ENSDART00000131137	ENSDARG00000077114	3.03421	2.87813	2.80693	2.906423333	2.0184	2.2481	2.01015	2.092216667	0.005564005	0.018392775	1.735352742	0.408698708
arhgef18a	periderm	ENSDART00000025841	ENSDARG00000011157	9.70766	10.0439	10.6764	10.14265333	13.8742	16.715	15.1293	15.2395	1.78E-08	1.69E-07	6.772113295	-0.320650508
arhgef19	non_periderm	ENSDART00000113598	ENSDARG00000078853	12.482	13.6959	15.6701	13.94933333	9.01473	9.37775	8.73118	9.04122	1.57E-21	5.09E-20	19.29328222	0.514854952
arhgef7a	non_periderm	ENSDART00000045093	ENSDARG00000006299	8.65253	9.06353	10.5173	9.41112	9.37178	11.2745	7.70486	9.45038	0.392235369	0.555112108	0.2556193	0.087935275
arid1ab	periderm	ENSDART00000164386	ENSDARG00000101891	8.22061	10.3964	15.1184	11.24513667	17.5573	19.3791	17.2904	18.0756	0.005004717	0.016806032	1.774534814	-0.419517443
arid4a	non_periderm	ENSDART00000103228	ENSDARG00000043873	43.2017	51.3374	49.4063	47.9818	48.7012	45.5853	40.9639	45.08346667	0.038550256	0.094614109	1.024044096	0.142018172
arl11	periderm	ENSDART00000053221	ENSDARG00000036637	6.66881	5.74219	6.63297	6.34799	6.06905	5.63473	6.88637	6.196716667	0.286817979	0.446403647	0.350272266	0.103598871
arl14	periderm	ENSDART00000092190	ENSDARG00000063223	0.449805	1.0285	0.62223	0.700178333	0.119623	0.279961	0.252985	0.217523	0.064233048	0.143034463	0.84455931	1.167535046
arl15a	non_periderm	ENSDART00000145679	ENSDARG00000076040	5.83723	6.75894	7.60731	6.734493333	8.0723	4.14466	7.15226	6.456406667	0.67473327	0.791169247	0.101730602	0.100956624
arl4aa	periderm	ENSDART00000163513	ENSDARG00000099918	55.3814	54.3304	55.4152	55.04233333	33.5488	34.7989	33.352	33.8999	4.81E-18	1.20E-16	15.92081875	0.55225025
arl4cb	periderm	ENSDART00000046423	ENSDARG00000032708	60.7342	62.821	59.8383	61.13116667	64.4658	63.2751	68.9461	65.56233333	0.874276086	0.925912091	0.033430245	0.008437233
arl4d	periderm	ENSDART00000066269	ENSDARG00000045074	26.0682	22.7471	24.0133	24.2762	22.3443	24.5979	22.2994	23.08053333	0.05335532	0.123054288	0.909903248	0.126033131
arl5a	non_periderm	ENSDART00000007392	ENSDARG00000018627	36.2637	36.8315	34.1942	35.76313333	34.6951	30.722	34.8284	33.41516667	0.055722012	0.127489386	0.89452597	0.141681267
arl8	non_periderm	ENSDART00000099121	ENSDARG00000094709	32.084	34.1564	37.5567	34.59903333	53.604	57.5285	54.2908	55.1411	6.07E-18	1.51E-16	15.82102305	-0.384732549
arnt	periderm	ENSDART00000029485	ENSDARG00000021855	4.80328	6.18312	7.21781	6.06807	3.83201	4.65177	2.76265	3.74881	0.000812101	0.003398819	2.468671963	0.567069911
arntl1b	non_periderm	ENSDART00000104523	ENSDARG00000035732	5.92844	6.15507	8.32401	6.802506667	17.8632	18.9483	14.3316	17.0477	2.36E-14	4.26E-13	12.3705904	-0.842198946
arpc1a	periderm	ENSDART00000014729	ENSDARG00000008383	145.701	153.926	146.396	148.6743333	120.353	121.92	124.187	122.1533333	3.93E-11	5.21E-10	9.283162277	0.273114257
arpc2	periderm	ENSDART00000099803	ENSDARG00000075989	386.719	370.977	357.033	371.5763333	281.537	275.64	272.688	276.6216667	2.25E-11	3.05E-10	9.515700161	0.367683405
arpc5a	periderm	ENSDART00000057174	ENSDARG00000039142	36.5169	35.5096	35.8	35.94216667	34.0258	34.4665	30.1709	32.88773333	0.000762098	0.00321867	2.492323548	0.173803375
arpp19a	periderm	ENSDART00000041597	ENSDARG00000032532	22.1037	21.748	26.3623	23.40466667	35.8738	40.0789	34.8997	36.9508	8.34E-17	1.85E-15	14.73282827	-0.374159297
arrdc2	periderm	ENSDART00000011362	ENSDARG00000020761	17.6984	16.3078	17.2302	17.0788	15.5043	16.1887	14.8954	15.52946667	0.003909124	0.013598878	1.866496922	0.176708408
asah1b	periderm	ENSDART00000040434	ENSDARG00000034817	3.65858	3.97395	4.43717	4.023233333	1.91478	2.66263	2.45626	2.344556667	3.87E-06	2.60E-05	4.585026652	0.621538999
asap2a	non_periderm	ENSDART00000026152	ENSDARG00000010181	4.48335	4.95297	5.69249	5.042936667	9.81242	11.4516	9.07546	10.11316	9.19E-16	1.88E-14	13.72584215	-0.611292525
asap2b	periderm	ENSDART00000101556	ENSDARG00000019564	6.55646	7.19898	7.49171	7.082383333	7.28958	8.47151	7.11534	7.625476667	0.84217527	0.905211657	0.043249862	0.01246612
asap3	non_periderm	ENSDART00000130080	ENSDARG00000021896	10.351	12.0609	13.8192	12.07703333	20.7027	24.2019	24.9204	23.275	2.43E-14	4.38E-13	12.35852589	-0.576165267
asb11	periderm	ENSDART00000079068	ENSDARG00000056561	46.6968	44.2704	46.3645	45.77723333	34.3215	32.2042	36.0748	34.20016667	2.40E-10	2.91E-09	8.536107011	0.366537851
asb2b	periderm	ENSDART00000162239	ENSDARG00000102490	10.4087	10.8953	10.332	10.54533333	7.43371	9.01682	6.84205	7.764193333	4.80E-05	0.00026371	3.578873401	0.393593955
ascl1a	non_periderm	ENSDART00000056005	ENSDARG00000038386	11.0725	11.8784	11.7501	11.567	15.368	16.5495	16.7782	16.2319	0.000276049	0.001293339	2.888287626	-0.259486433
asf1ba	periderm	ENSDART00000167179	ENSDARG00000101037	108.455	125.14	113.405	115.6666667	147.723	134.289	128	136.6706667	0.184805171	0.324750433	0.488450261	-0.092130611
ash1l	non_periderm	ENSDART00000052915	ENSDARG00000070981	1.47793	1.24957	1.85893	1.52881	1.19217	1.19891	1.43896	1.27668	0.031753367	0.080656269	1.093361871	0.257165199
aspa	non_periderm	ENSDART00000074117	ENSDARG00000005154	0.797273	0.959877	1.05468	0.937276667	0.677963	0.0959815	0.0692565	0.281067	0.011324444	0.033966655	1.46894722	1.699946609
asphd2	non_periderm	ENSDART00000083066	ENSDARG00000059629	16.6791	16.1227	17.3299	16.71056667	16.6649	16.5303	15.7716	16.32226667	0.074914071	0.161648079	0.791429452	0.105357531
astn1	periderm	ENSDART00000134926	ENSDARG00000068323	7.15077	6.6023	6.44152	6.73153	3.26346	1.79057	3.69366	2.915896667	8.33E-05	0.000436056	3.360457733	0.950189082
atf7ip	non_periderm	ENSDART00000148413	ENSDARG00000069619	293.18	297.178	322.392	304.25	394.706	418.031	401.596	404.7776667	1.34E-07	1.14E-06	5.943095149	-0.249470996
atg13	periderm	ENSDART00000052324	ENSDARG00000036040	52.5832	47.9892	53.4894	51.35393333	61.0791	62.7461	57.9258	60.58366667	0.064575768	0.14363077	0.842752511	-0.084790304
atg4c	non_periderm	ENSDART00000051779	ENSDARG00000044373	8.28187	7.56428	8.39499	8.08038	12.1026	14.4071	13.8268	13.4455	2.20E-09	2.36E-08	7.627087997	-0.424790044
atg9a	periderm	ENSDART00000065411	ENSDARG00000044551	0.183625	0.308839	0.322355	0.271606333	0.125926	0.369845	0.326442	0.274071	0.696206096	0.80675815	0.093256639	0.139477416
atl2	periderm	ENSDART00000080460	ENSDARG00000057719	22.6423	23.0311	24.1708	23.2814	16.4292	17.9329	18.2515	17.53786667	5.12E-10	5.95E-09	8.225483034	0.365614676
atl3	periderm	ENSDART00000023054	ENSDARG00000004270	8.099	8.67453	8.10125	8.291593333	7.35566	7.89834	7.31965	7.52455	0.009135579	0.028250804	1.548969188	0.18061669
atoh1a	non_periderm	ENSDART00000077642	ENSDARG00000055294	0.126986	0.0384783	0	0.055154767	0.432138	0.691444	1.00456	0.709380667	0.000676302	0.002888865	2.539272753	-2.71580372
atoh1b	non_periderm	ENSDART00000159069	ENSDARG00000099564	0.988284	1.66683	0.932955	1.196023	6.90314	6.27827	6.054	6.411803333	5.70E-11	7.41E-10	9.130181792	-1.636848659
atoh1c	periderm	ENSDART00000153618	ENSDARG00000039602	0	1.00747	0.783006	0.596825333	0	1.48303	3.00E-07	0.494343433	0.617236203	0.746844088	0.126770053	0.720165238
atp13a2	periderm	ENSDART00000088777	ENSDARG00000061890	2.51153	2.00031	2.67432	2.395386667	2.17275	2.56335	2.13018	2.28876	0.175046651	0.312359641	0.505345085	0.126253816
atp1a1b	non_periderm	ENSDART00000005086	ENSDARG00000019856	5.33778	6.49461	5.66525	5.832546667	7.59255	8.1097	7.66992	7.790723333	0.004560093	0.015520791	1.809086149	-0.209066867
atp1a2a	non_periderm	ENSDART00000093298	ENSDARG00000010472	3.53359	3.65884	5.43867	4.210366667	3.20054	4.48817	4.36663	4.018446667	0.405933986	0.566728913	0.24662463	0.121886123
atp1b1a	non_periderm	ENSDART00000006386	ENSDARG00000013144	198.919	195.847	200.976	198.5806667	190.886	191.916	194.346	192.3826667	0.003214714	0.011480385	1.940043547	0.11200063
atp1b3b	periderm	ENSDART00000062874	ENSDARG00000042837	40.4895	37.7062	40.0519	39.41586667	34.0425	33.5662	36.688	34.76556667	0.000133692	0.000671327	3.173065886	0.204051593
atp1b4	non_periderm	ENSDART00000075278	ENSDARG00000053262	2.48957	1.9099	1.65604	2.018503333	4.80097	5.52301	4.3494	4.891126667	2.41E-07	1.98E-06	5.70333481	-0.811819824
atp2a2a	periderm	ENSDART00000146241	ENSDARG00000029439	20.4105	24.7317	33.8093	26.31716667	37.9205	41.2756	40.4122	39.86943333	0.00289639	0.010468512	1.980115045	-0.353731588
atp2a3	periderm	ENSDART00000086443	ENSDARG00000060978	2.30767	2.60577	2.84961	2.587683333	0.952535	0.587598	1.51882	1.019651	0.000166271	0.000817736	3.087386882	1.084719579
atp2b1a	periderm	ENSDART00000077664	ENSDARG00000012684	16.1616	15.6542	19.0408	16.9522	16.2062	15.6953	15.1521	15.68453333	0.037187571	0.091922245	1.036579377	0.159851502
atp2b3b	periderm	ENSDART00000153828	ENSDARG00000023445	0.17053	0.12495	0.274353	0.189944333	0.0341106	0.00692392	0.0491702	0.03006824	0.000503024	0.002220339	2.653580713	2.072629899
atp2b4	periderm	ENSDART00000046122	ENSDARG00000044902	5.18352	5.36457	7.64454	6.06421	4.58131	5.24737	5.17368	5.000786667	0.009032322	0.02797765	1.553188767	0.263316794
atp2c1	periderm	ENSDART00000084528	ENSDARG00000060197	14.1017	15.8308	16.9951	15.64253333	13.3671	15.2945	14.021	14.22753333	0.001902719	0.007231552	2.140768487	0.176825003
atp5g3a	non_periderm	ENSDART00000016417	ENSDARG00000017775	285.62	283.719	277.517	282.2853333	263.249	249.168	283.966	265.461	0.028181691	0.07308523	1.136170382	0.135409263
atp5h	non_periderm	ENSDART00000160370	ENSDARG00000098355	603.763	582.865	535.602	574.0766667	554.208	505.324	522.756	527.4293333	0.06441841	0.143334485	0.84364931	0.133740067
atp5j	periderm	ENSDART00000147937	ENSDARG00000014313	218.738	215.57	172.868	202.392	153.484	113.586	121.617	129.5623333	0.000654604	0.002807968	2.551607846	0.470708808
atp6v0b	periderm	ENSDART00000147439	ENSDARG00000031681	51.9448	52.0411	52.3092	52.09836667	51.1742	48.497	52.1665	50.61256667	0.025768675	0.067695047	1.169443106	0.10816808
atp6v0ca	periderm	ENSDART00000123621	ENSDARG00000057853	53.0585	54.6806	51.4585	53.06586667	51.3694	59.7183	52.8105	54.63273333	0.449133128	0.606933896	0.216858607	0.043844833
atp6v0cb	periderm	ENSDART00000053139	ENSDARG00000036577	14.7011	12.3126	13.332	13.44856667	9.42111	9.82937	8.5049	9.251793333	2.92E-08	2.71E-07	6.567030709	0.450252382
atp6v0d1	periderm	ENSDART00000100254	ENSDARG00000069090	20.8907	22.9573	23.4993	22.4491	23.9114	24.3606	22.1344	23.4688	0.551786272	0.693599368	0.158891311	0.034926489
atp6v1ab	periderm	ENSDART00000154259	ENSDARG00000076318	24.0251	24.9222	26.7331	25.2268	24.7488	24.4402	26.4516	25.21353333	0.129393553	0.248327398	0.604975362	0.08148354
atp6v1ba	non_periderm	ENSDART00000007021	ENSDARG00000013443	47.5539	47.4278	53.9579	49.64653333	58.8088	62.318	60.3195	60.4821	0.008076715	0.025442544	1.594439466	-0.117629144
atp6v1c1a	non_periderm	ENSDART00000032275	ENSDARG00000023967	41.5728	38.5028	39.8167	39.9641	42.4806	48.1333	45.01	45.20796667	0.389427353	0.552583568	0.257602034	-0.044223808
atp7a	periderm	ENSDART00000054977	ENSDARG00000003699	0.587728	0.586803	0.573102	0.582544333	0.616518	0.831705	0.792302	0.746841667	0.297834143	0.45816283	0.338980147	-0.153577856
atrn	periderm	ENSDART00000131875	ENSDARG00000062164	7.12001	7.05688	7.65044	7.275776667	5.71155	7.11057	5.8168	6.212973333	0.001611426	0.006242369	2.204650563	0.247121883
atxn1a	periderm	ENSDART00000167664	ENSDARG00000061687	0.512548	0.657658	0.669659	0.613288333	0.307407	0.366804	0.575238	0.416483	0.03353588	0.084335835	1.073987851	0.493151388
axin2	non_periderm	ENSDART00000162413	ENSDARG00000100149	22.7973	23.6224	29.5566	25.32543333	41.4688	44.3478	43.8215	43.2127	1.90E-17	4.47E-16	15.34969248	-0.457159016
b2m	non_periderm	ENSDART00000075127	ENSDARG00000053136	3.61593	2.82636	2.86905	3.10378	3.51994	3.61555	4.01476	3.71675	0.511438258	0.659492422	0.18079019	-0.115641472
b3galt2	periderm	ENSDART00000159165	ENSDARG00000102061	9.15902	9.34445	11.3285	9.94399	9.72947	10.9034	10.2995	10.31079	0.537565789	0.68228473	0.166034348	0.042457594
b3gnt2b	non_periderm	ENSDART00000132755	ENSDARG00000091902	7.39669	6.91441	7.77757	7.36289	7.22195	7.23475	6.77642	7.077706667	0.06948968	0.152324663	0.817229774	0.123260187
b3gnt7	periderm	ENSDART00000056169	ENSDARG00000038489	14.7959	18.3444	17.8295	16.98993333	11.7734	9.82219	7.43757	9.67772	6.37E-06	4.14E-05	4.382999659	0.655729485
b3gntl1	periderm	ENSDART00000104222	ENSDARG00000043431	3.7895	2.6153	5.23572	3.880173333	2.51954	4.05443	3.42776	3.33391	0.352962157	0.516866991	0.286621203	0.20580591
b4galt1	periderm	ENSDART00000149913	ENSDARG00000002634	0.511357	0.280252	0.562916	0.451508333	0.39432	0.167116	0.314082	0.291839333	0.31988809	0.481685186	0.31723671	0.508336018
b4galt4	periderm	ENSDART00000167168	ENSDARG00000104042	5.0724	2.98072	4.63669	4.229936667	0.894933	2.42022	1.8801	1.731751	0.001905991	0.007241294	2.14018382	1.021723985
b4galt5	periderm	ENSDART00000055099	ENSDARG00000037815	1.79234	2.05828	1.90842	1.91968	1.83218	2.1686	1.85613	1.952303333	0.726820236	0.828513906	0.081700198	0.059961773
b9d1	periderm	ENSDART00000015393	ENSDARG00000011727	38.1311	38.866	41.6464	39.54783333	40.1317	39.819	40.1328	40.02783333	0.291801886	0.451822663	0.345031989	0.062009659
baiap2a	periderm	ENSDART00000091180	ENSDARG00000062799	7.59626	6.98746	9.43681	8.006843333	5.62586	4.74113	5.0396	5.13553	4.47E-08	4.05E-07	6.392544977	0.519764253
baiap2l1a	periderm	ENSDART00000042006	ENSDARG00000029305	4.33257	5.15358	6.08765	5.191266667	1.74885	2.56254	1.70412	2.00517	2.34E-14	4.22E-13	12.37468755	1.038959261
barhl2	non_periderm	ENSDART00000165609	ENSDARG00000104361	2.25033	1.86255	1.97489	2.029256667	3.82515	4.73152	4.63241	4.39636	5.28E-07	4.11E-06	5.386158178	-0.692299919
barx1	periderm	ENSDART00000023889	ENSDARG00000007407	0.495714	0.828994	0.533197	0.619301667	0.748208	0.648236	0.530352	0.642265333	0.95235108	0.972143602	0.012269578	0.02061917
bbox1	non_periderm	ENSDART00000173798	ENSDARG00000036135	3.65852	3.41109	4.91825	3.995953333	4.30473	5.5857	5.04744	4.97929	0.172317119	0.308617846	0.510578964	-0.145518112
bbs10	periderm	ENSDART00000101238	ENSDARG00000069515	3.34	2.98518	2.39633	2.90717	4.28828	4.46911	4.88949	4.54896	0.004997201	0.016787125	1.775023676	-0.374970789
bbs12	non_periderm	ENSDART00000007091	ENSDARG00000016112	1.7685	2.21018	1.55165	1.843443333	2.55978	2.89928	2.47884	2.645966667	0.024388891	0.064787198	1.188510803	-0.286635746
bbs4	non_periderm	ENSDART00000122929	ENSDARG00000063522	9.57118	8.02108	8.62351	8.73859	4.85123	5.69849	5.51429	5.35467	3.58E-11	4.77E-10	9.321481621	0.569657326
bbs5	non_periderm	ENSDART00000058255	ENSDARG00000039827	10.0605	9.70468	9.25243	9.672536667	8.20413	9.70116	10.2572	9.387496667	0.24120463	0.39469647	0.403736758	0.108549075
bbs9	periderm	ENSDART00000111308	ENSDARG00000079217	1.8801	2.33505	2.64938	2.288176667	2.57033	2.89561	4.02301	3.162983333	0.134156113	0.255157418	0.593191801	-0.231826313
bcam	non_periderm	ENSDART00000171819	ENSDARG00000090190	166.967	169.887	169.146	168.6666667	88.5569	76.3409	81.7568	82.2182	1.12E-30	5.85E-29	28.23284413	0.759402406
bcap31	periderm	ENSDART00000066107	ENSDARG00000044972	119.968	122.332	122.259	121.5196667	80.5272	80.1112	74.3682	78.33553333	1.62E-24	6.26E-23	22.20342567	0.507883412
bcas3	non_periderm	ENSDART00000149957	ENSDARG00000090764	1.95387	1.9484	2.33476	2.07901	2.40825	2.52108	2.29128	2.40687	0.517551315	0.664828389	0.177290444	-0.064172059
bcl11ab	non_periderm	ENSDART00000140827	ENSDARG00000063153	0.122869	0.0636196	0.426196	0.2042282	0.43996	0.595026	0.508158	0.514381333	0.032035105	0.081230766	1.090279451	-1.111484659
bcl2l1	periderm	ENSDART00000012507	ENSDARG00000008434	26.3887	28.1391	32.906	29.1446	32.5452	38.6006	36.326	35.82393333	0.042578348	0.102616919	0.988781029	-0.129013856
bcl2l10	periderm	ENSDART00000122377	ENSDARG00000026766	101.485	99.2918	97.4287	99.40183333	87.2582	82.0706	89.8404	86.38973333	0.000147846	0.000735757	3.133265597	0.213863438
bcl6a	periderm	ENSDART00000131126	ENSDARG00000070864	55.821	52.4937	59.2988	55.87116667	52.3628	57.2597	56.5632	55.39523333	0.05176306	0.12006248	0.92059269	0.08859496
bdh1	periderm	ENSDART00000147468	ENSDARG00000059388	3.42939	2.82307	2.99188	3.081446667	2.28156	2.08743	2.52066	2.29655	0.036450207	0.090432268	1.043676577	0.361764286
becn1	non_periderm	ENSDART00000115237	ENSDARG00000079128	12.8437	13.8558	14.1406	13.61336667	19.0746	19.0927	17.4851	18.5508	0.001212998	0.004840574	2.315103136	-0.230683306
bhlhe22	non_periderm	ENSDART00000147658	ENSDARG00000058039	2.69819	2.63934	2.34307	2.5602	3.64866	4.1038	4.42815	4.060203333	0.001853627	0.007067599	2.150728099	-0.379825453
bhlhe23	non_periderm	ENSDART00000054736	ENSDARG00000037588	0.0192211	0.119281	0.194545	0.1110157	0.0667753	0.131712	0.118448	0.1056451	0.891228273	0.935731279	0.028848853	-0.127875103
bhlhe40	periderm	ENSDART00000026017	ENSDARG00000004060	3.78006	4.30061	3.32171	3.800793333	4.13977	4.40151	4.57621	4.372496667	0.537911278	0.682586104	0.165842557	-0.062675623
bicd1a	non_periderm	ENSDART00000112671	ENSDARG00000079496	0.782737	0.873779	0.93049	0.862335333	1.18241	1.34049	1.18199	1.234963333	0.024752489	0.065576971	1.183248647	-0.273825735
bik	periderm	ENSDART00000066977	ENSDARG00000045549	3.12548	3.21587	2.42644	2.922596667	1.1789	1.25264	0.566287	0.999275667	0.001399919	0.005512374	2.258661324	1.155793468
birc5a	periderm	ENSDART00000115088	ENSDARG00000075621	37.8736	38.6535	34.7724	37.09983333	31.4187	28.4805	28.052	29.31706667	3.08E-05	0.000175968	3.754566302	0.310249539
birc5b	non_periderm	ENSDART00000139111	ENSDARG00000055655	0.503377	2.14116	0.630608	1.091715	0	0.336824	0	0.112274667	0.044031612	0.105436644	0.977008426	2.280299174
bmf2	periderm	ENSDART00000153087	ENSDARG00000041414	2.05414	2.52478	2.97127	2.51673	1.09126	0.887156	0.555239	0.844551667	2.11E-08	1.99E-07	6.701146924	1.196001433
bmi1a	non_periderm	ENSDART00000129554	ENSDARG00000006010	14.2139	13.7503	12.688	13.55073333	22.1241	21.0503	19.775	20.98313333	1.08E-06	7.99E-06	5.097453221	-0.356940429
bmp1a	non_periderm	ENSDART00000127875	ENSDARG00000028071	1.34683	1.46304	1.97455	1.594806667	2.20634	2.08767	2.30148	2.198496667	0.02801347	0.072739022	1.138232542	-0.249796282
bmp1b	non_periderm	ENSDART00000059795	ENSDARG00000028053	1.02845	1.27994	1.1759	1.16143	0.884468	1.50732	1.6023	1.331362667	0.900574993	0.9412563	0.026292104	-0.023589728
bmp2k	periderm	ENSDART00000006079	ENSDARG00000020009	17.4133	19.3391	22.4638	19.73873333	30.0622	36.6139	32.6875	33.1212	1.37E-12	2.10E-11	10.67778071	-0.436835607
bmp7a	periderm	ENSDART00000016472	ENSDARG00000018260	10.5832	10.7165	12.3962	11.23196667	5.70879	6.16025	5.76588	5.878306667	9.44E-26	3.89E-24	23.4100504	0.728276542
bmp7b	periderm	ENSDART00000138020	ENSDARG00000063230	0.142382	3.66374	4.97673	2.927617333	0.957616	2.01873	0	0.992115333	0.388080191	0.551224942	0.25867114	1.667400341
bmp8a	periderm	ENSDART00000103253	ENSDARG00000035677	0.811369	0.911112	0.803838	0.842106333	0.782962	1.21775	1.40465	1.135120667	0.44397489	0.602111039	0.22032341	-0.193240611
bmpr1ab	non_periderm	ENSDART00000166769	ENSDARG00000105045	22.5593	25.6091	29.7063	25.95823333	35.3192	38.3501	37.1414	36.9369	1.49E-07	1.26E-06	5.899629455	-0.275425981
bmpr1bb	non_periderm	ENSDART00000159412	ENSDARG00000102742	18.5386	20.29	25.1297	21.31943333	17.7603	15.6563	18.087	17.16786667	0.001256194	0.004995039	2.301461117	0.277292293
bnc2	non_periderm	ENSDART00000102322	ENSDARG00000069989	2.07006	2.55196	2.65484	2.42562	1.85702	2.18622	1.97523	2.006156667	0.009681004	0.029689968	1.52739027	0.270739027
bnip3	periderm	ENSDART00000162302	ENSDARG00000099961	3.48982	3.88368	3.09931	3.490936667	3.27574	4.13221	3.28597	3.56464	0.550010983	0.692388954	0.159649869	0.064534927
boc	non_periderm	ENSDART00000111025	ENSDARG00000074335	52.7021	58.6935	66.6802	59.3586	74.0705	78.7885	77.134	76.66433333	1.41E-05	8.61E-05	4.064996849	-0.175691033
bod1	periderm	ENSDART00000161175	ENSDARG00000103922	60.4852	62.3439	55.8965	59.5752	78.6534	70.3435	74.2288	74.40856667	0.03377356	0.084831713	1.071441763	-0.155598473
boka	periderm	ENSDART00000149429	ENSDARG00000052129	5.32064	6.14839	6.15444	5.87449	1.88883	2.08883	2.3291	2.102253333	4.69E-21	1.47E-19	18.83268267	1.108250768
brca2	non_periderm	ENSDART00000111472	ENSDARG00000079015	1.29435	1.55508	1.95475	1.601393333	2.25564	2.59041	2.36908	2.405043333	0.000369798	0.001688582	2.772477845	-0.332539322
bsdc1	non_periderm	ENSDART00000005195	ENSDARG00000052623	37.1502	35.8853	39.2821	37.4392	44.6089	47.91	50.7187	47.74586667	0.001106334	0.004469008	2.349788868	-0.162781169
bsg	periderm	ENSDART00000161598	ENSDARG00000019881	41.8089	29.276	28.2696	33.11816667	31.1477	26.9309	30.9909	29.68983333	0.280653606	0.439633862	0.356908864	0.173758116
bspry	periderm	ENSDART00000169695	ENSDARG00000104875	0.676265	0.890062	0.530041	0.698789333	0.735372	0.476809	0.656066	0.622749	0.582103386	0.71847744	0.143586864	0.180579146
bsx	non_periderm	ENSDART00000099983	ENSDARG00000068976	1.2765	0.975911	1.56481	1.272407	2.377	1.96853	1.11321	1.81958	0.369937698	0.533302187	0.273026635	-0.260173782
btbd6a	non_periderm	ENSDART00000103628	ENSDARG00000076440	5.78374	5.98988	8.4504	6.74134	14.2964	12.7487	14.9986	14.01456667	1.94E-09	2.09E-08	7.679853714	-0.664424515
btbd6b	periderm	ENSDART00000039907	ENSDARG00000032369	49.2227	51.8294	55.8351	52.29573333	43.9943	48.315	44.1321	45.48046667	6.98E-06	4.51E-05	4.345823458	0.218576322
btr02	periderm	ENSDART00000101563	ENSDARG00000052215	0.817594	1.14063	1.0792	1.012474667	0.16464	0.111897	0.426352	0.234296333	0.000716508	0.003044903	2.516426538	1.634258944
btr06	periderm	ENSDART00000173946	ENSDARG00000054184	0.622786	0.750204	0.812938	0.728642667	0.943877	1.13252	0.894006	0.990134333	0.816865223	0.889119271	0.051039977	-0.223610845
btr29	periderm	ENSDART00000167174	ENSDARG00000099138	1.15367	1.34173	1.69913	1.398176667	0.482038	0.521721	0.444532	0.482763667	2.30E-13	3.79E-12	11.42136079	1.131541732
c1galt1a	non_periderm	ENSDART00000144823	ENSDARG00000055585	0.730994	0.977218	0.38611	0.698107333	0.348132	0.584954	0.284846	0.405977333	0.32193572	0.483631369	0.315485538	0.574123561
c1galt1c1	periderm	ENSDART00000052789	ENSDARG00000036335	5.91275	6.79214	6.45482	6.38657	5.24992	5.97163	5.49668	5.572743333	0.005177474	0.017299699	1.761961453	0.219299936
c1ql3b	periderm	ENSDART00000041052	ENSDARG00000036483	0.517267	0.374385	0.727087	0.539579667	0.523745	0.883958	0.159106	0.522269667	0.588394356	0.723366345	0.140641701	0.274560903
ca15b	periderm	ENSDART00000152521	ENSDARG00000040510	0.422758	1.01737	0.267499	0.569209	0.201277	0.134135	0.201106	0.178839333	0.057273189	0.13031837	0.884994361	1.057853793
ca7	non_periderm	ENSDART00000066380	ENSDARG00000045139	2.14525	2.1917	1.57439	1.970446667	0.176411	0.167522	0.526608	0.290180333	8.60E-08	7.51E-07	6.124360063	2.096275022
cab39l	periderm	ENSDART00000053240	ENSDARG00000036658	53.5824	52.1059	56.9553	54.21453333	61.995	68.6288	66.3311	65.65163333	0.013193074	0.03869157	1.412383647	-0.108673472
cacna1bb	non_periderm	ENSDART00000132142	ENSDARG00000079295	0.0789854	0.194375	0.165294	0.146218133	0.0609439	0	0.074818	0.045253967	0.090970367	0.188559263	0.724552128	1.745453422
cacna1g	periderm	ENSDART00000123534	ENSDARG00000089913	0.881192	1.05079	1.02948	0.987154	0.0657336	0.071455	0.102716	0.0799682	1.06E-24	4.16E-23	22.38090667	2.581345532
cacna1i	non_periderm	ENSDART00000145615	ENSDARG00000070522	0.163223	0.240317	0.232399	0.211979667	0.042611	0.060363	0.0332349	0.045402967	0.000292005	0.001361784	2.865891773	1.604680482
cacnb4a	non_periderm	ENSDART00000017833	ENSDARG00000009738	0.290896	0.406082	0.531997	0.409658333	0.568181	0.420935	0.143434	0.377516667	0.524155754	0.670434405	0.173643707	0.273916186
cacnb4b	non_periderm	ENSDART00000089577	ENSDARG00000062174	1.9346	1.6336	2.27246	1.946886667	1.40979	1.75841	1.30743	1.491876667	0.048849345	0.114622315	0.940730824	0.347211726
cadm1a	non_periderm	ENSDART00000112869	ENSDARG00000031075	0.272847	2.93637	2.28871	1.832642333	3.83093	2.69803	2.97716	3.168706667	0.319383294	0.481148858	0.317720541	-0.852989509
cadm2a	non_periderm	ENSDART00000056369	ENSDARG00000009930	0.0421155	0.235163	0.28416	0.187146167	0.219341	0.172821	0.181426	0.191196	0.810755552	0.885011854	0.053050912	-0.178083596
cahz	periderm	ENSDART00000013411	ENSDARG00000011166	16.1895	16.6596	15.756	16.2017	8.97036	5.65586	8.18838	7.604866667	1.12E-07	9.64E-07	6.015922966	0.85237241
camk2d1	periderm	ENSDART00000148369	ENSDARG00000043010	4.9012	7.04441	12.9599	8.301836667	7.39322	5.69013	7.79497	6.95944	0.567954127	0.706692501	0.150769517	0.157404093
camk2g1	non_periderm	ENSDART00000105518	ENSDARG00000071395	12.8157	15.1625	17.211	15.06306667	17.9527	18.9093	17.2913	18.0511	0.08802717	0.183629082	0.736058537	-0.102969776
camkvb	periderm	ENSDART00000125766	ENSDARG00000005141	0.211717	0.143245	0.301141	0.218701	0.177889	0.255524	0.159211	0.197541333	0.530925266	0.676711187	0.169596644	0.161268153
cant1a	periderm	ENSDART00000013376	ENSDARG00000012192	28.6676	27.7764	27.9115	28.1185	24.1976	19.9577	22.2776	22.1443	4.41E-05	0.000244489	3.611740676	0.320002936
cant1b	non_periderm	ENSDART00000166501	ENSDARG00000102977	12.493	13.4874	14.8973	13.6259	12.3079	13.2527	14.1231	13.2279	0.147896165	0.27522433	0.560313177	0.107832012
canx	periderm	ENSDART00000089021	ENSDARG00000037488	221.546	227.354	269.494	239.4646667	309.029	325.114	323.623	319.2553333	5.50E-08	4.92E-07	6.308034897	-0.206848621
cap1	periderm	ENSDART00000006344	ENSDARG00000016350	20.8195	21.6877	24.7355	22.41423333	14.7843	19.3414	19.0512	17.72563333	0.000111039	0.000566849	3.246532615	0.316837266
cap2	non_periderm	ENSDART00000164055	ENSDARG00000104478	6.40471	7.36197	8.76762	7.511433333	5.5776	5.68182	5.39275	5.550723333	1.12E-06	8.23E-06	5.084600165	0.377105778
capn1a	periderm	ENSDART00000046066	ENSDARG00000052702	7.52468	7.7195	7.40125	7.548476667	8.32533	8.58274	10.3909	9.099656667	0.23378249	0.386135246	0.413260555	-0.099600108
capn2b	periderm	ENSDART00000077958	ENSDARG00000055592	24.6825	25.8534	26.4697	25.66853333	13.5204	15.2196	14.8716	14.5372	1.30E-19	3.65E-18	17.43770714	0.650234918
capn5a	periderm	ENSDART00000157669	ENSDARG00000103317	3.49246	3.14193	4.26116	3.63185	2.2709	2.53715	1.7692	2.192416667	6.56E-07	5.02E-06	5.299296283	0.589730236
capn9	periderm	ENSDART00000007732	ENSDARG00000012341	33.6309	31.3239	33.7676	32.90746667	1.67712	1.72295	2.31109	1.90372	7.27E-151	3.41E-148	147.4672456	2.938730966
capns1a	periderm	ENSDART00000131339	ENSDARG00000035329	140.14	133.165	127.482	133.5956667	52.2098	43.1191	46.0068	47.1119	1.07E-37	7.75E-36	35.1106983	1.116521721
capns1b	periderm	ENSDART00000016112	ENSDARG00000013804	221.839	210.336	187.242	206.4723333	124.433	118.763	117.69	120.2953333	2.66E-13	4.35E-12	11.36151074	0.610946366
capza1b	non_periderm	ENSDART00000078509	ENSDARG00000056090	277.521	256.581	252.19	262.0973333	215.325	199.309	194.668	203.1006667	1.03E-06	7.62E-06	5.118045029	0.331537188
carhsp1	periderm	ENSDART00000151437	ENSDARG00000053129	35.2377	34.1009	30.0377	33.12543333	48.4767	44.6275	52.0279	48.37736667	0.001625488	0.006290001	2.201349286	-0.303371683
carm1	periderm	ENSDART00000006091	ENSDARG00000018698	108.836	112.072	128.628	116.512	181.797	213.104	191.13	195.3436667	1.85E-29	9.22E-28	27.03526908	-0.434072835
casc3	non_periderm	ENSDART00000040065	ENSDARG00000029911	22.0633	20.6868	25.8263	22.8588	34.2392	35.721	34.1797	34.7133	6.16E-13	9.73E-12	11.01188716	-0.338264206
casp6l1	periderm	ENSDART00000136919	ENSDARG00000025608	1.11514	0.637758	0.787263	0.846720333	0.472881	0.394425	0.129426	0.332244	0.0263619	0.069024336	1.160997762	1.074173061
casp8l2	non_periderm	ENSDART00000082478	ENSDARG00000070272	0.44034	0.63153	0.791559	0.621143	0.339609	0.489343	0.87894	0.569297333	0.809820113	0.884335952	0.053382719	0.175127697
cast	periderm	ENSDART00000132699	ENSDARG00000058693	37.1347	31.2878	35.0466	34.4897	18.0129	15.7555	14.6467	16.13836667	1.32E-20	4.02E-19	18.39577395	0.844300148
casz1	non_periderm	ENSDART00000002812	ENSDARG00000037030	1.60797	2.04221	2.18728	1.94582	1.3887	1.68942	1.29335	1.457156667	9.48E-05	0.000490619	3.309255637	0.37336411
cav2	periderm	ENSDART00000073726	ENSDARG00000052000	13.4084	13.3088	11.575	12.76406667	5.02041	4.58659	5.15772	4.921573333	1.08E-26	4.71E-25	24.32697909	1.027662816
cbfb	non_periderm	ENSDART00000172995	ENSDARG00000040917	2.62944	4.75099	5.06893	4.149786667	3.06135	1.67783	2.59737	2.445516667	0.259936625	0.416677624	0.380199821	0.55149136
cbln1	periderm	ENSDART00000145342	ENSDARG00000057296	0.764881	0.590876	0.649974	0.668577	0.236366	0.303546	0.209834	0.249915333	0.00859629	0.02683007	1.571378194	1.04021131
cbln2b	periderm	ENSDART00000136200	ENSDARG00000077151	0.163414	0.12442	0.525829	0.271221	0.247963	0.171681	0.161106	0.193583333	0.724693021	0.827410723	0.082278855	0.218560587
cbr1l	periderm	ENSDART00000010282	ENSDARG00000021149	32.4523	35.5046	33.5972	33.85136667	21.1844	17.1031	20.1012	19.4629	2.17E-13	3.58E-12	11.44611697	0.632778836
cbsb	periderm	ENSDART00000026275	ENSDARG00000010946	102.575	99.7968	105.232	102.5346	88.5115	106.621	102.356	99.16283333	0.018975857	0.052597153	1.279037763	0.11849593
ccbl2	periderm	ENSDART00000162581	ENSDARG00000101791	42.8623	44.1512	42.7093	43.24093333	12.255	22.8338	24.2948	19.79453333	0.000112218	0.000571962	3.242632824	0.858927066
ccdc120	non_periderm	ENSDART00000111961	ENSDARG00000032856	2.09145	2.59568	4.1238	2.936976667	8.42906	10.5052	8.81874	9.251	6.38E-10	7.33E-09	8.134896025	-1.100573025
ccdc146	periderm	ENSDART00000121843	ENSDARG00000004794	0.450001	0.557499	0.428906	0.478802	0.511593	0.984153	0.343785	0.613177	0.804529186	0.881159261	0.05494559	-0.075780748
ccdc149a	non_periderm	ENSDART00000112841	ENSDARG00000078829	6.09011	5.73319	5.73446	5.852586667	2.12578	2.14618	2.62577	2.299243333	8.85E-18	2.16E-16	15.66554625	1.01556724
ccdc28b	non_periderm	ENSDART00000135200	ENSDARG00000011222	11.5629	12.4674	13.4547	12.495	29.2452	28.9419	29.8918	29.35963333	1.25E-18	3.25E-17	16.48811664	-0.791103988
ccdc59	non_periderm	ENSDART00000140362	ENSDARG00000045755	20.5415	20.6228	19.4132	20.1925	23.6255	20.6005	19.8675	21.3645	0.761602984	0.852524217	0.069293275	0.023424452
ccdc6b	non_periderm	ENSDART00000126712	ENSDARG00000017595	1.58977	1.7841	2.63328	2.002383333	4.44745	8.27063	8.00782	6.908633333	5.18E-07	4.03E-06	5.394694954	-1.139175428
ccdc80	non_periderm	ENSDART00000000005	ENSDARG00000000002	5.59275	5.5934	6.3476	5.844583333	2.02725	1.98775	2.42232	2.145773333	6.67E-24	2.48E-22	21.60554832	1.083776753
ccdc85a	periderm	ENSDART00000057710	ENSDARG00000039497	0.202316	0.136005	0.155383	0.164568	0.0281266	0	0.0575404	0.028555667	0.056893215	0.129602839	0.887385485	2.002569229
ccdc85ca	non_periderm	ENSDART00000104999	ENSDARG00000005232	7.006	7.61277	9.88656	8.168443333	19.568	26.4101	21.0822	22.35343333	1.78E-18	4.55E-17	16.3419886	-0.930215939
ccdc85cb	non_periderm	ENSDART00000114851	ENSDARG00000079555	3.7033	5.10093	4.39818	4.400803333	3.05151	3.00332	2.72058	2.925136667	5.54E-06	3.63E-05	4.440093375	0.481447966
ccdc94	periderm	ENSDART00000036813	ENSDARG00000026185	59.4422	55.9049	55.5029	56.95	66.8227	67.9659	70.1595	68.31603333	0.044295203	0.105939608	0.974941638	-0.105549168
ccnb1	periderm	ENSDART00000063357	ENSDARG00000051923	135.908	143.81	146.77	142.1626667	112.774	115.281	114.618	114.2243333	3.33E-13	5.39E-12	11.26841123	0.296756102
ccnb2	non_periderm	ENSDART00000052541	ENSDARG00000036180	38.5502	39.653	37.3017	38.50163333	28.0511	28.1096	27.0604	27.74036667	1.30E-11	1.80E-10	9.744727495	0.403635195
ccnd1	non_periderm	ENSDART00000165320	ENSDARG00000101637	112.885	123.63	131.287	122.6006667	170.849	164.216	159.242	164.769	4.10E-08	3.73E-07	6.428291168	-0.215211146
ccne1	non_periderm	ENSDART00000163991	ENSDARG00000098622	19.7511	17.0527	19.664	18.8226	18.6196	17.5719	16.6045	17.59866667	0.028853655	0.074545587	1.127578061	0.146719405
cd248a	periderm	ENSDART00000171606	ENSDARG00000103713	9.08223	8.52958	9.66931	9.093706667	3.65462	4.95487	4.08522	4.23157	3.10E-26	1.32E-24	23.87942607	0.853678264
cd82a	non_periderm	ENSDART00000149426	ENSDARG00000019098	36.6635	41.3624	40.3402	39.45536667	55.2157	58.6151	56.9817	56.9375	6.13E-10	7.05E-09	8.151810883	-0.286379136
cd82b	periderm	ENSDART00000147886	ENSDARG00000026070	6.83557	7.76719	7.19308	7.26528	7.37807	7.1981	6.97501	7.183726667	0.220813262	0.370417914	0.431308018	0.092629818
cd99	periderm	ENSDART00000136383	ENSDARG00000051975	8.07361	6.44001	6.07891	6.864176667	3.46782	2.79605	2.80602	3.023296667	9.47E-11	1.21E-09	8.91721463	0.893481253
cd99l2	non_periderm	ENSDART00000173602	ENSDARG00000056722	62.0321	61.9577	65.1682	63.05266667	75.3068	78.5712	73.4413	75.7731	0.010833595	0.032670503	1.485844179	-0.099169865
cd9b	periderm	ENSDART00000103319	ENSDARG00000016691	412.067	391.805	383.751	395.8743333	238.327	228.662	222.743	229.9106667	4.01E-29	1.99E-27	26.70114692	0.611908916
cdc27	non_periderm	ENSDART00000132190	ENSDARG00000056258	27.828	29.3482	33.4063	30.19416667	30.0948	35.7362	29.7257	31.85223333	0.540453973	0.684373889	0.164706569	0.030963556
cdc42ep4a	non_periderm	ENSDART00000157735	ENSDARG00000101457	10.6946	10.8834	11.4042	10.99406667	7.95088	7.07318	9.46353	8.16253	6.53E-05	0.000350015	3.455913343	0.382543807
cdh15	non_periderm	ENSDART00000098453	ENSDARG00000068191	8.70287	10.8892	13.2697	10.95392333	5.6185	6.03391	4.85869	5.5037	3.29E-12	4.86E-11	10.31336373	0.758576855
cdh23	non_periderm	ENSDART00000135231	ENSDARG00000094454	1.38811	1.93611	2.21651	1.84691	0.695039	0.470765	0.317307	0.494370333	1.84E-08	1.75E-07	6.756961951	1.40905361
cdh6	non_periderm	ENSDART00000013638	ENSDARG00000014522	21.5158	24.0071	28.5761	24.69966667	42.3052	48.468	45.7874	45.5202	2.73E-19	7.44E-18	17.12842706	-0.53328125
cdh7	non_periderm	ENSDART00000030547	ENSDARG00000023542	8.84578	11.1102	13.7132	11.22306	15.0458	15.3196	14.7387	15.0347	0.021585876	0.05855993	1.232399451	-0.227350701
cdipt	periderm	ENSDART00000104051	ENSDARG00000070686	27.2219	29.2692	29.3643	28.61846667	23.1384	23.0003	22.4782	22.8723	2.66E-06	1.84E-05	4.735182177	0.299182689
cdk5r1b	non_periderm	ENSDART00000066294	ENSDARG00000045087	1.62037	0.893432	1.67021	1.394670667	0.546724	0.215154	0.940775	0.567551	0.021815727	0.05903508	1.228889844	1.077304566
cdk5r2b	periderm	ENSDART00000109037	ENSDARG00000078671	0.570592	0.585642	0.331063	0.495765667	0.645335	0.230507	0.472552	0.449464667	0.546464052	0.689521908	0.161451931	0.228431917
cdkal1	periderm	ENSDART00000163710	ENSDARG00000104848	84.5831	89.6683	88.7481	87.6665	110.008	109.399	108.318	109.2416667	0.002665045	0.009734112	2.011703661	-0.153904875
cdkl1	non_periderm	ENSDART00000044357	ENSDARG00000017329	12.0068	11.9653	12.15	12.0407	38.1279	40.2927	38.121	38.8472	5.47E-56	6.86E-54	53.16367588	-1.095245638
cdkl5	non_periderm	ENSDART00000157385	ENSDARG00000015240	0.783041	0.82075	0.715963	0.773251333	0.884915	1.57545	1.11011	1.190158333	0.070228717	0.153604291	0.813596652	-0.319518151
cdx4	non_periderm	ENSDART00000114973	ENSDARG00000036292	115.876	117.661	122.393	118.6433333	123.169	132.873	126.69	127.5773333	0.923169335	0.955631135	0.019709709	0.004075728
cebpa	periderm	ENSDART00000052366	ENSDARG00000036074	21.7483	21.2843	24.4162	22.48293333	11.9177	13.0113	12.0481	12.3257	1.11E-31	6.09E-30	29.21538271	0.682014526
cebpb	periderm	ENSDART00000062702	ENSDARG00000042725	164.686	166.048	148.986	159.9066667	146.411	141.314	144.159	143.9613333	0.008192233	0.025733599	1.589499471	0.17915016
cebpd	periderm	ENSDART00000122734	ENSDARG00000087303	165.519	166.888	158.351	163.586	93.8052	90.7943	101.359	95.3195	3.46E-23	1.23E-21	20.91009489	0.61237003
cecr1a	non_periderm	ENSDART00000073416	ENSDARG00000051746	20.0031	21.0357	21.0658	20.70153333	14.6417	21.1641	17.8137	17.87316667	0.011961036	0.035577206	1.448828162	0.238916558
celf3a	non_periderm	ENSDART00000039629	ENSDARG00000034668	8.61613	11.0881	12.4132	10.70581	16.814	16.0141	17.3421	16.7234	3.56E-05	0.000200812	3.697210338	-0.374678071
celf4	non_periderm	ENSDART00000131538	ENSDARG00000070045	4.62607	4.96911	6.44637	5.347183333	2.02785	1.57679	2.31986	1.974833333	1.64E-12	2.50E-11	10.60205999	1.070352705
celsr1a	non_periderm	ENSDART00000043737	ENSDARG00000069185	1.80289	1.83497	2.5807	2.072853333	1.69296	1.79485	1.87796	1.78859	0.017661828	0.049607462	1.304452992	0.220836054
celsr1b	non_periderm	ENSDART00000128852	ENSDARG00000058259	0.778252	0.740532	1.13384	0.884208	1.35763	1.50116	1.58322	1.48067	0.000112071	0.000571378	3.243076485	-0.445103485
cenpl	non_periderm	ENSDART00000056667	ENSDARG00000038802	4.48745	4.79726	6.81275	5.36582	4.38615	4.84522	4.36793	4.5331	0.041902694	0.10127859	0.994482354	0.231744246
cenpo	periderm	ENSDART00000109249	ENSDARG00000075619	18.7023	18.6243	20.6129	19.31316667	24.2908	23.2557	23.2908	23.61243333	0.088011508	0.183612527	0.736097692	-0.130513372
cenpv	periderm	ENSDART00000147407	ENSDARG00000092285	0.845502	3.34235	1.79279	1.993547333	2.45976	1.99575	0.836136	1.763882	0.845433682	0.90707352	0.042357511	0.09549921
cep290	periderm	ENSDART00000149696	ENSDARG00000062727	1.90663	2.49416	2.65057	2.350453333	4.03165	2.78266	2.98426	3.26619	0.109211508	0.217823591	0.661895087	-0.239303861
cep55l	periderm	ENSDART00000166600	ENSDARG00000102349	14.6965	18.0612	16.973	16.5769	15.2466	15.5296	15.5926	15.45626667	0.035239036	0.087838368	1.056315742	0.146336982
cep57l1	non_periderm	ENSDART00000048537	ENSDARG00000002826	31.5546	28.1115	30.4737	30.0466	35.7946	35.8429	38.844	36.82716667	0.028322391	0.073385986	1.134386866	-0.126325362
cerk	non_periderm	ENSDART00000100453	ENSDARG00000069169	3.03709	3.58717	3.95004	3.524766667	4.79737	5.83246	3.62467	4.7515	0.134144709	0.255152995	0.59319933	-0.206025629
cers2b	non_periderm	ENSDART00000149299	ENSDARG00000058992	18.0998	20.2343	27.0377	21.7906	18.9914	20.9906	19.1176	19.69986667	0.061589824	0.138206478	0.8594716	0.171036473
cers5	periderm	ENSDART00000011076	ENSDARG00000002365	21.0313	17.7885	20.1132	19.64433333	15.7244	17.1081	16.5433	16.4586	5.77E-05	0.000312254	3.50549199	0.254793728
cfl1	non_periderm	ENSDART00000006132	ENSDARG00000021124	154.652	137.545	148.399	146.8653333	268.727	234.216	246.06	249.6676667	1.32E-10	1.65E-09	8.782516056	-0.453035977
cfl1l	periderm	ENSDART00000026464	ENSDARG00000012972	788.701	792.063	742.187	774.317	367.607	337.735	348.865	351.4023333	2.16E-45	2.01E-43	42.69680394	0.858078493
cga	non_periderm	ENSDART00000053888	ENSDARG00000040479	0.33393	1.51895	1.37258	1.075153333	0.935854	2.0932	1.34157	1.456874667	0.598893485	0.731782288	0.135618106	-0.359728907
cgnl1	non_periderm	ENSDART00000129769	ENSDARG00000015805	49.4363	57.5043	67.7473	58.2293	64.5143	72.9599	66.2844	67.91953333	0.250397148	0.405527456	0.391979737	-0.0758281
ch25h	periderm	ENSDART00000066439	ENSDARG00000045190	0.425331	0.112949	0.0341521	0.1908107	0.350582	0.164603	0.594191	0.369792	0.318849283	0.480700246	0.318125656	-0.805564896
ch25hl1.1	periderm	ENSDART00000057553	ENSDARG00000039381	7.79856	4.52754	5.90506	6.077053333	0.150508	0.308654	0.079641	0.179601	5.08E-17	1.15E-15	14.93930216	3.581252503
ch25hl2	periderm	ENSDART00000056560	ENSDARG00000038728	0.554071	0.179277	0.162521	0.298623	0.13927	0.197076	0.177503	0.171283	0.522380762	0.669077244	0.174523741	0.448376255
chac1	non_periderm	ENSDART00000103330	ENSDARG00000070426	181.85	192.292	188.095	187.4123333	121.889	122.172	129.095	124.3853333	2.98E-32	1.69E-30	29.7721133	0.485692528
chchd1	non_periderm	ENSDART00000100941	ENSDARG00000029100	50.5049	49.2727	46.4264	48.73466667	47.9023	49.8409	48.8369	48.86003333	0.178136935	0.316246288	0.499974563	0.073877503
chd	non_periderm	ENSDART00000045110	ENSDARG00000006110	17.7711	18.2724	18.948	18.3305	20.8253	22.4541	20.4365	21.23863333	0.230089636	0.381771052	0.418197005	-0.063366496
chd7	non_periderm	ENSDART00000135230	ENSDARG00000075211	60.9328	63.5372	69.7175	64.72916667	71.1266	73.2909	70.6802	71.69923333	0.650465727	0.772764393	0.111952897	-0.016945062
chek1	periderm	ENSDART00000157593	ENSDARG00000104765	20.6654	18.7239	19.8576	19.74896667	31.1108	30.7684	27.566	29.81506667	1.09E-05	6.79E-05	4.168130226	-0.333650805
chia.3	non_periderm	ENSDART00000154337	ENSDARG00000009612	0.133944	0.0649004	0.305417	0.168087133	0.808564	0.672835	0.294455	0.591951333	0.223326138	0.373407263	0.427817239	-1.152203012
chia.6	periderm	ENSDART00000163452	ENSDARG00000093193	0.867616	0.835276	0.517761	0.740217667	0.123086	0	0	0.041028667	6.68E-05	0.00035688	3.44747779	3.443193711
chmp7	non_periderm	ENSDART00000060628	ENSDARG00000041362	9.11503	9.14472	9.27721	9.178986667	9.07687	9.96125	12.1196	10.38590667	0.668590179	0.786817143	0.104126186	-0.038832713
chn2	periderm	ENSDART00000145452	ENSDARG00000011845	1.2985	1.94907	1.99165	1.746406667	1.04511	0.852317	0.714145	0.870524	0.182981315	0.322303422	0.491735083	0.697723901
chodl	periderm	ENSDART00000041335	ENSDARG00000034528	15.6196	15.5971	15.0255	15.41406667	7.31104	7.21305	8.68583	7.73664	1.00E-16	2.21E-15	14.65560773	0.765347084
chrna5	non_periderm	ENSDART00000021372	ENSDARG00000003420	1.41261	1.50607	2.27001	1.729563333	1.91738	0.932219	0.839595	1.229731333	0.236299098	0.389132653	0.409902325	0.463211812
chrna7	non_periderm	ENSDART00000166391	ENSDARG00000101702	0.147225	0.137062	0.0827874	0.122358133	0.341067	0	0	0.113689	0.258818859	0.415466976	0.381463491	1.363687153
chst14	non_periderm	ENSDART00000063152	ENSDARG00000043011	8.80062	9.16937	11.8108	9.92693	13.7456	14.7932	13.8418	14.12686667	0.000406968	0.001839432	2.735316263	-0.283658855
cilp	non_periderm	ENSDART00000075398	ENSDARG00000053362	2.25331	1.88549	3.07665	2.40515	1.71378	2.49686	2.1071	2.105913333	0.174006431	0.310924085	0.507345635	0.207677605
cited4a	non_periderm	ENSDART00000133059	ENSDARG00000035990	129.571	140.034	153.278	140.961	205.36	213.583	206.572	208.505	2.30E-16	4.95E-15	14.3053948	-0.312681624
cited4b	non_periderm	ENSDART00000167001	ENSDARG00000101009	162.247	156.428	167.727	162.134	96.8779	105.377	102.595	101.6166333	4.97E-38	3.67E-36	35.43533394	0.543601439
clasp2	non_periderm	ENSDART00000136873	ENSDARG00000020345	19.4262	20.2341	25.6993	21.78653333	29.0906	32.5758	32.3845	31.3503	9.87E-06	6.19E-05	4.208309351	-0.285069857
clcn7	periderm	ENSDART00000103660	ENSDARG00000019556	4.39145	6.16263	6.36634	5.64014	6.72966	6.98424	5.36363	6.359176667	0.730529722	0.830980174	0.080409338	-0.042805176
cldn11a	non_periderm	ENSDART00000010615	ENSDARG00000020031	0.144845	0.239538	0.162863	0.182415333	0.0837366	0	0.0889351	0.057557233	0.194520956	0.337455198	0.471783878	1.348923463
cldn11b	non_periderm	ENSDART00000105784	ENSDARG00000030723	27.0559	26.1069	28.0254	27.06273333	32.0824	35.3087	34.2247	33.87193333	0.004655597	0.015793019	1.801534842	-0.141879399
cldn12	non_periderm	ENSDART00000025877	ENSDARG00000003927	25.0375	25.1626	28.0875	26.09586667	44.7742	42.0997	41.8328	42.90223333	2.67E-16	5.70E-15	14.24412514	-0.4145605
cldn15la	periderm	ENSDART00000028093	ENSDARG00000016081	1.05165	1.2001	0.954077	1.068609	1.06946	0.86699	1.22621	1.05422	0.826867893	0.894946339	0.048203004	0.079208219
cldn17	periderm	ENSDART00000075785	ENSDARG00000099950	0.395415	0.523471	0.19451	0.371132	0.637869	1.11124	0.524097	0.757735333	0.129178637	0.248008498	0.605533438	-0.645791926
cldn5a	non_periderm	ENSDART00000064197	ENSDARG00000043716	118.805	146.436	151.234	138.825	186.703	194.139	181.407	187.4163333	5.05E-05	0.000276153	3.558850234	-0.229637606
cldn5b	non_periderm	ENSDART00000138242	ENSDARG00000014059	52.3934	55.4851	48.0136	51.96403333	41.4331	38.4216	37.6295	39.1614	3.64E-06	2.46E-05	4.609064893	0.358411898
cldn7b	periderm	ENSDART00000006173	ENSDARG00000014047	91.1634	87.4793	105.084	94.57556667	58.3876	67.2348	63.0827	62.9017	1.97E-17	4.62E-16	15.33535802	0.485709477
cldnb	periderm	ENSDART00000021664	ENSDARG00000009544	523.268	520.986	530.308	524.854	262.824	269.818	275.996	269.546	1.41E-79	3.00E-77	76.52287875	0.734647372
cldnc	periderm	ENSDART00000002341	ENSDARG00000015955	22.589	21.3831	21.0166	21.6629	18.7659	16.6667	17.6209	17.6845	3.95E-05	0.000221036	3.655536987	0.281614433
cldne	periderm	ENSDART00000063320	ENSDARG00000043128	44.0918	40.6867	42.1918	42.32343333	4.50145	4.73256	3.7356	4.323203333	1.53E-202	1.14E-199	198.9430951	2.363617924
cldnf	periderm	ENSDART00000146094	ENSDARG00000043133	6.61392	5.44974	5.26487	5.776176667	2.61487	2.36116	1.7726	2.249543333	6.98E-12	9.97E-11	10.00130484	1.026360912
cldnj	periderm	ENSDART00000081840	ENSDARG00000058880	3.48131	3.6279	4.76483	3.958013333	6.28881	7.57499	6.55161	6.805136667	9.16E-05	0.000476249	3.322165923	-0.47283689
cldnk	periderm	ENSDART00000062116	ENSDARG00000042357	0.857957	0.543046	1.41904	0.940014333	0.311933	0.462281	0.394639	0.389617667	0.005917928	0.01939642	1.71227842	0.879595015
clic1	periderm	ENSDART00000158935	ENSDARG00000103340	6.90448	6.60735	6.04312	6.518316667	5.65982	6.27064	4.98561	5.63869	0.026925258	0.070313287	1.152962599	0.225004843
clic4	non_periderm	ENSDART00000030691	ENSDARG00000022995	154.002	153.496	167.666	158.388	85.0865	88.5094	81.1394	84.91176667	6.90E-75	1.38E-72	71.86012091	0.705822492
clint1a	periderm	ENSDART00000144702	ENSDARG00000025535	42.947	44.7038	49.9047	45.85183333	42.8503	44.8374	42.4436	43.3771	0.001586491	0.006154478	2.210808776	0.136985053
clk4b	periderm	ENSDART00000139890	ENSDARG00000005908	44.8138	40.8816	42.033	42.57613333	47.0873	50.8244	48.2393	48.717	0.277125591	0.435839082	0.360673829	-0.057836548
cltca	periderm	ENSDART00000063849	ENSDARG00000043493	35.1633	39.9211	51.4397	42.1747	57.4137	66.5388	56.7451	60.23253333	0.001740224	0.006677392	2.175393128	-0.280690165
clvs2	non_periderm	ENSDART00000075112	ENSDARG00000053122	7.67037	6.17255	7.48026	7.107726667	5.66585	5.79898	6.27427	5.913033333	0.015587053	0.044631836	1.350355247	0.255112334
clybl	non_periderm	ENSDART00000042259	ENSDARG00000029729	3.21057	3.49805	3.4238	3.377473333	2.65154	3.25181	2.95798	2.953776667	0.092010155	0.190404187	0.720323506	0.21455016
cmbl	non_periderm	ENSDART00000110715	ENSDARG00000073786	0.65478	0.519355	0.676698	0.616944333	0.619228	0.503799	0.781459	0.634828667	0.849643079	0.909589338	0.041154639	0.057092606
cmn	periderm	ENSDART00000077840	ENSDARG00000055527	33.5717	35.6603	48.5229	39.25163333	2.0828	1.94815	1.78127	1.937406667	7.76E-212	6.14E-209	208.2118316	3.079604093
cmpk	periderm	ENSDART00000014088	ENSDARG00000019924	83.7613	89.8069	78.0774	83.88186667	59.7662	54.9024	55.4214	56.69666667	4.66E-10	5.44E-09	8.2644011	0.466767222
cnga3a	periderm	ENSDART00000104124	ENSDARG00000070726	0.0319743	0.101711	0.03597	0.056551767	0.0990062	0.294809	0.0660985	0.153304567	0.304934623	0.465904392	0.331703196	-0.783459882
cnksr1	periderm	ENSDART00000050018	ENSDARG00000032932	11.996	13.8175	13.9585	13.25733333	8.24014	8.06259	8.47495	8.259226667	9.02E-15	1.68E-13	12.77469072	0.552041702
cnn1a	periderm	ENSDART00000010236	ENSDARG00000017193	1.85235	2.20567	1.24112	1.76638	0.0820777	0.431883	0.607277	0.3737459	0.002191215	0.008208873	2.085716463	1.792563153
cnn3a	periderm	ENSDART00000158808	ENSDARG00000099510	204.567	204.27	201.85	203.5623333	233.684	241.802	240.927	238.8043333	0.034393406	0.086085041	1.065072309	-0.080529705
cnppd1	periderm	ENSDART00000037036	ENSDARG00000027078	33.8158	34.3666	37.9142	35.36553333	33.4655	36.923	39.013	36.46716667	0.307587929	0.46893805	0.328884527	0.050880213
cnpy4	periderm	ENSDART00000078192	ENSDARG00000055797	36.264	37.7789	33.1207	35.7212	32.8268	30.0647	33.9284	32.2733	0.034055092	0.085422119	1.06842966	0.172730265
cntfr	non_periderm	ENSDART00000145103	ENSDARG00000028661	74.8844	77.7886	85.4586	79.3772	67.71	69.7695	66.8243	68.10126667	4.18E-08	3.80E-07	6.420216403	0.232789002
cntn2	non_periderm	ENSDART00000000486	ENSDARG00000000472	1.05369	1.09718	1.12134	1.090736667	1.09164	2.1032	1.92086	1.705233333	0.094141694	0.193846429	0.712542195	-0.324889246
coasy	periderm	ENSDART00000062736	ENSDARG00000042747	8.72881	10.0408	9.70222	9.49061	14.2797	15.7346	14.316	14.77676667	2.08E-07	1.73E-06	5.761953897	-0.362621329
cog6	non_periderm	ENSDART00000169559	ENSDARG00000103149	13.19	14.5278	15.269	14.32893333	12.0892	10.3212	7.85596	10.08878667	0.0041824	0.014401819	1.841582652	0.411825344
col18a1	non_periderm	ENSDART00000097295	ENSDARG00000036558	62.271	61.1437	75.7435	66.38606667	61.7185	67.8538	64.2254	64.59923333	0.012916886	0.03799845	1.420234118	0.108533652
col1a1a	periderm	ENSDART00000140586	ENSDARG00000012405	16.3935	13.2597	14.3746	14.67593333	12.0721	15.1196	11.9064	13.0327	0.208596856	0.35546709	0.449200601	0.167567872
col27a1a	non_periderm	ENSDART00000161330	ENSDARG00000101258	0.480179	0.571023	0.642048	0.564416667	0.186073	0.463815	0.493366	0.381084667	0.072956746	0.158229941	0.800711334	0.550319103
col2a1a	non_periderm	ENSDART00000100234	ENSDARG00000069093	279.023	250.221	329.843	286.3623333	66.6079	66.7775	59.8204	64.40193333	2.62E-114	8.98E-112	111.0467237	1.572387058
col4a1	periderm	ENSDART00000130442	ENSDARG00000055009	4.38747	3.91417	4.77251	4.35805	2.40383	2.68358	2.52083	2.53608	2.46E-20	7.32E-19	18.13548892	0.625198159
col4a3bpa	periderm	ENSDART00000149787	ENSDARG00000024325	5.78952	5.00233	6.96809	5.91998	7.00104	7.23921	5.80641	6.68222	0.667124962	0.785610732	0.104792592	-0.0424451
col4a5	non_periderm	ENSDART00000073827	ENSDARG00000052063	31.3039	25.9612	37.3551	31.54006667	21.0778	21.9899	25.6316	22.89976667	0.000224466	0.001073264	2.969293438	0.398435828
col4a6	non_periderm	ENSDART00000174023	ENSDARG00000052061	9.05861	9.66282	11.2467	9.989376667	6.42264	7.54586	7.19476	7.05442	1.56E-11	2.15E-10	9.66756154	0.43218023
col5a1	non_periderm	ENSDART00000139598	ENSDARG00000012593	11.2975	12.3873	14.4923	12.7257	10.8134	11.1976	9.91342	10.64147333	7.21E-07	5.49E-06	5.260427656	0.261381701
col5a3b	periderm	ENSDART00000167061	ENSDARG00000098567	1.63338	3.05652	3.9721	2.887333333	2.99457	2.22119	1.93066	2.38214	0.678509146	0.793897611	0.100235505	0.168554543
col7a1l	non_periderm	ENSDART00000141566	ENSDARG00000069692	6.05433	8.13947	10.0853	8.093033333	6.70464	7.2399	7.31582	7.086786667	0.107833881	0.215732903	0.666083612	0.197054724
col8a1a	non_periderm	ENSDART00000102981	ENSDARG00000077403	172.228	183.255	214.944	190.1423333	33.1133	36.7167	34.5525	34.79416667	9.99E-300	9.99E-300	299.0004345	1.774907322
col9a2	periderm	ENSDART00000035093	ENSDARG00000024492	83.3483	77.8088	83.5498	81.56896667	12.3218	11.8991	13.4204	12.5471	5.13E-261	5.08E-258	257.2941363	1.955199747
commd3	periderm	ENSDART00000066764	ENSDARG00000045402	25.5363	27.8285	25.1568	26.17386667	27.0733	27.8881	26.8488	27.27006667	0.899551115	0.940595875	0.02659693	0.011547594
copz1	non_periderm	ENSDART00000011201	ENSDARG00000017844	273.662	271.294	261.761	268.9056667	248.131	245.124	240.638	244.631	0.000384276	0.001747077	2.757687954	0.159853268
coq3	non_periderm	ENSDART00000034109	ENSDARG00000069857	3.62747	2.97684	3.34416	3.316156667	3.61179	3.33561	2.93406	3.29382	0.534434636	0.679578885	0.167760123	0.083695159
coro1a	non_periderm	ENSDART00000076830	ENSDARG00000054610	1.42611	1.51505	1.12281	1.354656667	0.863354	0.806388	0.841872	0.837204667	0.011111564	0.033406924	1.476163511	0.546549904
coro1b	periderm	ENSDART00000021559	ENSDARG00000008660	7.21167	7.74505	8.90545	7.954056667	10.5145	11.0754	8.68822	10.09270667	0.040909165	0.099301833	1.003042735	-0.152059983
coro2a	periderm	ENSDART00000011645	ENSDARG00000005210	8.47838	10.3626	10.2573	9.699426667	7.00186	6.96134	6.92394	6.96238	3.71E-06	2.50E-05	4.602059991	0.409297378
coro2bb	periderm	ENSDART00000093093	ENSDARG00000063604	0.412298	0.381856	0.5823	0.458818	0.531538	0.415643	0.549013	0.498731333	0.964272698	0.978952031	0.009238588	-0.016228967
cox10	non_periderm	ENSDART00000048927	ENSDARG00000034309	49.4621	49.9889	54.9655	51.47216667	59.2222	62.0088	60.0352	60.42206667	0.076444377	0.16429313	0.784380596	-0.08104277
cox16	periderm	ENSDART00000057164	ENSDARG00000039136	35.7031	35.2557	34.3598	35.1062	39.3603	39.1132	38.8975	39.12366667	0.551671436	0.693599368	0.158891311	-0.038383463
cox17	periderm	ENSDART00000102143	ENSDARG00000069920	173.26	160.976	155.829	163.355	86.0518	81.5976	75.4855	81.04496667	7.75E-22	2.55E-20	19.59345982	0.724313697
cox5aa	non_periderm	ENSDART00000138087	ENSDARG00000088383	892.697	851.363	806.804	850.288	590.948	555.333	563.486	569.9223333	6.67E-13	1.05E-11	10.9788107	0.446029392
cox6b1	non_periderm	ENSDART00000066506	ENSDARG00000045230	4.54212	3.07159	3.25203	3.621913333	3.29145	1.79041	2.08802	2.38996	0.119409714	0.233431341	0.631840835	0.466790006
cox7c	non_periderm	ENSDART00000165249	ENSDARG00000104537	2454.67	2420.19	2243.58	2372.813333	1925.78	1745.56	1795.56	1822.3	1.14E-05	7.05E-05	4.151810883	0.27448286
cox8a	periderm	ENSDART00000138236	ENSDARG00000095273	763.821	735.052	674.254	724.3756667	603.732	520.992	581.841	568.855	0.000767878	0.003238066	2.489714303	0.277959864
cpa6	non_periderm	ENSDART00000106188	ENSDARG00000012013	11.1213	12.7207	12.9023	12.2481	18.281	19.802	18.2358	18.77293333	9.42E-07	7.04E-06	5.152427341	-0.349872356
cpped1	periderm	ENSDART00000045609	ENSDARG00000031968	9.67818	9.38691	9.8874	9.65083	7.85698	6.53633	8.1457	7.513003333	9.11E-05	0.000473452	3.324724045	0.334213463
cpsf3l	non_periderm	ENSDART00000102902	ENSDARG00000025212	19.5245	20.4977	22.9689	20.99703333	33.0301	31.1765	31.1673	31.7913	1.19E-07	1.02E-06	5.991399828	-0.33677676
cpz	non_periderm	ENSDART00000147497	ENSDARG00000075521	4.0664	3.79325	3.91813	3.925926667	1.84489	1.53679	1.68657	1.689416667	1.79E-15	3.57E-14	13.44733178	0.92541014
crabp2a	non_periderm	ENSDART00000170957	ENSDARG00000073978	56.8882	57.6703	56.064	56.87416667	57.6293	64.8924	60.9535	61.1584	0.823996372	0.893222414	0.049040388	0.009754545
crb1	non_periderm	ENSDART00000161253	ENSDARG00000100506	9.24417	11.9489	16.56	12.58435667	10.7852	8.95846	8.92921	9.557623333	0.033899719	0.085118579	1.069975635	0.335040231
crb2a	non_periderm	ENSDART00000084378	ENSDARG00000060106	7.82902	10.0578	13.9656	10.61747333	15.82	14.4481	11.8114	14.0265	0.190837153	0.332786171	0.477834729	-0.214246974
creb3l2	periderm	ENSDART00000147436	ENSDARG00000063563	31.7795	41.1256	44.1044	39.00316667	15.9009	30.5749	29.1755	25.2171	0.021856602	0.059132213	1.228175867	0.497924331
crebbpa	periderm	ENSDART00000166775	ENSDARG00000104609	1.89164	1.85263	3.02234	2.255536667	3.5068	3.60939	4.13139	3.749193333	0.001834535	0.0069993	2.154945392	-0.445643176
crfb6	periderm	ENSDART00000097648	ENSDARG00000067795	7.7471	7.00019	8.17639	7.641226667	8.34585	7.71233	7.9701	8.009426667	0.678411124	0.793841059	0.100266442	0.032921622
crlf1a	periderm	ENSDART00000112243	ENSDARG00000024365	37.1826	37.4756	39.345	38.00106667	43.3884	46.9203	43.122	44.4769	0.113085377	0.223857502	0.650028347	-0.075745586
crlf1b	periderm	ENSDART00000164856	ENSDARG00000006368	0.680916	0.660833	0.772249	0.704666	0.804577	0.518031	0.834688	0.719098667	0.619361975	0.748334464	0.125904253	0.08453391
crlf3	periderm	ENSDART00000075903	ENSDARG00000070261	43.0552	42.79	47.8136	44.55293333	52.372	53.5094	53.0928	52.9914	0.041676746	0.100821431	0.996447143	-0.093336438
cry-dash	periderm	ENSDART00000139329	ENSDARG00000002396	18.1344	17.3515	19.2309	18.23893333	26.6922	23.8143	22.73	24.41216667	0.000625834	0.002697557	2.56902937	-0.210747509
cryba2a	periderm	ENSDART00000041269	ENSDARG00000030349	1.80392	2.2837	0.802437	1.630019	0.862032	0.565808	0.317062	0.581634	0.015309347	0.043953278	1.35700873	1.061386486
crygn1	non_periderm	ENSDART00000165151	ENSDARG00000102129	0.987005	1.15958	0.685433	0.944006	0.645653	0.31262	0.283212	0.413828333	0.11762804	0.230708253	0.636936869	0.884945684
cryl1	periderm	ENSDART00000062656	ENSDARG00000003675	5.58091	2.99271	3.32013	3.964583333	0.342388	2.73459	4.24378	2.440252667	0.233410087	0.385684086	0.413768281	0.938820895
csnk1a1	periderm	ENSDART00000130655	ENSDARG00000052674	158.43	155.198	176.723	163.4503333	168.476	187.11	183.714	179.7666667	0.70750607	0.815263102	0.088702213	-0.015139517
csnk1da	periderm	ENSDART00000025326	ENSDARG00000008370	22.5095	22.5363	24.8922	23.31266667	35.4581	32.5665	37.6938	35.23946667	6.89E-09	6.93E-08	7.159266765	-0.328920774
csnk1g1	non_periderm	ENSDART00000165875	ENSDARG00000104342	9.51198	10.2	12.617	10.77632667	14.3285	15.1502	14.1373	14.53866667	7.98E-05	0.000419797	3.376960669	-0.220860075
csrnp1a	periderm	ENSDART00000041877	ENSDARG00000031426	10.9796	11.5965	14.1612	12.24576667	7.50382	9.18811	7.75492	8.14895	3.70E-13	5.96E-12	11.22475374	0.487749209
csrp2	periderm	ENSDART00000134123	ENSDARG00000011961	8.106	7.48348	10.5971	8.72886	6.59353	7.85667	8.46553	7.638576667	0.075015649	0.161798637	0.791025141	0.198152022
ctbp1	non_periderm	ENSDART00000144367	ENSDARG00000057007	155.181	157.799	188.164	167.048	268.819	268.83	277.056	271.5683333	5.92E-21	1.84E-19	18.73518218	-0.428788705
ctdsplb	periderm	ENSDART00000171397	ENSDARG00000062116	17.9495	16.2468	16.6506	16.94896667	19.1588	18.8622	16.9712	18.33073333	0.938990249	0.964697826	0.0156087	0.004913497
cth	non_periderm	ENSDART00000138351	ENSDARG00000074301	93.7059	94.1396	95.3063	94.38393333	130.834	136.003	140.871	135.9026667	8.15E-12	1.15E-10	9.93930216	-0.286144506
cth1	non_periderm	ENSDART00000101601	ENSDARG00000057328	0.965915	1.1269	0.869015	0.987276667	0.782962	0.688295	0.690423	0.72056	0.160743192	0.292837454	0.533373378	0.381481879
cthl	non_periderm	ENSDART00000136314	ENSDARG00000032206	0.135799	0.0315124	0.135755	0.101022133	0.382194	0.6421	0.456001	0.493431667	0.009523298	0.029269326	1.533587278	-1.572842202
ctnna2	non_periderm	ENSDART00000153506	ENSDARG00000024785	0.956239	0.882359	1.08252	0.973706	0.680962	0.0675635	0.205008	0.3178445	0.017106532	0.048303029	1.316025635	1.561942876
ctnnb1	non_periderm	ENSDART00000038495	ENSDARG00000014571	569.161	544.056	539.538	550.9183333	649.677	635.058	634.786	639.8403333	0.17618999	0.313582785	0.503647787	-0.066345389
ctr9	non_periderm	ENSDART00000021317	ENSDARG00000009170	85.6676	84.82	102.702	91.0632	113.511	125.761	125.15	121.474	1.85E-06	1.31E-05	4.882728704	-0.206998202
ctrl	periderm	ENSDART00000099425	ENSDARG00000068680	1.63552	1.08069	1.23233	1.31618	1.1002	1.03368	0.918581	1.017487	0.196031531	0.339414376	0.469269767	0.316165517
ctsbb	non_periderm	ENSDART00000166115	ENSDARG00000101051	0.221379	0.177867	0.339619	0.246288333	0.24786	0.169782	0.0875392	0.168393733	0.36297943	0.526651301	0.278476839	0.486152245
ctsll	non_periderm	ENSDART00000144226	ENSDARG00000011701	2.6228	2.93153	2.38876	2.647696667	1.05345	1.39268	1.60013	1.348753333	5.51E-05	0.000299541	3.523543725	0.754419477
cttn	periderm	ENSDART00000174305	ENSDARG00000011777	41.256	47.1614	50.6919	46.36976667	80.6069	90.723	85.5159	85.61526667	2.12E-34	1.33E-32	31.87614836	-0.534580152
cul1b	non_periderm	ENSDART00000024691	ENSDARG00000007691	27.1151	23.1992	22.6588	24.32436667	22.3976	21.1803	17.1748	20.2509	0.018534242	0.051585886	1.287469106	0.269318891
cul2	periderm	ENSDART00000138432	ENSDARG00000013965	32.377	32.52	36.6955	33.86416667	38.1679	39.7058	38.8794	38.9177	0.212510861	0.360463767	0.443138383	-0.05812581
cul3a	periderm	ENSDART00000056882	ENSDARG00000038967	75.9904	72.1314	81.2536	76.45846667	101.533	110.583	109.475	107.197	1.24E-10	1.55E-09	8.809668302	-0.255957116
cul4a	periderm	ENSDART00000160843	ENSDARG00000096578	23.2092	23.844	24.9024	23.9852	25.5538	30.2963	29.1072	28.3191	0.115171942	0.227079127	0.643822784	-0.081756161
cwc22	non_periderm	ENSDART00000023684	ENSDARG00000014008	26.9429	27.4084	30.6536	28.33496667	39.5723	41.8729	42.7597	41.40163333	1.22E-10	1.53E-09	8.815308569	-0.297223571
cx30.9	non_periderm	ENSDART00000103163	ENSDARG00000070362	0.632481	0.929841	1.55406	1.038794	0.54182	0.607277	1.03614	0.728412333	0.198773173	0.343027245	0.464671385	0.394935437
cx35.4	periderm	ENSDART00000062917	ENSDARG00000042866	6.1544	8.21903	7.51706	7.29683	7.33969	9.67263	8.502	8.504773333	0.463506802	0.61935403	0.208061032	-0.074380667
cx43	non_periderm	ENSDART00000061261	ENSDARG00000041799	12.1498	12.7777	14.2856	13.07103333	21.8411	24.1297	20.9701	22.31363333	5.61E-15	1.07E-13	12.97061622	-0.452888193
cx52.6	non_periderm	ENSDART00000042123	ENSDARG00000034930	0.249207	0.0800035	0.2655	0.198236833	0.197836	0.379943	0.321516	0.299765	0.477306145	0.631232413	0.199810709	-0.40654173
cxcl12a	non_periderm	ENSDART00000053946	ENSDARG00000037116	71.7815	70.8098	72.7375	71.77626667	66.2699	67.5585	66.0169	66.6151	0.00012642	0.000637146	3.195761039	0.157200422
cxcl12b	non_periderm	ENSDART00000077411	ENSDARG00000055100	88.847	87.2055	94.1852	90.07923333	96.0223	105.901	98.7893	100.2375333	0.53781622	0.682531725	0.165877157	-0.024386418
cxcr4a	non_periderm	ENSDART00000080350	ENSDARG00000057633	28.144	27.5553	26.0478	27.24903333	22.7683	23.1683	19.3871	21.77456667	3.86E-05	0.000216268	3.665007736	0.303196821
cxcr4b	non_periderm	ENSDART00000061499	ENSDARG00000041959	59.0949	60.9362	60.1338	60.05496667	52.9112	52.2042	53.6929	52.9361	4.85E-05	0.000266294	3.574638619	0.202895839
cyb5a	periderm	ENSDART00000162998	ENSDARG00000098589	38.2019	37.2679	31.8669	35.7789	19.3258	15.6744	18.7677	17.92263333	4.77E-11	6.25E-10	9.204119983	0.764318149
cyb5b	periderm	ENSDART00000172015	ENSDARG00000099774	19.4695	19.4804	19.6039	19.51793333	24.3314	28.1005	27.4701	26.634	0.000219686	0.001052673	2.977706516	-0.231035384
cycsb	periderm	ENSDART00000036456	ENSDARG00000044562	710.295	728.207	717.093	718.5316667	587.126	556.273	574.016	572.4716667	7.63E-14	1.30E-12	11.88605665	0.290760664
cyfip1	periderm	ENSDART00000065127	ENSDARG00000044345	35.8968	40.4838	45.82	40.73353333	41.7806	46.9511	46.4946	45.07543333	0.692150794	0.803785107	0.094860045	-0.020167769
cyp11c1	periderm	ENSDART00000061572	ENSDARG00000042014	0.701256	0.402171	1.0923	0.731909	1.15246	1.01448	1.77957	1.315503333	0.08646932	0.180946376	0.742450111	-0.551173424
cyp17a1	non_periderm	ENSDART00000043156	ENSDARG00000033566	1.62216	1.29986	1.62249	1.514836667	1.2067	1.44955	1.28691	1.314386667	0.131507569	0.251416375	0.59960644	0.220703349
cyp1b1	periderm	ENSDART00000126013	ENSDARG00000068934	0.45631	0.394274	0.752867	0.534483667	0.414688	0.230391	0.341835	0.328971333	0.074859542	0.161559784	0.791666736	0.550386494
cyp1d1	non_periderm	ENSDART00000051565	ENSDARG00000035569	15.3699	14.6491	14.4872	14.8354	8.16019	8.62912	7.65448	8.14793	1.18E-20	3.61E-19	18.4424928	0.68024082
cyp24a1	periderm	ENSDART00000160991	ENSDARG00000103277	2.23417	1.63707	2.11374	1.994993333	2.85959	1.99486	2.98253	2.612326667	0.290423486	0.450511255	0.346294355	-0.181690991
cyp26a1	non_periderm	ENSDART00000041728	ENSDARG00000033999	15.0195	16.3752	15.4488	15.6145	9.13292	9.58766	11.3799	10.03349333	6.51E-11	8.42E-10	9.074687909	0.523729204
cyp26b1	non_periderm	ENSDART00000110347	ENSDARG00000077121	6.55633	7.25664	8.44986	7.420943333	21.325	22.4689	20.8839	21.55926667	4.91E-64	7.54E-62	61.12262865	-0.987257969
cyp26c1	non_periderm	ENSDART00000077809	ENSDARG00000056029	18.7175	18.6161	21.6484	19.66066667	30.0738	32.1077	30.6495	30.94366667	4.42E-15	8.46E-14	13.07262964	-0.371482607
cyp27c1	non_periderm	ENSDART00000144335	ENSDARG00000092660	26.5515	27.5046	30.0529	28.03633333	42.7968	47.5357	45.2083	45.18026667	5.35E-16	1.12E-14	13.95078198	-0.395979409
cyp2aa3	periderm	ENSDART00000160199	ENSDARG00000103347	11.1204	10.4596	9.55037	10.37679	1.43838	1.50645	0.932409	1.292413	1.44E-40	1.18E-38	37.92811799	2.172683751
cyp2aa4	periderm	ENSDART00000164249	ENSDARG00000104540	1.00174	1.11989	1.29622	1.139283333	0.0670114	0.544727	0.351153	0.3209638	0.006822775	0.021978533	1.658001299	1.604350466
cyp2aa7	periderm	ENSDART00000158959	ENSDARG00000103766	8.80404	8.87365	8.34416	8.67395	5.75455	6.39344	6.51162	6.21987	0.000613525	0.002650003	2.576753634	0.406212702
cyp2aa8	periderm	ENSDART00000169821	ENSDARG00000098803	8.81949	7.77353	8.39384	8.328953333	2.34332	1.20574	1.83522	1.79476	9.57E-15	1.78E-13	12.74958	1.640956743
cyp2k16	periderm	ENSDART00000166071	ENSDARG00000102981	10.1853	10.5119	11.8485	10.84856667	3.40698	4.48414	3.56178	3.817633333	2.00E-28	9.56E-27	26.01954211	1.126255124
cyp2k8	periderm	ENSDART00000168382	ENSDARG00000101190	0.591966	1.43454	1.26673	1.097745333	0.569331	1.07396	0.714321	0.785870667	0.222979828	0.373120836	0.428150498	0.375807838
cyp2p7	non_periderm	ENSDART00000063107	ENSDARG00000042980	4.58626	4.81127	4.12437	4.5073	5.8323	7.44583	6.19474	6.490956667	0.005007572	0.016814033	1.774328105	-0.281698701
cyp2v1	periderm	ENSDART00000102913	ENSDARG00000018485	7.72686	6.95584	7.29254	7.32508	9.83576	8.65139	6.56624	8.35113	0.765308476	0.855300972	0.067881034	-0.038381568
cyp4v7	non_periderm	ENSDART00000172810	ENSDARG00000061585	1.14145	1.71215	1.91155	1.588383333	0.151674	0.105297	0	0.085657	0.000111119	0.000567174	3.246283686	2.978349433
cyr61l2	periderm	ENSDART00000162953	ENSDARG00000099985	6.2434	5.8921	6.76924	6.30158	3.54113	3.71771	3.65883	3.639223333	1.77E-15	3.54E-14	13.45099674	0.631419738
cyt1	periderm	ENSDART00000004812	ENSDARG00000092947	771.502	797.653	772.816	780.657	132.299	140.29	135.8	136.1296667	9.99E-300	9.99E-300	299.0004345	1.822439234
cyt1l	periderm	ENSDART00000105036	ENSDARG00000036832	619.904	636.314	648.272	634.83	78.4061	81.7696	75.5379	78.5712	5.59E-288	7.37E-285	284.1325325	2.163584857
cyth4b	non_periderm	ENSDART00000172039	ENSDARG00000103984	4.07279	3.92859	4.91765	4.306343333	5.03904	5.6215	4.8024	5.154313333	0.334918907	0.49766887	0.303059524	-0.104113585
daam1a	periderm	ENSDART00000162452	ENSDARG00000015059	3.55085	3.80077	3.43727	3.596296667	2.11193	2.60531	2.35947	2.358903333	8.03E-06	5.13E-05	4.289882635	0.50870019
daam2	periderm	ENSDART00000154824	ENSDARG00000028393	0.44151	1.21685	0.717058	0.791806	0.141784	0.300853	0.120449	0.187695333	0.008031932	0.025328359	1.596392947	1.443405013
dab2ipa	periderm	ENSDART00000132824	ENSDARG00000069484	8.68717	7.28536	7.79293	7.92182	10.4314	12.9948	14.1544	12.52686667	0.017376222	0.04893263	1.310401441	-0.423111112
dab2ipb	non_periderm	ENSDART00000110645	ENSDARG00000075110	3.0414	3.30564	3.67758	3.34154	3.23089	3.21198	2.70283	3.048566667	0.048097998	0.113165031	0.946287753	0.176434358
dacha	non_periderm	ENSDART00000023038	ENSDARG00000010132	20.56	20.1424	23.1743	21.29223333	26.2421	29.2988	28.5958	28.04556667	0.000211372	0.001016116	2.99305671	-0.194051067
dachc	non_periderm	ENSDART00000018827	ENSDARG00000003142	4.48328	5.93449	5.68534	5.367703333	5.86075	5.16881	5.35642	5.461993333	0.516756644	0.664166941	0.177722745	0.058226066
dachd	periderm	ENSDART00000101070	ENSDARG00000069440	2.24105	3.28576	3.15131	2.892706667	2.90097	3.14408	2.93135	2.992133333	0.772642019	0.860176553	0.0654124	0.033604093
dact1	non_periderm	ENSDART00000171966	ENSDARG00000101635	10.6035	10.9718	12.4444	11.3399	12.2391	12.1186	12.8311	12.39626667	0.889512049	0.934681537	0.029336336	-0.009188451
dand5	periderm	ENSDART00000052992	ENSDARG00000036471	10.6772	12.4065	14.7609	12.61486667	2.23834	3.42668	3.61429	3.093103333	1.13E-20	3.45E-19	18.4621809	1.486870147
dao.3	non_periderm	ENSDART00000051611	ENSDARG00000035601	0.38846	0.540126	0.61205	0.513545333	0.736012	0.543436	0.48568	0.588376	0.895894003	0.938563152	0.0275365	-0.062933213
dbf4	non_periderm	ENSDART00000065643	ENSDARG00000074796	29.4764	29.3192	30.806	29.8672	22.2087	27.5443	26.9113	25.55476667	6.88E-05	0.000366704	3.435684353	0.241542157
dbx1a	non_periderm	ENSDART00000022441	ENSDARG00000086393	13.626	15.2	14.4284	14.41813333	22.1348	22.5671	23.1916	22.63116667	5.01E-07	3.92E-06	5.406713933	-0.377173314
dbx1b	non_periderm	ENSDART00000015681	ENSDARG00000001859	4.32062	3.73853	3.91168	3.990276667	6.94697	7.84045	8.28366	7.69036	1.04E-06	7.72E-06	5.1123827	-0.580094007
dcaf12	periderm	ENSDART00000092015	ENSDARG00000063155	27.6965	27.4697	31.5441	28.90343333	41.0201	44.8287	41.3268	42.39186667	6.01E-09	6.09E-08	7.215382707	-0.30464458
dcakd	periderm	ENSDART00000088130	ENSDARG00000061638	0.968035	1.01013	1.58914	1.189101667	1.82053	2.17719	0.292994	1.430238	0.810858526	0.885042873	0.053035691	0.150348078
dck	periderm	ENSDART00000098499	ENSDARG00000044807	15.7845	15.5596	18.728	16.6907	19.0169	21.221	16.6409	18.9596	0.501545991	0.651102939	0.186350344	-0.05747251
dcun1d1	periderm	ENSDART00000163175	ENSDARG00000099642	13.7362	12.754	14.1918	13.56066667	21.9152	23.2653	21.865	22.3485	6.81E-09	6.86E-08	7.163675884	-0.423633908
dcxr	periderm	ENSDART00000023796	ENSDARG00000079271	5.69584	6.84311	5.72485	6.087933333	13.4717	15.0245	14.309	14.2684	7.81E-13	1.22E-11	10.91364017	-0.779299787
ddhd2	periderm	ENSDART00000114824	ENSDARG00000076765	3.38511	3.9316	4.04435	3.78702	4.90784	4.18433	4.68446	4.59221	0.292636121	0.452590878	0.344294204	-0.112703512
ddr2b	non_periderm	ENSDART00000147146	ENSDARG00000058695	0.0741454	0.23047	0.052113	0.118909467	0.238146	0.167904	0.0693966	0.1584822	0.620014766	0.748701836	0.125691102	-0.278798644
ddrgk1	non_periderm	ENSDART00000054057	ENSDARG00000037172	85.1049	102.7	79.3183	89.04106667	75.5427	71.6658	73.4248	73.54443333	0.034589016	0.086471326	1.063127881	0.209537746
ddx1	non_periderm	ENSDART00000023963	ENSDARG00000032117	20.2356	20.9638	24.1872	21.79553333	27.6204	22.1802	25.3385	25.04636667	0.486598883	0.639272492	0.194313983	-0.057239159
ddx10	non_periderm	ENSDART00000149507	ENSDARG00000061865	44.8519	44.2661	43.2548	44.12426667	50.0137	52.0369	49.0437	50.36476667	0.266726045	0.424119626	0.37251163	-0.050211959
ddx26b	periderm	ENSDART00000002684	ENSDARG00000017931	7.14989	8.48815	10.4536	8.697213333	15.0472	15.4423	15.3122	15.26723333	1.67E-09	1.81E-08	7.742321425	-0.491713865
ddx5	non_periderm	ENSDART00000055492	ENSDARG00000038068	669.007	616.095	596.414	627.172	631.983	599.496	583.861	605.1133333	0.093804494	0.193330959	0.713698595	0.116394182
def8	periderm	ENSDART00000150608	ENSDARG00000068208	0.894902	1.83519	2.66393	1.798007333	2.54573	0.265277	3.05466	1.955222333	0.853018396	0.91180834	0.04009644	0.180124885
degs2	periderm	ENSDART00000127996	ENSDARG00000042544	2.32984	3.09245	2.9819	2.801396667	0.447012	0.662839	0.674889	0.594913333	2.31E-15	4.55E-14	13.3419886	1.622959198
dennd5a	non_periderm	ENSDART00000060545	ENSDARG00000017006	2.15378	1.988	2.55499	2.232256667	4.6618	4.74499	4.03427	4.480353333	8.47E-14	1.44E-12	11.84163751	-0.613976217
dennd5b	non_periderm	ENSDART00000140510	ENSDARG00000003789	4.94023	5.23812	5.87233	5.350226667	4.57301	4.93195	4.94671	4.817223333	0.203367537	0.348574131	0.457704847	0.188189381
depdc7	periderm	ENSDART00000077341	ENSDARG00000055043	5.5477	6.23311	6.71419	6.165	9.22955	8.88835	8.50447	8.874123333	0.001718792	0.006606543	2.180025734	-0.288222994
deptor	periderm	ENSDART00000140469	ENSDARG00000040930	0.26292	0.535645	0.592852	0.463805667	1.2562	0.738682	0.835238	0.943373333	0.054121271	0.124450617	0.905002946	-0.654159212
derl3	periderm	ENSDART00000043251	ENSDARG00000033871	17.2092	20.9384	20.7804	19.64266667	3.31657	7.47404	8.83167	6.54076	2.91E-05	0.000167061	3.777124923	1.253390265
desma	non_periderm	ENSDART00000081550	ENSDARG00000058656	50.1764	52.6027	50.1283	50.96913333	16.9072	16.9065	20.1258	17.97983333	7.90E-51	8.58E-49	48.06651271	1.122352607
dgat1b	periderm	ENSDART00000147890	ENSDARG00000054914	3.96644	2.77662	3.38582	3.376293333	3.97198	3.38872	0.745168	2.701956	0.359225788	0.523242209	0.28129723	0.485522281
dgkza	non_periderm	ENSDART00000173565	ENSDARG00000014439	1.22289	2.92092	3.38896	2.510923333	1.21155	2.1076	2.37343	1.897526667	0.406467855	0.567162967	0.246292134	0.294940984
dhdds	non_periderm	ENSDART00000058290	ENSDARG00000039851	26.8079	30.733	25.8143	27.78506667	19.6915	21.95	20.7617	20.80106667	1.61E-05	9.70E-05	4.013228266	0.357716224
dhfr	periderm	ENSDART00000010041	ENSDARG00000004251	46.4787	47.4056	48.5424	47.47556667	74.8052	70.4289	69.3713	71.53513333	1.05E-11	1.48E-10	9.829738285	-0.332270358
dhps	periderm	ENSDART00000074068	ENSDARG00000003270	28.8002	27.4146	27.4026	27.87246667	28.0714	34.4971	29.6617	30.7434	0.820715718	0.891702357	0.049780085	-0.014427296
dhrs11a	periderm	ENSDART00000140537	ENSDARG00000046090	8.67274	11.1884	9.59167	9.817603333	4.79344	4.44715	3.06109	4.10056	6.02E-10	6.94E-09	8.15864053	0.962036234
dhrs3a	non_periderm	ENSDART00000066125	ENSDARG00000044982	7.13057	7.80402	6.65147	7.195353333	6.99062	7.49827	7.34315	7.277346667	0.506310126	0.655090691	0.183698572	0.064052955
dhrsx	periderm	ENSDART00000149786	ENSDARG00000079280	1.69802	2.40203	2.49899	2.19968	0.818183	0.728866	0.82089	0.789313	0.000692393	0.002953701	2.52963347	1.089143477
dhx38	non_periderm	ENSDART00000162978	ENSDARG00000100013	4.54897	6.52907	9.67787	6.918636667	13.0954	14.784	14.556	14.14513333	0.000410091	0.001851441	2.732490123	-0.675940091
dhx8	periderm	ENSDART00000066282	ENSDARG00000054707	28.4969	30.2608	34.5223	31.09333333	41.3148	48.5581	46.8495	45.57413333	1.00E-10	1.27E-09	8.896196279	-0.298676267
dhx9	non_periderm	ENSDART00000134918	ENSDARG00000079725	6.98927	9.89819	10.758	9.215153333	17.2067	16.8204	17.6556	17.22756667	6.84E-07	5.23E-06	5.281498311	-0.557813153
diaph2	non_periderm	ENSDART00000147443	ENSDARG00000076060	2.44953	1.93819	3.27894	2.555553333	1.73437	2.12615	2.02771	1.962743333	0.018553939	0.051628604	1.287109618	0.330278949
dio2	non_periderm	ENSDART00000146276	ENSDARG00000094857	0.0254743	0.0949367	0.18626	0.102223667	0.251262	0.0878838	0.283932	0.2076926	0.274370619	0.432920256	0.363592093	-0.728169063
dip2a	periderm	ENSDART00000115030	ENSDARG00000078058	6.89056	9.1492	12.7311	9.590286667	14.9522	17.4596	15.0056	15.8058	0.003676261	0.012899696	1.889420524	-0.443266669
dip2ba	periderm	ENSDART00000019521	ENSDARG00000005350	18.2803	18.0737	22.3273	19.56043333	21.1498	20.9904	20.991	21.04373333	0.872089222	0.924486216	0.03409956	0.007767499
dis3l	periderm	ENSDART00000075176	ENSDARG00000053200	3.09856	3.88818	4.7762	3.92098	9.37143	10.6971	8.93328	9.66727	2.20E-15	4.35E-14	13.36151074	-0.830897708
disp1	non_periderm	ENSDART00000065231	ENSDARG00000044417	2.99316	3.63842	5.44495	4.02551	4.58882	5.05585	5.15554	4.933403333	0.319229652	0.481080207	0.317782511	-0.149085319
disp2	non_periderm	ENSDART00000062887	ENSDARG00000042846	0.0054383	0.169063	0.0550718	0.076524367	0.0189756	0.0302539	0.0474018	0.032210433	0.698339634	0.808336184	0.09240798	0.349690082
dkk1b	non_periderm	ENSDART00000122271	ENSDARG00000045219	2.8877	3.2314	3.27658	3.131893333	2.01176	1.74041	2.04728	1.93315	0.005829264	0.019148765	1.717859231	0.54829757
dla	non_periderm	ENSDART00000012104	ENSDARG00000010791	37.3432	34.1154	30.036	33.83153333	35.9466	35.5873	38.0672	36.5337	0.969814198	0.981965049	0.00790397	0.003700615
dlb	non_periderm	ENSDART00000019259	ENSDARG00000004232	15.5927	15.1261	16.5164	15.74506667	16.5676	14.9015	14.0357	15.16826667	0.040027969	0.097648722	1.010333436	0.121554543
dlc	non_periderm	ENSDART00000018514	ENSDARG00000002336	23.1451	23.6666	25.4842	24.09863333	22.1601	25.4777	22.8096	23.48246667	0.025652848	0.067460436	1.170950856	0.110374768
dld	non_periderm	ENSDART00000099224	ENSDARG00000020219	38.615	39.4719	44.6599	40.9156	60.1418	59.3296	61.1805	60.2173	9.01E-13	1.40E-11	10.85387196	-0.305257691
dlg2	non_periderm	ENSDART00000163402	ENSDARG00000099323	0	1.18048	0.647398	0.609292667	0.63559	0.540277	0.0593272	0.4117314	0.98593664	0.992289612	0.003361555	0.019773432
dlg3	periderm	ENSDART00000074720	ENSDARG00000076796	13.6472	14.1841	15.0154	14.28223333	17.251	19.786	18.301	18.446	0.003994312	0.013847882	1.858616646	-0.172758108
dlgap1b	non_periderm	ENSDART00000142971	ENSDARG00000037415	4.69226	5.42052	6.20779	5.44019	5.05013	4.83386	4.30238	4.72879	0.03881584	0.09515452	1.021570577	0.214534861
dlx2a	non_periderm	ENSDART00000111386	ENSDARG00000079964	15.5085	15.9838	18.3991	16.63046667	11.0934	10.9308	13.0961	11.70676667	1.09E-08	1.06E-07	6.974694135	0.428686774
dlx3b	non_periderm	ENSDART00000017191	ENSDARG00000014626	45.9358	45.493	45.8293	45.7527	34.7533	35.8319	34.0878	34.891	3.57E-10	4.23E-09	8.373659633	0.347131033
dlx4b	periderm	ENSDART00000105887	ENSDARG00000071560	4.95873	4.70463	4.57187	4.745076667	10.662	11.0462	11.5033	11.0705	1.03E-11	1.44E-10	9.841637508	-0.773569737
dlx6a	non_periderm	ENSDART00000102778	ENSDARG00000042291	0.635435	0.585956	0.203524	0.474971667	0.246001	0.505884	0.582236	0.444707	0.842458226	0.90540869	0.043155342	0.091388254
dmbx1a	non_periderm	ENSDART00000128535	ENSDARG00000009922	2.90968	3.19955	3.93974	3.349656667	5.22387	7.81429	6.97063	6.669596667	1.05E-05	6.53E-05	4.185086819	-0.600464651
dmbx1b	non_periderm	ENSDART00000026693	ENSDARG00000002510	0.680928	0.845042	1.14863	0.891533333	3.66341	3.29087	3.37959	3.444623333	1.94E-11	2.66E-10	9.575118363	-1.28902247
dmrt1	non_periderm	ENSDART00000126066	ENSDARG00000007349	0.696015	0.394608	0.887894	0.659505667	0.673502	0.365166	0.586411	0.541693	0.755741124	0.848603276	0.071295296	0.220669023
dmrt2a	non_periderm	ENSDART00000010786	ENSDARG00000015072	23.5985	25.0245	24.1566	24.25986667	27.6613	26.9809	28.0516	27.5646	0.398179323	0.560251366	0.251617076	-0.048595467
dmrt2b	periderm	ENSDART00000102391	ENSDARG00000070013	0.815173	1.59702	0.916671	1.109621333	1.09227	1.02657	1.1614	1.093413333	0.855871221	0.914113485	0.038999884	0.045055272
dmrt3a	non_periderm	ENSDART00000051146	ENSDARG00000035290	0.486889	0.384792	0.331909	0.401196667	1.30035	1.3409	0.638561	1.093270333	0.001492953	0.005835478	2.233923564	-0.871008597
dnaja2	non_periderm	ENSDART00000159869	ENSDARG00000104066	153.806	152.485	159.423	155.238	211.118	218.092	212.467	213.8923333	4.19E-10	4.93E-09	8.307153081	-0.241640588
dnajb6a	non_periderm	ENSDART00000019417	ENSDARG00000004680	12.0211	11.262	11.2262	11.5031	34.3582	36.9424	39.9098	37.07013333	1.50E-49	1.59E-47	46.79860288	-1.094610072
dnali1	non_periderm	ENSDART00000101898	ENSDARG00000069815	5.2579	4.84096	3.88328	4.660713333	4.60938	2.58852	2.27898	3.15896	0.048494654	0.1139402	0.943323023	0.490219978
dock5	periderm	ENSDART00000135834	ENSDARG00000001968	1.03484	1.15296	1.46525	1.217683333	0.767573	0.576392	0.478247	0.607404	9.43E-07	7.05E-06	5.151810883	0.786770453
dock9a	periderm	ENSDART00000166998	ENSDARG00000105065	16.5941	18.4958	27.3888	20.82623333	10.7398	13.3452	11.5105	11.86516667	5.87E-06	3.83E-05	4.416801226	0.607039593
dohh	periderm	ENSDART00000018515	ENSDARG00000003564	84.1144	83.0751	80.7494	82.6463	91.9026	91.4304	91.0099	91.44763333	0.535561841	0.680696252	0.167046641	-0.030816115
dok1b	periderm	ENSDART00000172046	ENSDARG00000099177	1.22212	1.34231	1.01885	1.194426667	1.02622	1.71995	1.01489	1.253686667	0.762593339	0.8531501	0.068974554	0.057589502
dok7	periderm	ENSDART00000084665	ENSDARG00000060236	3.72679	3.3284	4.62327	3.89282	1.74022	1.47864	2.1164	1.77842	6.14E-09	6.21E-08	7.2069084	0.864209925
dpf3	non_periderm	ENSDART00000123387	ENSDARG00000025309	8.6093	7.34379	7.87707	7.943386667	8.43019	8.63955	9.19367	8.75447	0.839307163	0.903403407	0.044118276	-0.024132582
dph1	non_periderm	ENSDART00000140214	ENSDARG00000057973	25.3531	23.5802	24.1417	24.35833333	20.2959	21.1956	23.5452	21.6789	0.002529941	0.009299778	2.031527419	0.194944265
dpp6b	periderm	ENSDART00000037848	ENSDARG00000024744	0.727923	0.581812	0.94333	0.751021667	0.672545	0.604931	0.533704	0.603726667	0.097270788	0.198852313	0.701469353	0.285572841
dpysl3	non_periderm	ENSDART00000065097	ENSDARG00000002587	2.66914	3.58647	4.50553	3.587046667	4.07497	4.50022	3.48049	4.01856	0.744304784	0.840487518	0.075468732	-0.045616347
dpysl5a	non_periderm	ENSDART00000010274	ENSDARG00000011141	20.3637	19.6914	22.3645	20.80653333	32.8109	32.3218	32.434	32.52223333	3.16E-13	5.12E-12	11.29073004	-0.364641384
dr1	periderm	ENSDART00000172051	ENSDARG00000105098	54.5019	53.0765	53.1037	53.5607	75.0266	78.7773	75.2929	76.3656	7.12E-10	8.12E-09	8.090443971	-0.273972147
dtna	non_periderm	ENSDART00000105680	ENSDARG00000031015	1.11229	1.72609	2.39596	1.74478	3.68114	5.04707	4.5567	4.428303333	2.37E-05	0.000139139	3.856551122	-0.887572542
dtnbp1b	non_periderm	ENSDART00000104008	ENSDARG00000055206	11.2226	11.886	14.8409	12.64983333	11.3608	13.1334	14.6669	13.0537	0.837794907	0.902342257	0.044628704	0.023505869
dub	periderm	ENSDART00000083449	ENSDARG00000059774	16.4901	19.5375	16.5598	17.52913333	7.17717	7.71865	6.37141	7.089076667	4.59E-28	2.13E-26	25.6716204	0.978409815
duox	periderm	ENSDART00000090727	ENSDARG00000062632	0.241743	0.276582	0.46786	0.328728333	0.0224976	0.0403715	0	0.020956367	0.000148609	0.000739244	3.131212192	3.148303085
dusp1	non_periderm	ENSDART00000160712	ENSDARG00000100515	288.559	278.013	294.039	286.8703333	238.63	254.293	248.061	246.9946667	7.38E-10	8.40E-09	8.075720714	0.230287246
dusp11	non_periderm	ENSDART00000134890	ENSDARG00000038156	11.5375	11.1553	14.1802	12.291	14.3501	14.563	13.7719	14.22833333	0.207213193	0.35361684	0.451467061	-0.066860331
dusp14	periderm	ENSDART00000080338	ENSDARG00000057625	8.93415	10.2096	9.25478	9.466176667	7.51183	7.07063	7.66359	7.41535	0.002105146	0.007921434	2.101196192	0.315572938
dusp2	non_periderm	ENSDART00000163598	ENSDARG00000098108	15.6267	15.6424	15.4636	15.57756667	14.3162	13.9084	12.7092	13.6446	0.001108472	0.004476628	2.349048993	0.214219578
dusp6	non_periderm	ENSDART00000104496	ENSDARG00000070914	72.9226	75.8336	80.8703	76.54216667	71.6648	81.3424	82.5181	78.50843333	0.152149936	0.281079189	0.551171308	0.058024713
dusp7	periderm	ENSDART00000170778	ENSDARG00000101413	22.1169	23.231	24.1098	23.15256667	27.3605	27.4787	25.0055	26.6149	0.271147787	0.429269071	0.367270401	-0.055882239
dync2li1	non_periderm	ENSDART00000058147	ENSDARG00000039770	11.2166	9.87906	8.1729	9.756186667	13.9831	15.0356	12.1442	13.72096667	0.041109647	0.0997273	1.001185939	-0.271096021
dyrk2	periderm	ENSDART00000145069	ENSDARG00000094646	5.75769	6.95637	9.15705	7.29037	8.07438	5.87782	9.31063	7.754276667	0.900776035	0.941406784	0.026222676	0.022897011
dysf	non_periderm	ENSDART00000082620	ENSDARG00000007370	0.454082	0.575097	0.62803	0.552403	0.529842	0.552473	0.542509	0.541608	0.549348996	0.691726768	0.160065418	0.096992941
e2f5	periderm	ENSDART00000056679	ENSDARG00000038812	4.71911	5.84741	5.7977	5.45474	4.85291	4.75912	4.40461	4.672213333	0.01704886	0.048159276	1.317320051	0.231200351
ebf1a	non_periderm	ENSDART00000172171	ENSDARG00000099849	7.09869	9.53879	8.38213	8.33987	7.14803	10.172	9.05211	8.790713333	0.791143738	0.873023389	0.058974121	0.032241182
ebf1b	non_periderm	ENSDART00000100508	ENSDARG00000069196	1.10902	1.08062	1.07844	1.08936	0.873306	1.22135	1.29265	1.129102	0.700521503	0.809940319	0.091546981	0.06060286
ebp	non_periderm	ENSDART00000019045	ENSDARG00000046098	32.412	36.6107	38.8497	35.95746667	31.776	31.7955	31.7667	31.7794	0.000718165	0.003050854	2.515578575	0.19705767
echdc2	non_periderm	ENSDART00000014721	ENSDARG00000016607	9.14222	7.041	7.56163	7.91495	6.7475	5.81988	6.3612	6.309526667	0.007412289	0.023638079	1.62638782	0.295820888
eci1	periderm	ENSDART00000017962	ENSDARG00000018002	58.7974	60.8295	58.0751	59.234	42.1475	40.1011	44.3941	42.21423333	1.13E-11	1.58E-10	9.801342913	0.408015537
edil3b	non_periderm	ENSDART00000086227	ENSDARG00000060877	1.12558	1.18394	1.74267	1.35073	1.51258	1.52917	1.70667	1.582806667	0.436975886	0.595818411	0.224886081	-0.091558596
edn1	non_periderm	ENSDART00000105146	ENSDARG00000036912	2.44393	2.06448	3.89505	2.801153333	1.89256	2.15418	4.31173	2.786156667	0.726366948	0.828339303	0.081791732	0.107043912
edn2	periderm	ENSDART00000103784	ENSDARG00000070578	18.0633	16.993	17.3512	17.46916667	4.47037	4.72052	3.95976	4.38355	2.65E-57	3.51E-55	54.45469288	1.460750137
eea1	periderm	ENSDART00000141800	ENSDARG00000062868	2.77902	3.27092	2.60311	2.88435	3.27226	2.50453	1.74034	2.50571	0.220441244	0.369968123	0.431835694	0.249499131
eed	periderm	ENSDART00000162928	ENSDARG00000099640	132.579	143.393	145.548	140.5066667	137.767	145.471	148.421	143.8863333	0.217263313	0.366205087	0.436275627	0.05158864
eef1a1b	periderm	ENSDART00000075340	ENSDARG00000069951	0.0894582	0.222259	0.158132	0.1566164	0.0296588	0.0881739	0.0949575	0.070930067	0.262556946	0.419507903	0.377259853	0.844578758
eef1da	periderm	ENSDART00000158064	ENSDARG00000102291	50.2732	53.6644	41.3613	48.43296667	37.869	34.6072	38.4223	36.96616667	0.004057387	0.014039711	1.852641832	0.327124412
eef1g	periderm	ENSDART00000078522	ENSDARG00000056119	291.442	280.948	290.022	287.4706667	335.152	334.81	342.588	337.5166667	0.024717476	0.065503703	1.183734148	-0.085307672
ef1	periderm	ENSDART00000122369	ENSDARG00000020759	22.4442	27.7387	30.1159	26.76626667	24.8008	25.913	23.2888	24.66753333	0.017997029	0.050384439	1.297703573	0.159348288
efcab11	non_periderm	ENSDART00000136078	ENSDARG00000043740	7.37607	6.9376	8.16305	7.49224	7.32144	5.6271	5.60466	6.1844	0.071815629	0.156316741	0.805994508	0.260348704
efcab2	periderm	ENSDART00000155660	ENSDARG00000074323	24.1832	29.1923	22.737	25.37083333	19.736	16.0794	13.7791	16.5315	0.000651728	0.002797316	2.553258471	0.467191074
efhb	non_periderm	ENSDART00000101629	ENSDARG00000069703	0.536786	0.304726	0.63826	0.493257333	1.28031	1.45629	1.87672	1.537773333	1.16E-05	7.19E-05	4.14327111	-1.079532327
efhd1	periderm	ENSDART00000063779	ENSDARG00000043446	25.5945	29.8795	27.1991	27.5577	18.653	19.4024	20.2302	19.42853333	9.15E-09	9.06E-08	7.042871802	0.419972904
efhd2	periderm	ENSDART00000047008	ENSDARG00000055759	30.3589	29.224	35.5697	31.71753333	16.4945	18.6279	16.3099	17.1441	5.17E-38	3.80E-36	35.4202164	0.695939574
efna3b	non_periderm	ENSDART00000161087	ENSDARG00000098295	7.02745	8.67119	8.9426	8.213746667	15.98	19.6214	19.3307	18.3107	1.44E-19	4.03E-18	17.39469495	-0.723000098
efna5b	non_periderm	ENSDART00000160797	ENSDARG00000098625	4.2138	5.37808	5.05718	4.88302	9.97694	11.1854	9.16985	10.11073	8.56E-08	7.48E-07	6.126098402	-0.660298776
efnb2a	periderm	ENSDART00000026011	ENSDARG00000020164	23.5025	26.3354	29.7576	26.53183333	30.6978	34.9752	29.9956	31.88953333	0.049645207	0.11610725	0.935140661	-0.101588253
efnb2b	non_periderm	ENSDART00000085203	ENSDARG00000074050	81.9247	83.4445	93.6587	86.34263333	124.938	127.8	126.183	126.307	1.38E-11	1.91E-10	9.718966633	-0.308834804
efnb3a	non_periderm	ENSDART00000079514	ENSDARG00000044029	6.30767	5.70577	8.5112	6.841546667	9.29107	11.6346	9.96278	10.29615	0.001759113	0.006738976	2.17140609	-0.339299543
efnb3b	non_periderm	ENSDART00000062003	ENSDARG00000042277	21.7186	23.7829	24.9872	23.49623333	20.1802	22.1393	24.9844	22.43463333	0.05128032	0.119125641	0.923994749	0.127480255
egfra	periderm	ENSDART00000147261	ENSDARG00000013847	3.91627	3.24091	3.60399	3.587056667	3.24144	3.3165	2.81242	3.123453333	0.039557966	0.096700871	1.014569614	0.220553739
egr1	periderm	ENSDART00000054460	ENSDARG00000037421	62.8442	65.2983	65.4756	64.53936667	54.7096	58.5204	55.6756	56.30186667	1.52E-07	1.28E-06	5.89279003	0.219596931
egr2a	periderm	ENSDART00000137015	ENSDARG00000044098	18.5708	19.0726	18.1353	18.5929	15.9352	12.1652	17.4991	15.19983333	0.02533926	0.066801641	1.175212869	0.285862121
egr2b	non_periderm	ENSDART00000062855	ENSDARG00000042826	59.2605	60.2093	59.4318	59.63386667	67.5263	65.0183	69.268	67.27086667	0.369014866	0.532383626	0.27377531	-0.040909398
ehd1a	non_periderm	ENSDART00000173209	ENSDARG00000098853	6.74092	7.36101	6.52494	6.875623333	6.02511	6.19342	5.47819	5.898906667	0.153936704	0.283482982	0.547473007	0.236049422
ehmt1a	periderm	ENSDART00000126018	ENSDARG00000068157	8.7225	8.13941	11.5089	9.456936667	21.1221	23.9577	22.6666	22.58213333	1.39E-21	4.52E-20	19.34486157	-0.796528551
eif1b	periderm	ENSDART00000132874	ENSDARG00000012688	348.607	316.308	307.631	324.182	355.127	335.069	334.75	341.6486667	0.784890407	0.869214679	0.060872948	0.01927868
eif2ak3	non_periderm	ENSDART00000142997	ENSDARG00000062139	5.62616	5.83055	9.17028	6.875663333	8.50393	9.9487	9.44301	9.298546667	0.06857917	0.150764949	0.821699615	-0.241413275
eif2b4	non_periderm	ENSDART00000125830	ENSDARG00000014004	52.0747	52.8585	52.0952	52.3428	57.9845	58.8152	64.0197	60.27313333	0.213493609	0.361747844	0.441594049	-0.060458517
eif3s10	non_periderm	ENSDART00000111462	ENSDARG00000076815	86.1969	99.1954	106.935	97.44243333	134.516	140.394	138.922	137.944	1.28E-11	1.78E-10	9.749579998	-0.266640073
eif4a1a	non_periderm	ENSDART00000058913	ENSDARG00000092115	498.088	516.599	560.454	525.047	893.755	952.388	947.562	931.235	1.32E-36	9.06E-35	34.0428718	-0.493102946
eif4bb	periderm	ENSDART00000021520	ENSDARG00000010194	274.298	287.282	288.699	283.4263333	358.266	357.195	348.599	354.6866667	0.000108975	0.000557342	3.253878228	-0.145349213
eif4e1c	non_periderm	ENSDART00000036718	ENSDARG00000012274	111.575	110.868	106.688	109.7103333	107.394	100.066	104.327	103.929	0.016965391	0.047968161	1.319046931	0.132225345
eif4e2rs1	non_periderm	ENSDART00000160207	ENSDARG00000015835	155.316	159.869	162.454	159.213	163.262	141.47	146.543	150.425	0.020071368	0.055067916	1.259101359	0.129366266
eif4ebp1	periderm	ENSDART00000064032	ENSDARG00000043608	465.84	447.219	426.447	446.502	464.332	453.809	457.275	458.472	0.421748187	0.582278686	0.234869107	0.046494663
ek1	non_periderm	ENSDART00000105774	ENSDARG00000020080	6.66359	7.60185	9.16542	7.810286667	13.5178	15.8313	13.6144	14.32116667	3.99E-13	6.41E-12	11.19314197	-0.527436826
elavl3	non_periderm	ENSDART00000013717	ENSDARG00000014420	55.6831	67.3697	81.9812	68.34466667	102.374	115.206	121.238	112.9393333	4.59E-06	3.04E-05	4.517126416	-0.443684123
elf3	periderm	ENSDART00000149460	ENSDARG00000077982	14.6658	13.4422	14.8028	14.3036	9.97966	10.8261	11.2456	10.68378667	5.06E-07	3.95E-06	5.403402904	0.371099133
elk3	periderm	ENSDART00000149218	ENSDARG00000018688	31.1903	32.0035	33.1539	32.1159	26.5477	27.398	31.0733	28.33966667	0.00013377	0.000671622	3.172875086	0.207424255
ell2	periderm	ENSDART00000102408	ENSDARG00000006251	14.0676	14.7627	17.2841	15.37146667	13.0214	13.173	11.3523	12.51556667	1.79E-07	1.49E-06	5.826813732	0.288128167
elmo1	non_periderm	ENSDART00000172618	ENSDARG00000098753	10.1898	12.0562	13.3465	11.86416667	18.1027	19.6734	19.0816	18.95256667	2.43E-08	2.28E-07	6.642065153	-0.390571686
elna	periderm	ENSDART00000160773	ENSDARG00000099634	0.0437818	0.0472238	0.0422239	0.044409833	0.0290907	0.0173822	0.0389166	0.028463167	0.564853341	0.704375558	0.152195723	0.516955891
elovl1a	periderm	ENSDART00000163137	ENSDARG00000099960	17.0891	16.8838	15.0828	16.3519	5.03089	5.8052	4.26851	5.034866667	1.78E-33	1.07E-31	30.97061622	1.25977001
elovl1b	periderm	ENSDART00000169052	ENSDARG00000103735	10.5068	12.5874	10.4591	11.18443333	6.56969	5.04048	5.77515	5.795106667	2.88E-10	3.46E-09	8.460923901	0.736564508
elovl6	periderm	ENSDART00000105602	ENSDARG00000004402	8.15927	8.52661	8.73626	8.474046667	8.9127	8.35127	8.15427	8.472746667	0.354069615	0.517998815	0.285671234	0.079291088
elovl6l	periderm	ENSDART00000067537	ENSDARG00000038639	7.50608	5.20856	6.89445	6.536363333	0.638445	0.673099	0.868289	0.726611	9.91E-52	1.10E-49	48.95860731	2.266741974
elovl7a	periderm	ENSDART00000133514	ENSDARG00000069279	8.86028	8.99087	8.34838	8.733176667	0.809918	1.04826	1.11826	0.992146	1.40E-54	1.70E-52	51.76955108	2.252823927
elp4	non_periderm	ENSDART00000002498	ENSDARG00000008852	24.5671	26.9411	22.5389	24.68236667	26.3667	27.2625	22.6508	25.42666667	0.609282482	0.740274541	0.130607186	0.0463848
emilin1a	non_periderm	ENSDART00000128895	ENSDARG00000024537	2.74882	3.20997	3.23575	3.064846667	5.09395	4.19459	5.03262	4.77372	0.000500856	0.002211589	2.655295579	-0.357733042
emp2	non_periderm	ENSDART00000065495	ENSDARG00000044588	90.8799	82.5401	89.2394	87.55313333	59.1024	64.8222	62.1514	62.02533333	9.97E-24	3.68E-22	21.43415218	0.426554739
emx3	non_periderm	ENSDART00000022236	ENSDARG00000020417	9.85211	10.1525	9.00728	9.67063	27.0994	24.5353	26.6994	26.11136667	4.88E-31	2.60E-29	28.58502665	-0.91081824
endog	non_periderm	ENSDART00000081819	ENSDARG00000058865	29.1157	29.9236	25.1573	28.06553333	18.2125	17.5729	18.5471	18.11083333	4.44E-09	4.57E-08	7.3400838	0.508143264
eng1b	non_periderm	ENSDART00000164701	ENSDARG00000098730	5.90138	3.97829	5.82338	5.23435	2.63357	3.52242	2.96169	3.039226667	2.32E-05	0.00013651	3.864835533	0.609794762
eng2a	non_periderm	ENSDART00000031700	ENSDARG00000026599	1.24355	1.2096	1.05435	1.169166667	3.56991	3.17112	3.16698	3.30267	2.53E-14	4.53E-13	12.3439018	-0.954371168
eno1a	non_periderm	ENSDART00000009337	ENSDARG00000022456	18.56	18.3487	19.0267	18.64513333	11.3611	9.82587	9.01532	10.06743	2.97E-20	8.83E-19	18.0540393	0.699337551
eno1b	periderm	ENSDART00000142492	ENSDARG00000013750	0.322805	0.275802	0.514026	0.370877667	0.687451	1.02984	0.403593	0.706961333	0.67643955	0.792357409	0.101078877	-0.52286671
enpp6	periderm	ENSDART00000059231	ENSDARG00000040469	0.133402	0.117311	0.187413	0.146042	0.108732	0.223507	0.143044	0.158427667	0.961384684	0.977134293	0.010045745	0.02395061
entpd3	non_periderm	ENSDART00000129068	ENSDARG00000035309	0.13245	0.0987154	0.372469	0.201211467	0	0	0.0163968	0.0054656	0.011958676	0.035575338	1.448850965	2.791931913
entpd6	non_periderm	ENSDART00000035432	ENSDARG00000008757	56.9483	58.2565	58.5209	57.90856667	56.2966	55.617	55.6221	55.84523333	0.022244893	0.059982217	1.221977486	0.113003806
eny2	non_periderm	ENSDART00000102482	ENSDARG00000070046	578.99	598.529	505.744	561.0876667	569.926	506.369	513.019	529.7713333	0.365455921	0.529092458	0.276468429	0.078832194
eomesb	periderm	ENSDART00000171109	ENSDARG00000104243	0.970979	1.0288	1.10383	1.034536333	1.56153	1.52737	1.2696	1.452833333	0.112943153	0.223613252	0.650502462	-0.253958703
ep300b	non_periderm	ENSDART00000156459	ENSDARG00000061108	5.643	7.15653	7.92567	6.9084	10.2092	10.2344	8.89821	9.780603333	0.002078463	0.007835932	2.105909341	-0.268634304
epas1a	periderm	ENSDART00000149198	ENSDARG00000008697	1.35135	2.30333	2.70256	2.11908	1.27093	1.43529	1.46389	1.390036667	0.013221659	0.038762634	1.411586719	0.467163099
epb41l4b	periderm	ENSDART00000087537	ENSDARG00000061398	3.36601	2.94715	4.17399	3.495716667	2.96045	3.86011	3.36294	3.3945	0.397708637	0.55978815	0.251976299	0.103812117
epb41l5	non_periderm	ENSDART00000101276	ENSDARG00000032324	22.9041	25.6086	30.557	26.35656667	29.7817	30.4499	28.6578	29.6298	0.482119742	0.635262821	0.197046561	-0.039682806
epdl1	periderm	ENSDART00000111531	ENSDARG00000076386	0.190608	0.253666	0.245032	0.229768667	0.379061	0.244015	0.1011	0.241392	0.766653762	0.856213308	0.067418026	0.146728925
epha4b	non_periderm	ENSDART00000170089	ENSDARG00000011600	10.3016	15.2752	17.2549	14.27723333	23.8471	30.1497	26.2594	26.75206667	6.99E-05	0.000371732	3.429770052	-0.563157863
epha4l	non_periderm	ENSDART00000004338	ENSDARG00000010767	1.88226	1.73126	2.28181	1.96511	1.46123	2.13216	1.74901	1.7808	0.085351866	0.179123734	0.746846866	0.189797666
epha7	non_periderm	ENSDART00000159122	ENSDARG00000004635	18.7286	20.9383	23.5472	21.07136667	22.6978	23.9738	21.9812	22.88426667	0.977938155	0.987308884	0.005546955	-0.001330577
ephb2b	non_periderm	ENSDART00000169360	ENSDARG00000021539	1.2174	2.21825	2.59459	2.01008	3.44912	3.56006	3.47246	3.49388	0.010443727	0.031658324	1.499512081	-0.525863375
ephb4a	non_periderm	ENSDART00000157810	ENSDARG00000100725	40.3274	45.4783	56.4378	47.4145	74.3634	81.2196	79.5377	78.37356667	1.47E-09	1.61E-08	7.793174124	-0.429232035
ephb4b	non_periderm	ENSDART00000097644	ENSDARG00000027112	24.7614	22.4076	24.6334	23.93413333	23.4065	27.2763	24.3774	25.02006667	0.436918997	0.595786465	0.224909367	0.04059754
eppk1	periderm	ENSDART00000162408	ENSDARG00000096359	0.896451	1.24102	1.04193	1.059800333	0	0.0140179	0	0.004672633	2.91E-11	3.92E-10	9.406713933	6.160258021
eprs	periderm	ENSDART00000075743	ENSDARG00000060494	30.2254	33.3432	44.5762	36.04826667	44.6731	50.6823	45.3685	46.90796667	0.034657811	0.086620605	1.062378787	-0.190409642
eps8l1	periderm	ENSDART00000080749	ENSDARG00000057984	4.40045	4.63599	4.76399	4.600143333	0.670495	0.316345	0.711782	0.566207333	2.27E-16	4.89E-15	14.31069114	2.219997832
erbb3a	periderm	ENSDART00000160128	ENSDARG00000006202	0.403034	0.405734	0.655063	0.487943667	0.516838	0.667323	0.458399	0.54752	0.789951081	0.872198818	0.059384506	-0.043508322
erbb4b	non_periderm	ENSDART00000163635	ENSDARG00000089536	0	0.0460876	0.18484	0.076975867	0.135559	0.262778	0.0678718	0.155402933	0.248604731	0.403266452	0.394407906	-1.168976892
erf	non_periderm	ENSDART00000151405	ENSDARG00000063417	21.4792	20.5202	27.6684	23.2226	37.039	37.444	38.1555	37.54616667	5.03E-05	0.000275169	3.560400494	-0.460392923
erfl3	non_periderm	ENSDART00000091183	ENSDARG00000062801	5.1884	6.1884	6.10038	5.825726667	8.19774	8.77037	7.07245	8.01352	0.000943092	0.003880908	2.411066652	-0.231863875
erg	periderm	ENSDART00000108780	ENSDARG00000077304	3.88687	5.66234	4.35064	4.633283333	6.6058	8.23363	7.85588	7.565103333	0.001054477	0.004285782	2.367969923	-0.416631675
ergic3	periderm	ENSDART00000055511	ENSDARG00000038074	58.238	53.7223	66.4523	59.47086667	63.1103	64.7341	65.1568	64.33373333	0.948982523	0.970094027	0.013186169	-0.003404259
erh	non_periderm	ENSDART00000101974	ENSDARG00000032866	801.678	787.182	758.64	782.5	785.891	735.104	743.416	754.8036667	0.066548929	0.147265298	0.831899579	0.09761259
erp44	non_periderm	ENSDART00000027545	ENSDARG00000019008	33.684	37.2022	36.7292	35.8718	33.9326	32.8491	36.3897	34.39046667	0.052692634	0.121794645	0.914371806	0.121579731
esama	periderm	ENSDART00000115251	ENSDARG00000077039	4.18326	3.95488	4.97245	4.370196667	5.12502	6.18957	5.38407	5.56622	0.135916699	0.257762567	0.588780152	-0.165315848
esr2a	non_periderm	ENSDART00000131069	ENSDARG00000016454	0.683822	0.642472	0.679894	0.668729333	0.656096	0.893341	0.642357	0.730598	0.982112902	0.989952014	0.004385856	0.005760998
esr2b	non_periderm	ENSDART00000141570	ENSDARG00000034181	2.84075	2.79033	3.28427	2.971783333	3.30369	3.06905	3.92939	3.434043333	0.74763769	0.84290605	0.074220829	-0.112468827
esrp1	periderm	ENSDART00000103431	ENSDARG00000011245	10.4612	10.5368	12.2693	11.0891	9.94761	9.56795	9.21028	9.57528	0.000360083	0.001647599	2.78314848	0.228093859
esrrb	non_periderm	ENSDART00000166976	ENSDARG00000100847	0.799728	0.991999	0.92568	0.905802333	1.16966	1.37986	1.56047	1.369996667	0.211675268	0.359388779	0.444435487	-0.333730906
esrrd	non_periderm	ENSDART00000125432	ENSDARG00000015064	0.442828	0.430133	0.411396	0.428119	0.869529	0.396211	0.711865	0.659201667	0.409607787	0.570148692	0.244011868	-0.299232736
esrrga	non_periderm	ENSDART00000009104	ENSDARG00000004861	2.12868	2.52776	3.86405	2.840163333	4.49463	5.24199	5.28644	5.007686667	0.000806485	0.003378489	2.471277491	-0.516499601
esyt3	periderm	ENSDART00000027443	ENSDARG00000006422	2.36644	2.60549	2.46018	2.47737	1.04985	1.14503	0.92898	1.041286667	4.21E-12	6.16E-11	10.21041929	0.949036089
ethe1	periderm	ENSDART00000043403	ENSDARG00000005713	2.05234	1.85429	2.78441	2.230346667	2.76146	2.07219	2.22195	2.351866667	0.939218648	0.964808869	0.015558713	0.0128649
etv2	periderm	ENSDART00000045403	ENSDARG00000053868	84.6603	88.2173	84.0051	85.62756667	82.6229	84.8347	86.1258	84.5278	0.061771155	0.13848249	0.858605136	0.087295681
etv5a	non_periderm	ENSDART00000126015	ENSDARG00000069763	46.0985	47.026	55.181	49.43516667	47.9578	51.9746	49.3682	49.76686667	0.095886828	0.196587319	0.7064445	0.073838634
etv5b	non_periderm	ENSDART00000065361	ENSDARG00000044511	345.792	345.454	373.806	355.0173333	381.822	423.69	418.237	407.9163333	0.135275878	0.256752362	0.590485552	-0.05638659
evla	non_periderm	ENSDART00000138346	ENSDARG00000035650	7.81049	7.75499	8.06286	7.876113333	11.0742	10.2662	9.33969	10.22669667	0.176536435	0.314136587	0.502881479	-0.20817051
ewsr1b	periderm	ENSDART00000003998	ENSDARG00000020465	251.488	281.601	310.135	281.0746667	424.38	445.911	442.934	437.7416667	1.36E-22	4.68E-21	20.32975415	-0.366934255
exo1	periderm	ENSDART00000079390	ENSDARG00000056832	20.0006	21.472	21.7518	21.0748	29.6232	33.4674	33.5111	32.20056667	6.56E-11	8.47E-10	9.07211659	-0.3409826
exoc6	non_periderm	ENSDART00000125230	ENSDARG00000020521	7.97622	7.71654	8.38348	8.025413333	10.5957	10.5334	10.828	10.65236667	0.001858937	0.00708481	2.149671792	-0.19976216
exoc6b	non_periderm	ENSDART00000167326	ENSDARG00000098874	19.4659	18.1412	21.6101	19.73906667	25.7477	29.3415	23.9156	26.33493333	0.000423377	0.001903701	2.720401262	-0.202997063
exoc8	periderm	ENSDART00000092180	ENSDARG00000063211	1.91449	3.60478	3.57156	3.030276667	5.57611	5.92917	5.01013	5.505136667	0.004282512	0.014709569	1.832400052	-0.55353253
exosc3	periderm	ENSDART00000158353	ENSDARG00000098334	85.9516	89.4018	82.5805	85.97796667	41.9876	34.6817	34.7191	37.12946667	5.48E-27	2.42E-25	24.61618463	0.90729181
exosc4	periderm	ENSDART00000163310	ENSDARG00000103432	105.503	96.0286	106.848	102.7932	164.535	169.288	166.236	166.6863333	4.72E-14	8.20E-13	12.08618615	-0.430727568
ext1c	non_periderm	ENSDART00000138295	ENSDARG00000035649	4.68316	3.17604	4.45322	4.10414	1.90526	2.49006	0.930924	1.775414667	0.001772494	0.00678367	2.168535287	0.954452152
f2rl1.1	periderm	ENSDART00000099733	ENSDARG00000068856	0.632497	0.714402	1.19334	0.846746333	0.270847	0.691032	0.35497	0.438949667	0.024441022	0.064906315	1.187713047	0.758590728
f2rl1.2	periderm	ENSDART00000151543	ENSDARG00000077540	6.73497	7.07007	7.02469	6.943243333	9.84569	9.41421	9.84731	9.702403333	0.007591383	0.02412927	1.617455817	-0.259281992
f8	non_periderm	ENSDART00000172676	ENSDARG00000101385	0.115767	0.133425	0.230467	0.159886333	0.181311	0.0991857	0.0721287	0.1175418	0.245515448	0.399859274	0.398092827	0.41200683
fa2h	periderm	ENSDART00000165510	ENSDARG00000090063	4.76526	5.57522	4.65929	4.999923333	2.68295	4.81203	2.36115	3.285376667	0.016258258	0.046259914	1.334795179	0.52853461
fabp3	non_periderm	ENSDART00000033724	ENSDARG00000023290	673.856	649.692	559.623	627.7236667	614.803	555.567	569.8	580.0566667	0.160474028	0.292435545	0.533969841	0.130293833
fabp6	non_periderm	ENSDART00000065448	ENSDARG00000044566	5.17516	2.92001	6.30071	4.798626667	10.6191	8.65704	10.0053	9.76048	0.002406276	0.008897549	2.050729612	-0.724484257
fabp7a	non_periderm	ENSDART00000026180	ENSDARG00000007697	272.815	266.836	272.975	270.8753333	399.958	366.492	384.262	383.5706667	2.55E-11	3.44E-10	9.463441557	-0.299110199
faf2	periderm	ENSDART00000029797	ENSDARG00000052374	97.1854	97.2456	100.481	98.304	79.6612	81.166	82.9058	81.24433333	8.68E-10	9.79E-09	8.009217308	0.268307599
fam114a1	periderm	ENSDART00000082063	ENSDARG00000008287	29.4044	30.6298	29.8213	29.95183333	13.3609	15.1634	15.2834	14.60256667	6.69E-40	5.33E-38	37.27327279	0.800016119
fam129ba	periderm	ENSDART00000102197	ENSDARG00000062970	15.3842	16.017	19.797	17.06606667	11.1893	11.6708	11.0967	11.31893333	6.49E-20	1.88E-18	17.72584215	0.488979393
fam155b	non_periderm	ENSDART00000084464	ENSDARG00000060152	3.27652	3.8252	4.05204	3.71792	4.13155	4.78629	4.64981	4.52255	0.378967261	0.542587629	0.265530112	-0.126901645
fam160b2	non_periderm	ENSDART00000168567	ENSDARG00000060029	1.1649	1.31166	1.4707	1.315753333	0.428488	0.973964	0.221686	0.541379333	0.153316608	0.282618719	0.548799076	1.134609487
fam168a	non_periderm	ENSDART00000160228	ENSDARG00000098832	75.1697	68.9209	60.4528	68.18113333	101.108	100.194	104.167	101.823	0.000626903	0.002701836	2.568341016	-0.326718596
fam169aa	periderm	ENSDART00000097466	ENSDARG00000059719	0.803966	0.902362	0.765152	0.823826667	0.824565	0.829674	0.802553	0.818930667	0.738832147	0.836793258	0.077381828	0.080913911
fam20b	periderm	ENSDART00000013453	ENSDARG00000008573	21.1362	20.4999	24.4172	22.01776667	16.7363	15.4666	17.7873	16.6634	7.01E-09	7.03E-08	7.153044675	0.357304403
fam3c	periderm	ENSDART00000100867	ENSDARG00000056152	41.1351	43.7747	45.7076	43.53913333	24.3485	25.4783	25.0397	24.9555	1.87E-33	1.12E-31	30.95078198	0.63566623
fam46ba	non_periderm	ENSDART00000058424	ENSDARG00000039943	20.7746	20.6245	24.721	22.04003333	24.5312	27.4544	26.7844	26.25666667	0.057542473	0.130830782	0.883290063	-0.094145423
fam46c	periderm	ENSDART00000139174	ENSDARG00000010437	11.0673	12.3079	13.2882	12.22113333	8.54536	8.66077	7.51551	8.240546667	2.41E-08	2.26E-07	6.645891561	0.470841547
fam49ba	non_periderm	ENSDART00000039717	ENSDARG00000020929	23.377	22.8076	21.4338	22.53946667	20.9082	18.2051	18.2783	19.13053333	0.001912329	0.007264198	2.138812327	0.242807582
fam50a	periderm	ENSDART00000037501	ENSDARG00000024895	21.4343	19.6051	17.9919	19.6771	18.8533	18.9541	19.3752	19.06086667	0.199986224	0.344602962	0.462680994	0.104079674
fam73b	non_periderm	ENSDART00000122699	ENSDARG00000089357	1.95272	2.2389	2.33474	2.175453333	2.86723	1.9202	3.12643	2.637953333	0.570194753	0.708481056	0.149671758	-0.094666775
fam84a	periderm	ENSDART00000023006	ENSDARG00000018921	12.205	12.361	12.1102	12.2254	10.6833	12.7878	12.3813	11.9508	0.165221007	0.299142562	0.524121791	0.104331207
fam84b	periderm	ENSDART00000043039	ENSDARG00000032859	1.65321	2.31022	2.06524	2.009556667	1.75862	1.71353	1.64091	1.704353333	0.270935389	0.429034243	0.367508044	0.224972441
fam91a1	periderm	ENSDART00000019459	ENSDARG00000003320	4.16257	4.35409	4.32989	4.282183333	6.70429	7.30692	6.50417	6.83846	3.24E-07	2.60E-06	5.585026652	-0.382795598
fancc	non_periderm	ENSDART00000099027	ENSDARG00000055232	2.25357	2.7772	1.97608	2.335616667	2.52554	3.30525	3.72368	3.184823333	0.162256241	0.295050513	0.530103626	-0.226802539
fancl	non_periderm	ENSDART00000020946	ENSDARG00000007885	7.62009	6.14483	7.04202	6.935646667	9.99521	8.49907	8.1312	8.87516	0.095704044	0.196269072	0.707148131	-0.167582483
farsb	periderm	ENSDART00000015979	ENSDARG00000016864	85.0869	86.8705	93.9967	88.65136667	82.0128	88.1739	87.7074	85.9647	0.010404671	0.031566803	1.5007694	0.109698195
fbln2	periderm	ENSDART00000113707	ENSDARG00000015156	3.52426	4.20517	4.67262	4.134016667	2.76842	3.71027	3.02171	3.1668	9.17E-05	0.000476695	3.321759403	0.352484419
fbp1a	non_periderm	ENSDART00000003926	ENSDARG00000021366	2.71817	2.61381	2.08573	2.47257	1.72741	1.5556	2.54884	1.94395	0.110068365	0.219201131	0.659157209	0.331471491
fbxl22	non_periderm	ENSDART00000067114	ENSDARG00000096995	96.0735	95.201	97.8143	96.36293333	36.6873	34.6483	34.9759	35.43716667	7.85E-82	1.74E-79	78.75945075	1.07081585
fbxl4	non_periderm	ENSDART00000137936	ENSDARG00000026941	2.83267	2.87339	2.92295	2.876336667	3.62074	3.29982	3.41593	3.445496667	0.392914105	0.555498714	0.255316942	-0.096968779
fbxl5	periderm	ENSDART00000123100	ENSDARG00000043046	18.5981	18.1916	22.4023	19.73066667	25.43	27.0171	25.6393	26.0288	0.000104205	0.00053518	3.271500125	-0.197740037
fbxo16	non_periderm	ENSDART00000153098	ENSDARG00000033949	13.2044	12.7861	14.1492	13.3799	3.84099	3.55028	4.16386	3.85171	4.34E-31	2.32E-29	28.63451202	1.322470916
fbxo3	non_periderm	ENSDART00000139382	ENSDARG00000029242	3.46258	3.5205	3.8723	3.61846	4.65251	4.04436	4.7668	4.48789	0.198754123	0.343010993	0.464691961	-0.131221944
fbxo30a	non_periderm	ENSDART00000081447	ENSDARG00000058561	1.45802	1.50073	2.08086	1.67987	2.77935	1.8806	1.52478	2.061576667	0.598184097	0.731325209	0.135889456	-0.105229639
fbxo45	non_periderm	ENSDART00000125412	ENSDARG00000071492	21.1586	23.7486	22.5337	22.4803	22.4733	24.1762	21.8555	22.835	0.328224197	0.4900571	0.309753314	0.061809445
fbxo8	periderm	ENSDART00000015323	ENSDARG00000007477	7.72202	7.13255	10.5719	8.47549	6.51212	6.87764	5.84596	6.411906667	0.000766454	0.003234	2.490259984	0.343859772
fdx1b	periderm	ENSDART00000131223	ENSDARG00000038956	1.32272	1.2162	1.06146	1.200126667	0.347998	0.355565	0.643111	0.448891333	0.022159193	0.059790943	1.223364597	1.049990316
fen1	non_periderm	ENSDART00000024224	ENSDARG00000011404	473.756	489.921	452.233	471.97	500.014	495.489	504.399	499.9673333	0.769755155	0.858357984	0.066331549	0.015461368
fezf1	non_periderm	ENSDART00000010325	ENSDARG00000010270	3.78307	3.98	4.31595	4.02634	15.0564	15.1482	15.0807	15.0951	2.96E-45	2.74E-43	42.56224944	-1.242222559
fezf2	non_periderm	ENSDART00000103997	ENSDARG00000070677	12.0892	14.2606	16.865	14.40493333	28.0233	25.7207	28.3402	27.3614	4.34E-09	4.47E-08	7.349692477	-0.571541697
fgf17	non_periderm	ENSDART00000168359	ENSDARG00000102778	15.4289	13.6606	18.8738	15.98776667	8.97553	12.4806	13.5005	11.65221	0.028432639	0.0736119	1.133051973	0.360738092
fgf24	non_periderm	ENSDART00000054877	ENSDARG00000037677	2.49791	3.67048	3.52852	3.232303333	3.49564	3.46768	3.47831	3.480543333	0.945998681	0.968508279	0.013896662	-0.007510209
fgf7	periderm	ENSDART00000082498	ENSDARG00000059387	2.09484	2.2778	2.62623	2.332956667	2.91944	2.87581	2.65389	2.81638	0.315862429	0.477420008	0.321099384	-0.108651548
fgf8a	non_periderm	ENSDART00000025583	ENSDARG00000003399	14.7455	16.4036	15.3417	15.49693333	20.1198	23.7722	23.0369	22.30963333	4.72E-06	3.12E-05	4.505845406	-0.282454967
fgfr1a	non_periderm	ENSDART00000147742	ENSDARG00000011027	3.71618	3.95541	4.65972	4.110436667	5.78092	6.32657	5.81935	5.975613333	6.34E-06	4.12E-05	4.385102784	-0.291840946
fgfr1b	non_periderm	ENSDART00000075259	ENSDARG00000011190	83.6409	89.3712	109.044	94.0187	72.4098	74.4773	65.4378	70.77496667	2.14E-09	2.30E-08	7.638272164	0.361197659
fgfr4	non_periderm	ENSDART00000100286	ENSDARG00000069105	78.8975	88.2723	107.611	91.5936	89.8845	98.4648	90.5645	92.97126667	0.318381631	0.480302596	0.318485066	0.062576199
fgfrl1a	non_periderm	ENSDART00000082667	ENSDARG00000032617	64.9683	63.1712	66.2868	64.80876667	62.8887	69.7872	67.503	66.7263	0.186524974	0.327016937	0.485429754	0.054362183
fhdc1	non_periderm	ENSDART00000134470	ENSDARG00000074812	2.70515	2.70187	4.21391	3.206976667	4.90824	5.42286	4.38572	4.905606667	0.005781835	0.019014009	1.720926305	-0.358411156
fign	non_periderm	ENSDART00000023105	ENSDARG00000008662	8.64977	9.34794	10.6658	9.554503333	7.82517	8.88146	7.6246	8.11041	0.000766701	0.00323458	2.490182103	0.244495561
fkbp14	non_periderm	ENSDART00000059619	ENSDARG00000040695	36.6254	36.5975	35.7566	36.3265	12.4634	13.2195	12.5021	12.72833333	1.20E-62	1.79E-60	59.74714697	1.126316688
fkbp7	non_periderm	ENSDART00000136728	ENSDARG00000010962	119.572	109.515	99.1766	109.4212	50.8754	51.7694	49.0281	50.55763333	2.60E-23	9.38E-22	21.02779716	0.83071911
fkbp8	non_periderm	ENSDART00000002029	ENSDARG00000001734	19.6033	18.1502	21.5086	19.75403333	19.1613	18.5024	19.8339	19.16586667	0.08142431	0.172702949	0.762700247	0.107864195
fkrp	non_periderm	ENSDART00000161445	ENSDARG00000100467	4.08449	4.06876	6.07067	4.741306667	4.64275	7.27756	5.36008	5.76013	0.46535638	0.621177028	0.206784613	-0.114940466
flna	periderm	ENSDART00000135820	ENSDARG00000074201	9.14437	10.3512	12.5508	10.68212333	7.94817	9.55441	7.92604	8.476206667	5.61E-05	0.000304156	3.516903612	0.312961468
flncb	non_periderm	ENSDART00000026492	ENSDARG00000018820	11.3797	14.3331	19.8266	15.1798	7.88962	6.93308	6.72053	7.181076667	2.03E-08	1.91E-07	6.718966633	0.811265214
flot2a	periderm	ENSDART00000161586	ENSDARG00000004830	169.151	161.912	159.353	163.472	149.89	145.974	141.017	145.627	0.00014381	0.000717782	3.144007437	0.198005603
flt3	periderm	ENSDART00000081357	ENSDARG00000058503	0.0723957	0.130924	0.1481	0.1171399	0.0459118	0	0.0491286	0.031680133	0.047273084	0.111607602	0.952306223	1.729668943
fmnl2a	non_periderm	ENSDART00000167998	ENSDARG00000012586	2.14261	1.99047	2.20153	2.111536667	1.95089	1.57976	1.39129	1.640646667	0.001524639	0.005943672	2.225945165	0.345691436
fmnl2b	non_periderm	ENSDART00000112883	ENSDARG00000075041	6.01564	6.31453	7.66195	6.66404	11.5108	12.3471	12.3999	12.08593333	1.30E-17	3.10E-16	15.50863831	-0.515199218
fmr1	non_periderm	ENSDART00000123434	ENSDARG00000037433	6.28723	5.32189	6.96288	6.190666667	10.148	11.2387	11.1479	10.84486667	4.37E-12	6.37E-11	10.19586057	-0.480950602
fndc3ba	non_periderm	ENSDART00000161386	ENSDARG00000078179	13.0785	14.1179	19.6168	15.6044	14.4049	14.9591	14.029	14.46433333	0.125984236	0.243371338	0.61373057	0.14616883
fosl2	periderm	ENSDART00000128482	ENSDARG00000040623	84.7201	88.9715	104.157	92.6162	65.353	73.63	69.0057	69.32956667	1.06E-22	3.67E-21	20.43533394	0.372320576
foxa	non_periderm	ENSDART00000128515	ENSDARG00000087094	16.3176	15.6336	15.2821	15.74443333	7.12991	4.88959	6.50224	6.173913333	5.03E-14	8.73E-13	12.05898576	1.026095755
foxa1	non_periderm	ENSDART00000161844	ENSDARG00000102138	11.216	13.7794	13.2075	12.7343	10.6346	14.2809	12.807	12.57416667	0.299127196	0.459613337	0.337607378	0.09441269
foxa2	non_periderm	ENSDART00000014296	ENSDARG00000003411	23.8912	27.2143	25.3303	25.4786	24.3651	21.9034	22.4792	22.9159	0.003336929	0.011857385	1.926011079	0.183112203
foxc1a	non_periderm	ENSDART00000122732	ENSDARG00000091481	11.6852	12.0285	11.3196	11.67776667	12.4861	13.5726	14.0952	13.38463333	0.434530489	0.593711624	0.226424448	-0.055496943
foxc1b	non_periderm	ENSDART00000077753	ENSDARG00000055398	19.6669	18.8344	20.3686	19.6233	16.199	16.9739	15.8837	16.3522	7.92E-05	0.000416869	3.380000399	0.260888503
foxd2	non_periderm	ENSDART00000138176	ENSDARG00000058133	9.08155	10.2815	11.4337	10.26558333	8.15323	11.4619	9.89646	9.837196667	0.173492995	0.310207637	0.508347514	0.128090866
foxd3	non_periderm	ENSDART00000017695	ENSDARG00000021032	14.3348	17.2652	16.1248	15.90826667	13.5028	11.86	11.9989	12.4539	1.36E-05	8.35E-05	4.078313525	0.32116537
foxf1	periderm	ENSDART00000012374	ENSDARG00000015399	0.631384	0.55949	0.481765	0.557546333	0.912987	0.739089	1.16438	0.938818667	0.182626737	0.32177436	0.492448565	-0.428368322
foxg1a	non_periderm	ENSDART00000104204	ENSDARG00000070769	3.36328	4.01963	3.33833	3.573746667	15.6569	14.8243	13.8039	14.7617	1.27E-55	1.58E-53	52.80134291	-1.338870518
foxh1	periderm	ENSDART00000152370	ENSDARG00000055630	2.30366	2.16216	2.05937	2.175063333	1.98417	2.65746	2.37974	2.340456667	0.891925688	0.936119813	0.028668563	0.015715291
foxi2	non_periderm	ENSDART00000101673	ENSDARG00000069715	1.19836	0.874399	1.32105	1.131269667	2.22824	1.47466	2.30948	2.004126667	0.027093891	0.070686274	1.15066491	-0.489646486
foxj1a	non_periderm	ENSDART00000168280	ENSDARG00000101919	27.9518	24.5012	24.9899	25.8143	13.6288	11.8451	12.627	12.7003	5.52E-21	1.72E-19	18.76447155	0.792882862
foxl2	non_periderm	ENSDART00000061828	ENSDARG00000042180	2.40361	2.42631	3.3735	2.734473333	2.2199	2.68318	1.9033	2.268793333	0.218266616	0.36740928	0.434849879	0.248444628
foxn2b	non_periderm	ENSDART00000066317	ENSDARG00000045105	6.12795	6.35411	7.49804	6.660033333	12.1352	12.0609	10.372	11.5227	2.15E-07	1.78E-06	5.749579998	-0.471763541
foxn4	non_periderm	ENSDART00000008994	ENSDARG00000010591	1.08697	1.86549	1.35184	1.434766667	1.73092	0.814502	0.760031	1.101817667	0.293054754	0.45296293	0.343937339	0.392831085
foxo3a	non_periderm	ENSDART00000030773	ENSDARG00000023058	7.51917	7.5091	9.64958	8.22595	12.4487	13.1251	11.5387	12.37083333	1.48E-07	1.25E-06	5.903089987	-0.328338273
foxp1a	non_periderm	ENSDART00000129022	ENSDARG00000004843	53.4739	54.2919	60.7018	56.15586667	53.6979	58.9413	54.7039	55.78103333	0.039847473	0.097288372	1.011939064	0.088489392
foxp1b	non_periderm	ENSDART00000149301	ENSDARG00000014181	6.60612	9.11615	7.59721	7.77316	9.36598	20.9729	11.9448	14.09456	0.038639741	0.094778928	1.023288208	-0.51912586
foxp2	periderm	ENSDART00000134820	ENSDARG00000005453	4.16595	3.4781	4.24167	3.961906667	5.87931	6.30855	7.05477	6.41421	0.000722292	0.003065822	2.513453064	-0.401590506
foxq1a	periderm	ENSDART00000045770	ENSDARG00000030896	3.07E-06	1.06827	1.88561	0.98462769	0	0.804543	1.03075	0.611764333	0.874558432	0.926063508	0.033359229	0.332012091
fras1	non_periderm	ENSDART00000160236	ENSDARG00000054619	2.22566	2.3566	3.00976	2.530673333	3.04184	3.34158	2.97566	3.119693333	0.051196688	0.119023275	0.924368104	-0.129625368
frem2b	non_periderm	ENSDART00000164670	ENSDARG00000102626	0.481368	0.472161	0.773474	0.575667667	0.506539	0.448897	0.323506	0.426314	0.046225202	0.109657067	0.959963374	0.376007604
frem3	non_periderm	ENSDART00000140889	ENSDARG00000074677	6.33491	8.41867	4.10383	6.285803333	3.95432	4.63337	6.67015	5.085946667	0.406740183	0.567431793	0.246086334	0.234613011
frs2a	periderm	ENSDART00000168370	ENSDARG00000045873	3.50114	4.15214	5.84059	4.497956667	10.8678	13.5132	7.22943	10.53681	0.000319207	0.001474206	2.831441826	-0.761465028
fscn2a	periderm	ENSDART00000082937	ENSDARG00000059574	1.54128	1.36979	1.03057	1.31388	0.530358	0.256467	0.179478	0.322101	2.51E-05	0.000146426	3.834381801	1.533530411
fstl1a	non_periderm	ENSDART00000015046	ENSDARG00000015559	76.7246	76.7497	73.0392	75.5045	94.0198	84.6849	84.0703	87.59166667	0.25793338	0.414546598	0.382426645	-0.072275736
fstl1b	non_periderm	ENSDART00000121456	ENSDARG00000039576	94.4062	99.0594	107.734	100.3998667	71.6906	77.9128	74.6184	74.7406	2.10E-23	7.59E-22	21.11975822	0.378957841
ftr14l	periderm	ENSDART00000136024	ENSDARG00000078254	8.15971	7.97981	7.43776	7.859093333	0.327214	0.490495	0.44201	0.419906333	1.38E-38	1.05E-36	35.9788107	2.978452915
ftr53	non_periderm	ENSDART00000130995	ENSDARG00000041220	1.46909	1.89428	1.75918	1.707516667	1.55019	1.01792	1.28322	1.283776667	0.026609063	0.069579409	1.157519264	0.371826722
ftr82	periderm	ENSDART00000016758	ENSDARG00000055647	48.6469	47.0243	47.5689	47.7467	41.0852	44.3766	46.5287	43.99683333	0.001004698	0.004103604	2.386834556	0.163171914
ftr83	periderm	ENSDART00000138292	ENSDARG00000025403	9.30869	11.69	12.3314	11.11003	3.96976	6.56377	7.62029	6.051273333	0.000909745	0.00375627	2.425243198	0.68814703
fuca2	periderm	ENSDART00000064700	ENSDARG00000044073	5.856	5.98763	6.98565	6.276426667	3.35498	5.2163	5.73591	4.769063333	0.019485132	0.053753545	1.269592889	0.375654902
furina	periderm	ENSDART00000091470	ENSDARG00000062909	4.64351	4.85717	5.50111	5.000596667	5.50437	5.48773	6.27352	5.755206667	0.365921043	0.52948977	0.276142426	-0.055187622
fxn	periderm	ENSDART00000142577	ENSDARG00000074356	3.28315	3.55544	3.12934	3.322643333	4.7368	5.92066	5.2287	5.295386667	8.29E-05	0.000434322	3.362188171	-0.380777168
fynrk	periderm	ENSDART00000032212	ENSDARG00000027807	3.91367	4.96885	4.41815	4.433556667	2.19334	1.84352	1.71082	1.915893333	1.88E-18	4.81E-17	16.31785492	0.922478256
fzd2	non_periderm	ENSDART00000076636	ENSDARG00000054438	55.4465	55.2832	62.0013	57.577	56.1477	62.883	59.6511	59.5606	0.289995553	0.449992228	0.346794987	0.046729239
fzd3a	non_periderm	ENSDART00000090549	ENSDARG00000021664	5.11867	5.2623	6.07982	5.48693	7.95197	9.17247	7.21142	8.111953333	1.04E-06	7.73E-06	5.111820506	-0.303026675
fzd3b	periderm	ENSDART00000154713	ENSDARG00000058692	4.09662	3.33273	3.2314	3.553583333	2.6058	2.90629	3.03353	2.84854	0.260239012	0.416991302	0.379873004	0.269781114
fzd4	non_periderm	ENSDART00000159503	ENSDARG00000104117	14.3559	17.6722	17.4937	16.50726667	22.24	20.3554	18.7962	20.46386667	0.067737911	0.149339595	0.825825031	-0.136521204
fzd5	non_periderm	ENSDART00000031761	ENSDARG00000025420	4.87423	4.24286	5.21749	4.778193333	12.6028	11.1124	11.108	11.60773333	3.04E-19	8.28E-18	17.08196966	-0.809906157
fzd7b	non_periderm	ENSDART00000039280	ENSDARG00000027589	87.1694	80.5704	91.88	86.53993333	84.0172	95.1324	88.2859	89.14516667	0.191354587	0.33340768	0.4770244	0.052354363
fzd9b	non_periderm	ENSDART00000159107	ENSDARG00000014673	17.2859	17.1621	20.7585	18.40216667	23.9427	21.2765	22.8124	22.6772	0.068558299	0.150764528	0.821700828	-0.132574307
g2e3	non_periderm	ENSDART00000001444	ENSDARG00000001313	42.471	40.6559	45.389	42.83863333	48.5972	50.9281	49.8746	49.79996667	0.116704669	0.229339294	0.639521529	-0.068217495
g3bp1	non_periderm	ENSDART00000018651	ENSDARG00000017741	180.939	198.395	224.741	201.3583333	268.968	279.073	283.692	277.2443333	4.35E-10	5.10E-09	8.292429824	-0.249123382
gab1	periderm	ENSDART00000140724	ENSDARG00000037018	24.9607	30.0784	36.8273	30.62213333	30.7938	32.9941	29.4714	31.08643333	0.502423528	0.651719483	0.185939296	0.057957656
gabarapl2	periderm	ENSDART00000039485	ENSDARG00000027200	55.472	57.328	52.9877	55.26256667	54.3282	55.6318	61.2845	57.0815	0.582113602	0.71847744	0.143586864	0.035808503
gadd45aa	non_periderm	ENSDART00000063996	ENSDARG00000043581	18.5392	22.1554	19.5068	20.06713333	5.91622	5.45432	7.9914	6.45398	1.34E-18	3.48E-17	16.45842076	1.215039909
gadd45ab	periderm	ENSDART00000162993	ENSDARG00000104571	76.7843	75.2619	77.3568	76.46766667	47.8168	49.385	46.4494	47.88373333	2.76E-22	9.31E-21	20.03105032	0.538385753
gale	periderm	ENSDART00000135569	ENSDARG00000002401	39.4233	37.9098	40.7268	39.3533	19.0951	17.2602	17.4021	17.91913333	3.03E-40	2.46E-38	37.60906489	0.862284009
galns	periderm	ENSDART00000149478	ENSDARG00000051853	2.74258	1.44673	1.66369	1.951	1.06424	1.39403	2.07646	1.511576667	0.246255887	0.400660849	0.397223093	0.331579221
galnt1	periderm	ENSDART00000140673	ENSDARG00000061335	19.4397	18.4053	21.3695	19.73816667	18.0092	18.5369	16.5925	17.71286667	0.000231128	0.001101421	2.958046647	0.191717455
galnt7	periderm	ENSDART00000079928	ENSDARG00000057303	21.9983	21.7465	22.1035	21.94943333	15.8033	17.1314	15.8489	16.2612	3.70E-12	5.43E-11	10.26520017	0.383287997
gapdhs	periderm	ENSDART00000058384	ENSDARG00000039914	84.6538	80.1497	82.5865	82.46333333	38.9299	36.9392	42.3353	39.40146667	1.30E-39	1.02E-37	36.99139983	0.814154783
gart	non_periderm	ENSDART00000170884	ENSDARG00000101089	49.6109	49.4633	52.4227	50.49896667	77.5781	73.1276	73.2646	74.65676667	2.60E-08	2.43E-07	6.614393726	-0.309434214
gas1b	non_periderm	ENSDART00000098045	ENSDARG00000067984	43.4831	45.1914	45.8693	44.84793333	60.184	65.4596	62.1283	62.59063333	7.76E-09	7.77E-08	7.109578981	-0.250375072
gata5	periderm	ENSDART00000012194	ENSDARG00000017821	3.32572	4.45428	3.11764	3.632546667	7.36471	6.79325	6.38694	6.8483	2.41E-05	0.000140828	3.851310988	-0.563422565
gatad1	non_periderm	ENSDART00000051712	ENSDARG00000027612	24.8169	20.0778	24.3928	23.09583333	28.6415	34.041	34.7572	32.4799	0.002415943	0.008927734	2.049258758	-0.268955288
gatm	periderm	ENSDART00000052641	ENSDARG00000036239	25.052	26.3324	27.6595	26.34796667	21.3176	22.5668	19.4452	21.10986667	1.64E-06	1.17E-05	4.931814138	0.301488825
gbgt1l4	periderm	ENSDART00000133805	ENSDARG00000068503	6.17118	4.78519	5.04009	5.332153333	1.73225	0.782215	2.22632	1.580261667	5.18E-05	0.000282586	3.548849358	1.348314253
gbp	periderm	ENSDART00000058587	ENSDARG00000040059	84.2959	78.6986	73.2318	78.7421	88.3085	77.5126	82.9051	82.90873333	0.802345624	0.8798572	0.055587808	0.021378903
gbx1	non_periderm	ENSDART00000105572	ENSDARG00000071418	10.0647	10.545	10.3121	10.30726667	14.4027	14.3856	16.1872	14.99183333	0.000121869	0.000616477	3.210083122	-0.29512415
gbx2	non_periderm	ENSDART00000015333	ENSDARG00000002933	3.81898	5.23796	4.07206	4.376333333	4.41542	4.26124	5.10524	4.593966667	0.839355643	0.903410197	0.044115012	0.024554824
gcat	non_periderm	ENSDART00000007398	ENSDARG00000005643	17.6367	20.931	19.7789	19.44886667	22.5941	21.396	19.7908	21.2603	0.847837213	0.908420701	0.041712978	-0.0129138
gck	periderm	ENSDART00000129772	ENSDARG00000068006	2.87323	2.76227	2.98111	2.872203333	2.29082	1.51649	1.5932	1.80017	7.33E-05	0.000388019	3.411147008	0.561927913
gclc	periderm	ENSDART00000017148	ENSDARG00000013095	49.3313	50.862	53.3632	51.1855	53.0046	61.7377	58.6829	57.8084	0.380281056	0.543878271	0.264498292	-0.037598323
gcnt4a	periderm	ENSDART00000050988	ENSDARG00000035198	8.20949	8.83982	7.30386	8.117723333	3.55004	3.5058	3.74381	3.599883333	2.29E-16	4.93E-15	14.30715308	0.886629185
gdf11	non_periderm	ENSDART00000066033	ENSDARG00000044924	5.36791	6.51977	6.46587	6.11785	7.40588	7.3983	7.81645	7.54021	0.206765648	0.353056111	0.452156267	-0.135230193
gdf5	periderm	ENSDART00000149343	ENSDARG00000002760	0.422519	0.577114	0.487735	0.495789333	0.415545	0.866485	0.674505	0.652178333	0.603688188	0.735735143	0.133278499	-0.15779367
gdf6a	non_periderm	ENSDART00000075517	ENSDARG00000053479	18.4366	20.3906	18.9222	19.2498	14.9277	17.2046	16.2614	16.13123333	1.18E-05	7.28E-05	4.137868621	0.259067565
gdf6b	non_periderm	ENSDART00000151090	ENSDARG00000005510	13.4374	10.5249	17.7657	13.90933333	15.3085	12.2623	10.8201	12.79696667	0.381985327	0.545661038	0.263077055	0.146977564
gdpd4a	non_periderm	ENSDART00000161520	ENSDARG00000102447	2.52453	3.31913	3.49146	3.111706667	1.76424	1.63419	1.53597	1.6448	4.67E-06	3.10E-05	4.508638306	0.703924683
gfap	non_periderm	ENSDART00000028270	ENSDARG00000025301	28.0721	27.0682	30.8698	28.67003333	38.3705	36.457	38.8148	37.88076667	5.84E-05	0.000315632	3.500818973	-0.198090545
gfpt2	periderm	ENSDART00000076974	ENSDARG00000044094	3.5233	4.69176	4.79016	4.335073333	2.38251	2.2038	1.99342	2.193243333	7.91E-10	8.97E-09	8.047207557	0.752563375
gga1	periderm	ENSDART00000038818	ENSDARG00000038537	43.4772	40.3465	44.9288	42.9175	51.9521	60.3475	56.5533	56.2843	1.43E-05	8.69E-05	4.060980224	-0.187313217
ggctb	periderm	ENSDART00000014098	ENSDARG00000005085	30.6455	33.3679	36.7823	33.59856667	22.104	19.4092	17.9236	19.81226667	3.04E-11	4.09E-10	9.388276692	0.586732016
ghrh	periderm	ENSDART00000101175	ENSDARG00000069481	2.87219	2.38599	2.61509	2.624423333	1.04689	0.831967	0.442477	0.773778	9.26E-06	5.84E-05	4.233587153	1.320599126
ghsrb	non_periderm	ENSDART00000079721	ENSDARG00000057117	0.752069	1.39783	1.23287	1.127589667	1.22909	0.975255	0.918669	1.041004667	0.700481167	0.809919978	0.091557888	0.120467353
gins1	non_periderm	ENSDART00000022051	ENSDARG00000007624	40.5318	43.6942	36.403	40.20966667	46.7405	47.1694	43.9494	45.9531	0.413689522	0.573978699	0.241104224	-0.065830644
gipc1	periderm	ENSDART00000167173	ENSDARG00000104483	6.33769	7.92135	11.8119	8.690313333	18.9009	22.6486	19.1012	20.2169	4.89E-07	3.82E-06	5.417936637	-0.801501164
git2a	periderm	ENSDART00000170344	ENSDARG00000061915	6.5387	5.55052	6.86168	6.316966667	4.47414	4.97855	4.57508	4.675923333	1.53E-07	1.29E-06	5.88941029	0.382573878
gja3	periderm	ENSDART00000145627	ENSDARG00000021889	0.205849	0.306531	0.0694461	0.193942033	0	0.225367	0.152069	0.125812	0.380070688	0.543664738	0.264668834	0.891477669
gla	periderm	ENSDART00000139293	ENSDARG00000036155	1.64237	2.01259	1.68532	1.780093333	1.80606	1.54532	2.35084	1.90074	0.914448688	0.950618755	0.021993622	0.020072781
glb1l	periderm	ENSDART00000047191	ENSDARG00000029955	6.96169	6.29214	6.95085	6.734893333	8.47699	9.51007	10.6373	9.541453333	0.001857797	0.007081981	2.149845243	-0.265359436
glcci1	periderm	ENSDART00000036854	ENSDARG00000008503	4.05441	3.43098	3.67253	3.719306667	3.45707	3.7339	3.48218	3.557716667	0.221628452	0.371487924	0.430055299	0.124345428
glceb	non_periderm	ENSDART00000099988	ENSDARG00000068981	9.67503	10.8239	13.6842	11.39437667	12.6492	15.2491	14.6969	14.1984	0.096341006	0.197336701	0.704792136	-0.142459838
gli1	non_periderm	ENSDART00000170685	ENSDARG00000101244	5.29763	6.78797	9.01	7.031866667	10.32	10.9183	9.20971	10.14933667	0.021705736	0.058822364	1.230457526	-0.301849492
gli2b	non_periderm	ENSDART00000017912	ENSDARG00000020884	21.0538	24.116	28.4275	24.53243333	39.0284	40.1768	37.5132	38.90613333	1.67E-10	2.06E-09	8.68613278	-0.38250804
gli3	non_periderm	ENSDART00000058992	ENSDARG00000052131	6.5878	6.76442	8.24936	7.200526667	7.88174	8.9729	8.26389	8.372843333	0.220404162	0.369923321	0.431888289	-0.068688073
glis3	non_periderm	ENSDART00000164871	ENSDARG00000069726	0.325535	0.35298	0.300801	0.326438667	0.337275	0.20071	0.322145	0.28671	0.395418806	0.557913686	0.253432985	0.233461352
glra4a	periderm	ENSDART00000030509	ENSDARG00000006865	0.405942	0.528702	0.498231	0.477625	0.312859	0.301885	0.284662	0.299802	0.115695285	0.227833471	0.642382473	0.530347801
glud1a	periderm	ENSDART00000016946	ENSDARG00000008816	6.19894	7.18906	7.72738	7.03846	10.7054	11.0796	10.6954	10.8268	8.81E-06	5.57E-05	4.254144805	-0.353270062
glula	periderm	ENSDART00000170216	ENSDARG00000099776	44.2953	44.2791	49.0378	45.87073333	117.995	120.801	121.823	120.2063333	5.50E-88	1.35E-85	84.86966623	-0.885460385
glulb	non_periderm	ENSDART00000170402	ENSDARG00000100003	594.301	593.267	626.269	604.6123333	678.001	681.202	685.504	681.569	0.292295542	0.452319976	0.344554232	-0.040383589
glyr1	periderm	ENSDART00000167741	ENSDARG00000099213	69.6648	69.2616	72.0521	70.32616667	82.7518	92.6934	84.8032	86.74946667	0.001720191	0.006609598	2.179824954	-0.126112619
gmds	periderm	ENSDART00000046764	ENSDARG00000026629	51.9084	53.5967	54.1479	53.21766667	28.9701	28.1558	30.3345	29.15346667	4.30E-34	2.66E-32	31.57511836	0.678882718
gmnn	periderm	ENSDART00000052185	ENSDARG00000035957	92.6753	100.519	87.9699	93.7214	106.296	99.4008	106.424	104.0402667	0.574012756	0.711782161	0.147652901	-0.039581338
gmppb	periderm	ENSDART00000002826	ENSDARG00000017658	52.6934	53.5856	53.3791	53.21936667	42.3106	44.2149	41.7874	42.77096667	4.84E-09	4.96E-08	7.304518324	0.297049034
gna13b	periderm	ENSDART00000028883	ENSDARG00000037924	12.6802	15.8563	19.8748	16.1371	15.9381	21.2337	16.1222	17.76466667	0.828855822	0.896223612	0.047583618	-0.027958916
gna14	periderm	ENSDART00000148436	ENSDARG00000035178	3.9158	4.36529	3.57972	3.953603333	0.0963033	0.438653	0.188339	0.241098433	3.55E-13	5.73E-12	11.24184538	3.014771273
gna14a	periderm	ENSDART00000036178	ENSDARG00000025013	0.0328169	0.32524	0.147549	0.1685353	0.0378403	0.221687	0.320345	0.193290767	0.923783147	0.955885793	0.019593993	-0.094979012
gnaia	non_periderm	ENSDART00000138985	ENSDARG00000044760	58.1167	55.2877	61.2686	58.22433333	10.438	9.606	9.23534	9.75978	3.09E-56	3.96E-54	53.40230481	1.869864579
gnao1a	non_periderm	ENSDART00000149685	ENSDARG00000016676	15.468	15.4018	15.4371	15.43563333	12.3571	14.0308	12.6525	13.01346667	0.000192624	0.000934888	3.029240415	0.252947769
gnas	periderm	ENSDART00000121809	ENSDARG00000043094	7.40347	7.7409	8.11838	7.75425	8.53625	8.12816	7.84945	8.171286667	0.735090472	0.83400301	0.078832382	0.027746455
gnb1a	periderm	ENSDART00000130104	ENSDARG00000090454	205.055	217.758	218.222	213.6783333	218.523	225.416	233.031	225.6566667	0.538286832	0.682819359	0.165694174	0.023612996
gnb1b	non_periderm	ENSDART00000172465	ENSDARG00000104372	133.281	125	119.715	125.9986667	149.908	152.13	156.036	152.6913333	0.082873267	0.175046429	0.756846745	-0.109032843
gne	non_periderm	ENSDART00000158595	ENSDARG00000099771	10.6582	9.59849	9.80786	10.02151667	6.27891	5.71748	5.23507	5.74382	1.94E-15	3.85E-14	13.41453927	0.641644638
gnl1	periderm	ENSDART00000088513	ENSDARG00000061789	23.4128	21.2776	22.2781	22.32283333	30.5376	29.8864	28.5038	29.6426	0.000495208	0.00218855	2.659843527	-0.204568399
gnl3	periderm	ENSDART00000122953	ENSDARG00000006219	250.756	247.472	234.167	244.1316667	264.933	262.71	266.121	264.588	0.979619196	0.988434915	0.005051922	-0.001370875
gnpda2	non_periderm	ENSDART00000136665	ENSDARG00000024443	3.09694	3.19608	4.78589	3.69297	4.36798	4.9159	4.61302	4.6323	0.395153105	0.557683128	0.253612494	-0.192959652
golga1	non_periderm	ENSDART00000098578	ENSDARG00000008979	6.92086	7.01506	8.60426	7.513393333	7.79008	8.08741	7.90486	7.92745	0.694804388	0.805669246	0.093843214	0.025699
golga2	periderm	ENSDART00000163173	ENSDARG00000063197	12.0321	12.673	13.2012	12.63543333	8.80282	9.30547	9.45612	9.188136667	4.69E-13	7.48E-12	11.1260984	0.403717234
golga4	non_periderm	ENSDART00000109469	ENSDARG00000075331	3.42626	3.68436	4.23742	3.78268	3.21978	3.55698	3.01463	3.263796667	0.000660718	0.002831467	2.547988496	0.231997795
gorab	periderm	ENSDART00000143765	ENSDARG00000042031	23.72	22.2183	23.8499	23.26273333	19.7927	19.6176	20.1665	19.85893333	9.67E-05	0.000499914	3.301104701	0.237213436
gosr1	periderm	ENSDART00000100746	ENSDARG00000026654	36.1166	35.9855	37.7235	36.60853333	30.0791	21.9803	24.6202	25.55986667	2.07E-05	0.000122413	3.912172459	0.439825479
got1	periderm	ENSDART00000167859	ENSDARG00000039093	24.7828	24.9995	27.6354	25.8059	19.9931	23.1396	20.6779	21.2702	7.00E-08	6.17E-07	6.209714836	0.276866899
gpat2	periderm	ENSDART00000141349	ENSDARG00000053575	0.81683	0.640048	0.793768	0.750215333	0.618916	0.282962	0.507247	0.469708333	0.022606272	0.060772595	1.216292219	0.589982205
gpatch8	periderm	ENSDART00000151369	ENSDARG00000059768	28.1221	22.1173	17.6136	22.61766667	13.943	21.1054	18.6818	17.91006667	0.219893452	0.36937951	0.432527199	0.244259368
gpc3	non_periderm	ENSDART00000173108	ENSDARG00000032199	0.0659227	0.155957	0.0494603	0.090446667	0.21861	0.289355	0.329685	0.279216667	0.068150193	0.150025633	0.823834532	-1.100086732
gpd1a	non_periderm	ENSDART00000064172	ENSDARG00000043701	11.2918	9.35794	9.14321	9.930983333	12.2584	13.1987	10.6065	12.0212	0.272987264	0.43128621	0.365234428	-0.11733446
gpd2	non_periderm	ENSDART00000140453	ENSDARG00000062430	3.03875	2.67189	2.81578	2.84214	1.68073	2.08232	1.62215	1.795066667	0.000550501	0.002406636	2.618589591	0.538549575
gpm6aa	non_periderm	ENSDART00000058503	ENSDARG00000055455	0.954986	1.33974	0.904674	1.066466667	1.98647	1.84897	1.41703	1.750823333	0.014599526	0.042175277	1.374942056	-0.415346684
gpm6bb	non_periderm	ENSDART00000085693	ENSDARG00000001676	5.68758	5.87442	7.22135	6.261116667	14.8664	15.0195	16.6343	15.50673333	2.17E-20	6.48E-19	18.18842499	-0.833827124
gpr143	non_periderm	ENSDART00000139555	ENSDARG00000034572	4.04781	5.65199	2.03163	3.910476667	2.16931	3.02901	1.92078	2.373033333	0.174300171	0.311323989	0.506787414	0.469844354
gpr146	non_periderm	ENSDART00000131652	ENSDARG00000059610	2.75428	3.3139	3.88175	3.316643333	4.29406	5.26464	4.0562	4.5383	0.034486072	0.086268475	1.064147879	-0.233026512
gpr160	periderm	ENSDART00000056519	ENSDARG00000038700	2.33937	2.17368	3.14086	2.551303333	1.199	1.53693	1.22931	1.321746667	0.002212774	0.008279186	2.08201236	0.71053578
gpr161	non_periderm	ENSDART00000078051	ENSDARG00000055659	20.645	20.9913	19.0888	20.2417	23.0282	22.1105	19.8483	21.66233333	0.849115571	0.909352652	0.041267662	0.01393481
gpsm2	periderm	ENSDART00000024034	ENSDARG00000017311	7.26685	5.59507	7.17648	6.679466667	5.83515	5.04029	4.49693	5.124123333	0.002913074	0.010523474	1.977840868	0.34567746
gpt2	periderm	ENSDART00000165789	ENSDARG00000012199	5.59026	6.52946	6.60851	6.242743333	9.78287	9.33917	10.8438	9.988613333	7.41E-07	5.63E-06	5.249491605	-0.38823863
grapa	periderm	ENSDART00000055171	ENSDARG00000005414	5.27029	4.80964	5.38766	5.155863333	4.20826	5.14955	4.66151	4.673106667	0.152957149	0.282124538	0.549559139	0.174072344
grapb	periderm	ENSDART00000081093	ENSDARG00000022668	0.299043	0.255693	0.152785	0.235840333	0.178083	0.169489	0.257317	0.201629667	0.66293497	0.78235817	0.106594378	0.214517512
grb10a	non_periderm	ENSDART00000140665	ENSDARG00000002013	21.284	23.3064	27.0937	23.8947	27.9323	25.901	25.5634	26.46556667	0.662928717	0.78235817	0.106594378	-0.024384842
grhl1	periderm	ENSDART00000149715	ENSDARG00000061391	7.66502	8.49532	7.20861	7.78965	2.89026	4.97898	2.10435	3.32453	0.000147952	0.000736183	3.133014216	0.940068927
grhl2a	periderm	ENSDART00000148528	ENSDARG00000058342	6.21486	5.55504	6.60733	6.125743333	3.7379	3.80048	3.11331	3.550563333	6.52E-10	7.48E-09	8.126098402	0.625750805
grhl3	periderm	ENSDART00000114215	ENSDARG00000078552	6.34605	6.85552	5.99249	6.39802	5.92623	5.61837	4.97236	5.505653333	0.006759453	0.021792292	1.661697091	0.232789814
gria2a	non_periderm	ENSDART00000102782	ENSDARG00000070173	0.405909	0.224184	0.234625	0.288239333	0.163249	0.210018	0.394506	0.255924333	0.492807308	0.644202306	0.190977725	0.230552189
grid2	non_periderm	ENSDART00000141634	ENSDARG00000055302	0.126906	0.106555	0.0300602	0.0878404	0.217433	0.111324	0.178425	0.169060667	0.2889494	0.448817861	0.347929868	-0.667272285
grid2ipa	periderm	ENSDART00000142478	ENSDARG00000076103	0.229024	0.161381	0.27994	0.223448333	0.266918	0.107629	0.166182	0.180243	0.273580514	0.431996606	0.364519665	0.339241625
grifin	non_periderm	ENSDART00000049687	ENSDARG00000033382	1.6199	3.15195	2.47259	2.414813333	3.5005	3.07883	2.86831	3.149213333	0.404538081	0.565640722	0.247459332	-0.249711783
grik1a	periderm	ENSDART00000147089	ENSDARG00000069139	1.28035	0.656633	0	0.645661	0	0.671819	0.157219	0.276346	0.74012498	0.837390123	0.077072166	0.762986111
grik4	non_periderm	ENSDART00000156760	ENSDARG00000026753	0.362481	0.347977	0.291386	0.333948	0.0482655	0.217325	0.0129485	0.092846333	0.012905577	0.037970373	1.420555137	1.853649867
grin2db	non_periderm	ENSDART00000144062	ENSDARG00000070620	0.885909	0.641281	0.789704	0.772298	0.199568	0.248396	0.335408	0.261124	9.07E-06	5.72E-05	4.242603971	1.168200749
grk4	non_periderm	ENSDART00000066638	ENSDARG00000070448	18.1789	19.6716	22.4133	20.08793333	25.0639	28.8639	25.7302	26.55266667	0.000374004	0.001704947	2.768289117	-0.199385175
grk5	periderm	ENSDART00000122847	ENSDARG00000032801	6.01119	6.33652	3.92409	5.423933333	4.69836	5.39268	4.27434	4.78846	0.495196742	0.646347543	0.189533898	0.14720566
grnb	periderm	ENSDART00000105686	ENSDARG00000025081	17.8182	18.4831	19.5764	18.6259	15.0482	16.6893	16.9481	16.22853333	0.000128712	0.000647873	3.188510119	0.220555313
grpel2	periderm	ENSDART00000101036	ENSDARG00000069421	288.44	295.691	323.283	302.4713333	252.255	275.116	281.336	269.569	4.14E-05	0.000230819	3.636728445	0.174944312
gsdf	periderm	ENSDART00000110196	ENSDARG00000075301	0.164313	0.0873506	0.263939	0.171867533	0.542921	0.60849	0.259555	0.470322	0.151883257	0.28067285	0.551799595	-0.912067662
gsg1l	non_periderm	ENSDART00000054408	ENSDARG00000037390	0.622735	0.520995	0.257327	0.467019	0.191717	0.613841	0.188872	0.331476667	0.279661049	0.438563027	0.357967984	0.508148626
gsk3b	non_periderm	ENSDART00000018228	ENSDARG00000017803	36.6965	38.6701	45.8898	40.4188	47.9388	55.4197	50.1495	51.16933333	0.000924704	0.00381185	2.418864198	-0.154111975
gsnb	periderm	ENSDART00000047110	ENSDARG00000045262	16.58	18.2038	17.3761	17.38663333	18.3965	16.025	16.5526	16.99136667	0.102187629	0.20675563	0.684542656	0.105116219
gsx1	periderm	ENSDART00000051833	ENSDARG00000035735	3.07313	3.12783	5.18574	3.795566667	7.53517	9.39823	8.62258	8.51866	5.93E-07	4.58E-06	5.339134522	-0.759783715
gsx2	non_periderm	ENSDART00000063601	ENSDARG00000043322	4.3492	4.20194	5.77135	4.774163333	13.853	11.0531	14.3026	13.06956667	2.45E-15	4.81E-14	13.31785492	-0.937448428
gtdc1	non_periderm	ENSDART00000024572	ENSDARG00000020642	8.81041	8.86895	10.0896	9.25632	13.7848	13.1007	14.1218	13.6691	0.000422571	0.001900314	2.721174632	-0.315308871
gtf2a1	non_periderm	ENSDART00000159053	ENSDARG00000011000	54.1431	56.7075	61.1376	57.3294	56.2982	64.5117	62.543	61.11763333	0.803125691	0.880340905	0.055349118	0.012864033
gtf2f2b	periderm	ENSDART00000006514	ENSDARG00000006816	2.14638	1.45401	1.43244	1.67761	0.502607	1.31302	1.06341	0.959679	0.03410342	0.085503449	1.068016367	0.670837366
gtf2h2	periderm	ENSDART00000007587	ENSDARG00000016514	19.7696	21.0914	19.6669	20.17596667	21.8985	23.1566	23.2518	22.76896667	0.500295236	0.650166549	0.186975379	-0.042652726
gtf3ab	non_periderm	ENSDART00000105925	ENSDARG00000071583	0.621338	0.736859	0.789671	0.715956	0.530516	0.660971	1.05933	0.750272333	0.870242613	0.923516912	0.034555147	0.059442453
gtf3c4	non_periderm	ENSDART00000101295	ENSDARG00000069538	7.94344	9.32168	9.39774	8.88762	9.40726	11.3514	11.1457	10.63478667	0.179797067	0.318379651	0.497054698	-0.097517871
gtpbp1	periderm	ENSDART00000146005	ENSDARG00000053467	38.6305	37.1498	40.5254	38.76856667	41.5121	46.9968	45.7153	44.7414	0.19095434	0.332904136	0.477680809	-0.059568661
gucy2f	periderm	ENSDART00000099916	ENSDARG00000025504	1.47554	1.71538	2.0761	1.755673333	1.95151	2.21148	1.80966	1.990883333	0.618082421	0.747356756	0.126472035	-0.046489589
guf1	periderm	ENSDART00000042672	ENSDARG00000029088	10.6925	9.80152	10.5613	10.35177333	13.1938	13.0497	13.9769	13.4068	0.007922032	0.025034999	1.601452422	-0.177002876
gxylt1b	periderm	ENSDART00000032805	ENSDARG00000022550	13.3175	14.3333	15.3498	14.33353333	14.8929	16.3105	14.5157	15.2397	0.821562899	0.892172113	0.049551356	0.016224229
gxylt2	non_periderm	ENSDART00000064878	ENSDARG00000044191	6.90859	6.92269	7.28471	7.038663333	6.20079	7.21614	6.31841	6.578446667	0.090919651	0.188487054	0.724718473	0.149352899
gyg2	periderm	ENSDART00000041191	ENSDARG00000033380	1.57594	1.45878	0.868593	1.301104333	0.891774	0.61682	0.51962	0.676071333	0.007663092	0.024331136	1.613837614	0.716072401
gyltl1b	non_periderm	ENSDART00000172328	ENSDARG00000017058	4.09106	4.73441	5.05394	4.62647	5.21533	5.1036	4.70061	5.006513333	0.992047625	0.995710381	0.001866965	0.000877128
h2afy	periderm	ENSDART00000162548	ENSDARG00000099329	1.36862	1.19475	1.25617	1.27318	1.37385	1.02585	1.12016	1.173286667	0.251560209	0.406911436	0.390500104	0.169634216
h2afy2	non_periderm	ENSDART00000161779	ENSDARG00000087897	64.1836	60.5156	61.2889	61.99603333	160.389	164.606	166.266	163.7536667	5.00E-90	1.27E-87	86.89619628	-0.893619561
hadh	non_periderm	ENSDART00000050603	ENSDARG00000030765	34.5828	36.3399	35.4453	35.456	36.8749	36.9396	39.3418	37.71876667	0.834588699	0.900375302	0.045576427	0.012462742
hadhaa	periderm	ENSDART00000079734	ENSDARG00000057128	20.8787	20.3265	23.1754	21.4602	9.44898	10.2095	9.21373	9.62407	5.22E-44	4.70E-42	41.32790214	0.882915043
hand2	non_periderm	ENSDART00000020409	ENSDARG00000008305	24.4047	24.5576	20.7318	23.23136667	14.6049	14.3883	14.1988	14.39733333	1.35E-10	1.69E-09	8.772113295	0.551669082
hapln1a	non_periderm	ENSDART00000122966	ENSDARG00000089769	49.4263	46.509	58.4034	51.44623333	37.486	44.8904	36.5197	39.63203333	2.62E-07	2.14E-06	5.669586227	0.345374777
hapln1b	periderm	ENSDART00000062631	ENSDARG00000068516	6.43245	7.85962	8.54068	7.610916667	7.84443	9.0399	8.34852	8.41095	0.753931936	0.847266373	0.07198003	-0.020351105
has2	non_periderm	ENSDART00000053754	ENSDARG00000036987	9.0874	9.67788	11.9788	10.24802667	15.8818	19.6109	16.985	17.49256667	1.85E-10	2.27E-09	8.643974143	-0.453122512
hbegfa	periderm	ENSDART00000109138	ENSDARG00000075121	16.3918	17.645	18.1362	17.391	13.62	12.631	13.2982	13.18306667	1.60E-06	1.15E-05	4.93930216	0.35421363
hcfc1a	periderm	ENSDART00000014945	ENSDARG00000015990	47.7462	55.1365	76.4199	59.76753333	100.441	113.795	97.7625	103.9995	2.08E-05	0.000123	3.910094889	-0.485572732
hck	periderm	ENSDART00000135787	ENSDARG00000058647	2.64565	2.73606	2.93636	2.77269	2.87694	2.87577	2.6741	2.808936667	0.34529855	0.508888097	0.293377707	0.072625883
hcn4l	periderm	ENSDART00000088249	ENSDARG00000074419	0.197792	0.131196	0.15532	0.161436	0.277826	0.203323	0.316287	0.265812	0.082247319	0.174044301	0.759340193	-0.406136344
hdac4	periderm	ENSDART00000165238	ENSDARG00000098349	4.93381	5.69215	7.58115	6.069036667	5.80974	6.11072	5.79405	5.904836667	0.326307333	0.487865014	0.311700325	0.094986421
hdac9b	periderm	ENSDART00000079159	ENSDARG00000056642	2.424	3.20831	3.16944	2.933916667	1.62348	1.63708	1.52395	1.594836667	0.003924589	0.01364468	1.865036645	0.680036
hddc2	non_periderm	ENSDART00000050729	ENSDARG00000034957	96.3795	92.2176	94.037	94.21136667	106.237	100.824	98.3048	101.7886	0.723620262	0.826468447	0.082773722	-0.019827917
hdr	periderm	ENSDART00000005025	ENSDARG00000004392	28.5232	33.4751	33.8913	31.9632	8.62081	9.29258	10.2633	9.39223	3.97E-69	7.00E-67	66.15490196	1.299914075
he1a	periderm	ENSDART00000115383	ENSDARG00000023656	1816.72	1826.52	1669.78	1771.006667	181.889	166.84	161.024	169.9176667	8.88E-257	8.32E-254	253.0798767	2.411059762
heatr3	periderm	ENSDART00000052368	ENSDARG00000036076	52.9244	52.6871	58.9859	54.8658	53.5338	58.9562	55.3981	55.9627	0.18061373	0.319539777	0.495475072	0.060353412
hecw2a	periderm	ENSDART00000137756	ENSDARG00000062447	0.231004	0.257775	0.5265	0.338426333	0.199755	0.148204	0.272793	0.206917333	0.070763611	0.154555887	0.810914448	0.528847099
hells	periderm	ENSDART00000080465	ENSDARG00000057738	69.5408	68.5826	72.7648	70.29606667	94.0177	98.9484	101.184	98.05003333	2.91E-10	3.49E-09	8.457174573	-0.249529545
helt	non_periderm	ENSDART00000078889	ENSDARG00000056400	3.33289	3.97684	3.91998	3.743236667	5.45746	5.94469	4.71157	5.37124	0.069825733	0.15286442	0.815693587	-0.295377529
helz	non_periderm	ENSDART00000044096	ENSDARG00000030560	26.3362	32.025	40.8761	33.0791	46.8908	52.7078	47.6499	49.08283333	0.001235193	0.004920876	2.307957579	-0.323980331
hemk1	periderm	ENSDART00000113157	ENSDARG00000078894	10.3298	9.71368	9.78019	9.941223333	10.1722	10.1045	9.58695	9.95455	0.351224492	0.515148543	0.288067524	0.076408972
her12	non_periderm	ENSDART00000044080	ENSDARG00000032963	197.346	195.275	150.357	180.9926667	184.005	138.417	155.856	159.426	0.197406091	0.341263385	0.466910306	0.19253069
her13	non_periderm	ENSDART00000109394	ENSDARG00000007097	16.8227	19.4283	20.6841	18.97836667	32.1091	36.3701	32.2175	33.56556667	2.50E-14	4.47E-13	12.34969248	-0.496630336
her2	non_periderm	ENSDART00000055709	ENSDARG00000038205	492.612	496.061	452.305	480.326	682.564	648.894	656.817	662.7583333	1.43E-05	8.70E-05	4.060480747	-0.269679087
her3	non_periderm	ENSDART00000113803	ENSDARG00000076857	19.6868	22.0106	22.1128	21.27006667	43.7041	39.1043	44.6334	42.4806	5.10E-15	9.74E-14	13.01144104	-0.630380357
her4.1	non_periderm	ENSDART00000079274	ENSDARG00000056732	114.531	108.129	126.839	116.4996667	174.725	204.137	204.346	194.4026667	1.12E-15	2.28E-14	13.64206515	-0.44817585
her4.2	non_periderm	ENSDART00000137573	ENSDARG00000094426	190.523	187.808	179.772	186.0343333	305.813	330.072	324.112	319.999	5.83E-21	1.81E-19	18.74232143	-0.465201433
her4.3	non_periderm	ENSDART00000104209	ENSDARG00000070770	8.80054	8.5048	9.4853	8.930213333	53.036	52.4621	57.8631	54.45373333	1.71E-117	5.97E-115	114.2240257	-1.729489711
her4.4	non_periderm	ENSDART00000079265	ENSDARG00000009822	75.1303	78.4606	78.1372	77.2427	161.504	170.082	165.709	165.765	5.45E-56	6.86E-54	53.16367588	-0.686758192
her5	non_periderm	ENSDART00000145336	ENSDARG00000008796	1.26613	1.24451	1.42364	1.311426667	1.8784	1.33574	1.14432	1.45282	0.96666826	0.980393681	0.008599497	-0.009717081
her8.2	non_periderm	ENSDART00000101578	ENSDARG00000069675	2.49636	2.63256	2.73006	2.61966	3.88873	4.1891	2.83833	3.63872	0.166605451	0.301052761	0.521357385	-0.247669117
her8a	non_periderm	ENSDART00000019035	ENSDARG00000016363	32.5236	37.3658	40.3817	36.75703333	63.2225	65.2833	64.4927	64.33283333	2.40E-19	6.57E-18	17.18243463	-0.483242109
hes6	non_periderm	ENSDART00000023040	ENSDARG00000019335	82.6811	85.8042	91.4709	86.65206667	113.555	119.476	118.044	117.025	1.47E-06	1.06E-05	4.974694135	-0.229489484
hesx1	non_periderm	ENSDART00000076711	ENSDARG00000054509	12.0608	9.21983	5.80927	9.029966667	41.5912	34.9038	41.2493	39.2481	1.17E-09	1.30E-08	7.886056648	-1.484035052
hexb	non_periderm	ENSDART00000050271	ENSDARG00000034368	45.3687	43.9867	49.3379	46.2311	48.5816	54.8837	56.2164	53.22723333	0.213986156	0.362293191	0.440939828	-0.06090621
hexim1	periderm	ENSDART00000053003	ENSDARG00000036482	216.814	214.969	229.01	220.2643333	193.79	220.017	210.566	208.1243333	0.000704797	0.002999787	2.522909581	0.133207366
hey1	non_periderm	ENSDART00000103640	ENSDARG00000070538	34.4727	42.0559	41.8468	39.45846667	57.8275	55.5771	53.9064	55.77033333	3.30E-06	2.25E-05	4.647817482	-0.266610849
hfe2	non_periderm	ENSDART00000045600	ENSDARG00000030494	68.8814	72.4684	74.9576	72.10246667	13.2711	14.9712	14.1828	14.1417	1.26E-189	8.14E-187	186.0893756	1.706854409
hfm1	non_periderm	ENSDART00000162295	ENSDARG00000104288	7.77538	5.73503	9.12353	7.544646667	6.61781	5.21938	8.27373	6.70364	0.573308504	0.711156285	0.148034947	0.1388068
hgfb	non_periderm	ENSDART00000113699	ENSDARG00000079076	3.88133	3.16171	4.33224	3.79176	2.83676	0.694889	1.96844	1.833363	0.033683177	0.084628567	1.072483013	0.892980634
hgs	periderm	ENSDART00000056622	ENSDARG00000020960	27.3413	29.2733	34.9081	30.50756667	35.3532	38.1769	33.4353	35.65513333	0.143921949	0.269485696	0.569464282	-0.0773257
hhatlb	periderm	ENSDART00000131677	ENSDARG00000005139	0.683386	0.430211	0.708928	0.607508333	1.93852	1.69712	2.01718	1.884273333	1.50E-10	1.87E-09	8.728158393	-1.065412652
hhip	non_periderm	ENSDART00000085051	ENSDARG00000060397	9.90077	10.8866	13.984	11.59045667	12.2546	13.1107	12.2044	12.52323333	0.967083082	0.980491465	0.008556182	-0.003046943
hhipl1	non_periderm	ENSDART00000090447	ENSDARG00000062501	2.49621	2.75836	2.3537	2.53609	1.78069	2.23559	1.86527	1.960516667	0.00325472	0.011605796	1.935325067	0.341876101
hiat1a	periderm	ENSDART00000012191	ENSDARG00000013117	14.3569	14.3687	17.6127	15.4461	11.9458	12.8318	12.0727	12.28343333	1.83E-07	1.53E-06	5.815308569	0.30794366
hibadha	non_periderm	ENSDART00000160134	ENSDARG00000102906	5.18056	6.79274	5.83633	5.936543333	12.1129	8.62617	10.509	10.41602333	0.000404058	0.001827909	2.738045429	-0.481831503
hif1ab	non_periderm	ENSDART00000018500	ENSDARG00000034293	128.215	135.173	160.558	141.3153333	154.603	162.277	158.939	158.6063333	0.359681458	0.523713144	0.280906526	-0.035620356
hif1al	periderm	ENSDART00000167005	ENSDARG00000100826	161.277	168.422	179.365	169.688	207.987	232.415	227.326	222.576	4.63E-07	3.63E-06	5.440093375	-0.188232855
hif1an	non_periderm	ENSDART00000042049	ENSDARG00000031915	33.9686	35.8948	39.9499	36.60443333	36.3429	37.033	40.2462	37.87403333	0.387996009	0.551161098	0.258721443	0.04445546
higd2a	periderm	ENSDART00000074216	ENSDARG00000052371	46.401	43.7085	42.9786	44.3627	34.8066	29.6973	38.2611	34.255	0.001092228	0.004421051	2.354474475	0.316410266
hinfp	periderm	ENSDART00000051414	ENSDARG00000004851	0.767078	1.5373	1.12152	1.141966	1.20648	0.693869	1.20341	1.034586333	0.532069289	0.677660009	0.168988143	0.172879694
hipk2	periderm	ENSDART00000062343	ENSDARG00000042518	2.56641	3.80599	4.33319	3.56853	4.04421	4.2697	3.79646	4.03679	0.649133543	0.771773903	0.112509911	-0.061462282
hirip3	periderm	ENSDART00000037906	ENSDARG00000027749	34.9237	38.0991	33.7531	35.59196667	42.5418	43.2963	41.7643	42.53413333	0.082618733	0.174664192	0.757796121	-0.100624929
hivep1	non_periderm	ENSDART00000166107	ENSDARG00000103658	10.364	13.1891	13.1258	12.2263	9.13274	11.8051	9.08731	10.00838333	0.024158077	0.064273748	1.191966374	0.262309331
hk1	periderm	ENSDART00000057638	ENSDARG00000039452	78.6944	81.7096	95.4043	85.26943333	87.7181	95.7347	90.8383	91.43036667	0.764080684	0.854304145	0.068387486	0.011502826
hlcs	periderm	ENSDART00000058411	ENSDARG00000039934	22.5902	28.3512	34.6304	28.52393333	34.1974	36.1452	35.7191	35.3539	0.112029816	0.222248765	0.653160644	-0.152946201
hlfa	periderm	ENSDART00000127157	ENSDARG00000074752	0.821228	0.860724	0.678996	0.786982667	0.976791	1.19149	0.699922	0.956067667	0.607913848	0.739033023	0.131336155	-0.094025473
hlfb	non_periderm	ENSDART00000153167	ENSDARG00000061011	2.89729	2.70206	3.63961	3.079653333	5.34314	6.30075	6.52379	6.055893333	8.58E-05	0.000448601	3.348139763	-0.611712116
hmbox1b	non_periderm	ENSDART00000008808	ENSDARG00000018913	2.85095	2.8887	4.36421	3.367953333	12.3473	12.7183	12.3764	12.48066667	4.85E-29	2.39E-27	26.6216021	-1.245174299
hmcn2	non_periderm	ENSDART00000137897	ENSDARG00000079327	3.32453	3.79644	3.77514	3.632036667	5.68478	6.14888	5.70037	5.844676667	3.09E-05	0.000176937	3.752181341	-0.393585938
hmga1a	periderm	ENSDART00000028885	ENSDARG00000028335	3539.51	3369.05	3398.34	3435.633333	4620.16	4794.86	4616.73	4677.25	7.48E-05	0.000395659	3.402678951	-0.227111717
hmga2	non_periderm	ENSDART00000080536	ENSDARG00000069912	54.0408	58.7489	65.2426	59.3441	53.5487	59.814	51.8187	55.06046667	0.004689318	0.015890761	1.798855304	0.147786168
hmgb1a	non_periderm	ENSDART00000165386	ENSDARG00000099175	127.337	131.651	128.599	129.1956667	208.302	208.486	204.416	207.068	2.05E-21	6.60E-20	19.18045606	-0.398476897
hmgcl	periderm	ENSDART00000027957	ENSDARG00000021220	40.496	36.3877	41.0184	39.3007	36.7382	38.663	37.8589	37.75336667	0.022122192	0.059713613	1.223926651	0.11802229
hmgcra	periderm	ENSDART00000097460	ENSDARG00000052734	2.00715	2.05942	1.71066	1.925743333	1.54482	1.75572	1.25356	1.518033333	0.016788979	0.047545853	1.322887357	0.327279481
hmgn3	periderm	ENSDART00000053367	ENSDARG00000036754	165.641	169.018	141.028	158.5623333	199.69	174.292	188.061	187.3476667	0.314084213	0.475540566	0.32281243	-0.09990708
hmx1	non_periderm	ENSDART00000113087	ENSDARG00000095651	3.10501	3.35109	3.31839	3.258163333	6.36488	6.55445	4.68234	5.867223333	4.59E-05	0.000253356	3.596268806	-0.500707721
hnf1a	non_periderm	ENSDART00000018862	ENSDARG00000009470	0.215904	0.426109	0.104185	0.248732667	0.503029	0.201306	0.379066	0.361133667	0.462381165	0.618546187	0.208627866	-0.369674879
hnf1ba	non_periderm	ENSDART00000144138	ENSDARG00000006615	6.18971	6.08176	6.41659	6.229353333	8.54437	8.64175	7.98641	8.390843333	0.001350542	0.005332094	2.273102203	-0.213152743
hnf4g	non_periderm	ENSDART00000066644	ENSDARG00000071565	1.3144	1.07417	1.10652	1.16503	1.23971	1.18075	0.285804	0.902088	0.284948647	0.444426542	0.352200012	0.507997655
hnrnpa3	periderm	ENSDART00000163482	ENSDARG00000059351	1.72503	1.70116	1.6367	1.68763	2.02518	1.82467	1.60592	1.81859	0.992617424	0.99600157	0.001739977	-0.00261901
hopx	periderm	ENSDART00000125203	ENSDARG00000089368	501.951	491.05	466.896	486.6323333	98.235	95.895	99.3174	97.8158	4.45E-200	3.17E-197	196.4989407	1.672923753
hoxa11a	non_periderm	ENSDART00000160283	ENSDARG00000104162	8.25299	7.69818	6.6603	7.537156667	17.8849	18.0171	21.1946	19.0322	8.93E-15	1.67E-13	12.77728353	-0.860809913
hoxa13b	non_periderm	ENSDART00000052662	ENSDARG00000036254	1.67123	1.3024	1.55165	1.508426667	3.80289	3.64787	2.37075	3.273836667	4.57E-05	0.000252127	3.598380644	-0.679540651
hoxa2b	non_periderm	ENSDART00000009827	ENSDARG00000023031	25.2683	25.6049	22.9072	24.59346667	22.8783	22.4336	25.091	23.46763333	0.104688381	0.210678267	0.676380263	0.125333815
hoxa3a	non_periderm	ENSDART00000169074	ENSDARG00000103862	20.6243	22.6027	20.617	21.28133333	27.9881	30.0992	27.842	28.6431	0.001266224	0.005031553	2.298297948	-0.224298646
hoxb10a	non_periderm	ENSDART00000111227	ENSDARG00000011579	40.148	36.1949	39.0367	38.45986667	53.6242	56.1241	53.6273	54.45853333	9.20E-07	6.88E-06	5.162411562	-0.27446637
hoxb1a	non_periderm	ENSDART00000110682	ENSDARG00000008174	19.0123	20.2272	18.8493	19.36293333	18.8462	16.9511	18.293	18.0301	0.043428387	0.104286697	0.981771087	0.146825449
hoxb1b	non_periderm	ENSDART00000136415	ENSDARG00000054033	36.1892	38.5167	38.1624	37.62276667	35.4918	37.1314	37.6715	36.7649	0.078225903	0.167414715	0.776206372	0.099132438
hoxb2a	non_periderm	ENSDART00000146636	ENSDARG00000000175	4.8954	4.64173	4.57378	4.703636667	6.21936	6.21824	6.8806	6.4394	0.025155525	0.066412525	1.177750008	-0.234983901
hoxb3a	non_periderm	ENSDART00000153512	ENSDARG00000029263	19.0628	22.0679	26.3481	22.49293333	26.919	29.0945	28.5962	28.20323333	0.018886536	0.052402595	1.280647206	-0.156901039
hoxb4a	non_periderm	ENSDART00000012470	ENSDARG00000013533	7.12233	7.61513	6.97361	7.237023333	11.3649	9.9498	11.2331	10.84926667	0.001665156	0.006425298	2.192106725	-0.332170668
hoxb5a	non_periderm	ENSDART00000025449	ENSDARG00000013057	10.1924	10.8963	11.8984	10.9957	12.5799	11.1588	11.1589	11.63253333	0.792845074	0.873980028	0.058498492	0.02098232
hoxb6a	non_periderm	ENSDART00000024256	ENSDARG00000010630	20.1428	16.2283	17.2973	17.88946667	21.0723	18.0836	19.4417	19.53253333	0.791696129	0.873290314	0.058841357	-0.025658591
hoxb6b	non_periderm	ENSDART00000025966	ENSDARG00000026513	11.0801	12.6716	14.1696	12.64043333	15.996	15.3512	15.6404	15.66253333	0.105415552	0.21182807	0.674016491	-0.148865481
hoxb8b	non_periderm	ENSDART00000076154	ENSDARG00000054025	14.0232	15.6455	15.0142	14.8943	20.1276	18.0664	17.4347	18.5429	0.088286011	0.184034268	0.735101302	-0.150435257
hoxb9a	non_periderm	ENSDART00000023674	ENSDARG00000056023	38.4117	38.9116	43.3665	40.22993333	39.6773	45.106	45.9139	43.56573333	0.960106373	0.976364492	0.010388023	0.002352096
hoxc10a	non_periderm	ENSDART00000053295	ENSDARG00000070348	5.51869	5.98582	6.04572	5.850076667	11.8517	10.9103	13.4138	12.0586	2.22E-10	2.69E-09	8.57024772	-0.643570409
hoxc11a	non_periderm	ENSDART00000103146	ENSDARG00000070351	2.32685	2.35558	1.7463	2.14291	3.93659	4.4741	4.25322	4.221303333	2.59E-06	1.80E-05	4.744727495	-0.603801028
hoxc11b	non_periderm	ENSDART00000164839	ENSDARG00000102631	4.46652	4.82456	4.44779	4.579623333	10.2063	11.0503	9.61905	10.29188333	1.81E-11	2.48E-10	9.605548319	-0.733644753
hoxc12a	non_periderm	ENSDART00000103147	ENSDARG00000070352	9.20671	8.34295	7.97685	8.508836667	35.989	32.3101	35.2155	34.50486667	2.28E-36	1.55E-34	33.8096683	-1.342276795
hoxc13a	non_periderm	ENSDART00000103149	ENSDARG00000070353	0.547481	0.785765	0.712659	0.681968333	0.798418	1.91558	1.37526	1.363086	0.082921025	0.175116144	0.756673814	-0.562672071
hoxc4a	non_periderm	ENSDART00000103132	ENSDARG00000070338	7.96289	6.32976	7.36259	7.218413333	9.55966	9.6679	10.0624	9.76332	0.034017301	0.085353634	1.068777984	-0.236263234
hoxc6b	non_periderm	ENSDART00000173139	ENSDARG00000101954	31.3692	29.6736	29.0921	30.04496667	28.0025	28.924	29.8843	28.93693333	0.187757327	0.328603005	0.483328469	0.106032339
hoxd11a	non_periderm	ENSDART00000082344	ENSDARG00000059267	18.2098	18.7227	16.0306	17.65436667	28.0836	30.4072	31.0973	29.8627	2.30E-08	2.16E-07	6.665546249	-0.452764037
hoxd3a	non_periderm	ENSDART00000138730	ENSDARG00000059280	10.6137	11.5834	14.1427	12.11326667	12.1903	11.0043	8.97954	10.72471333	0.454929295	0.61186563	0.213343942	0.141739224
hoxd4a	non_periderm	ENSDART00000082355	ENSDARG00000059276	10.6878	11.4677	11.2822	11.1459	16.4318	19.2219	18.2876	17.98043333	2.54E-09	2.71E-08	7.567030709	-0.395934728
hoxd9a	non_periderm	ENSDART00000082354	ENSDARG00000059274	27.3824	27.4678	27.2488	27.36633333	34.1027	32.5096	31.9713	32.8612	0.089433026	0.185957197	0.730587009	-0.10869706
hpx	periderm	ENSDART00000121506	ENSDARG00000012609	0.629458	0.300478	0.32697	0.418968667	0.160311	0.244868	0.248155	0.217778	0.050177662	0.117090667	0.93147772	0.684110699
hs3st1	periderm	ENSDART00000012098	ENSDARG00000012249	7.05627	6.3586	5.92838	6.44775	4.99098	7.81828	7.40293	6.737396667	0.839674694	0.903644351	0.044002462	0.031879658
hs3st3b1a	non_periderm	ENSDART00000159420	ENSDARG00000099149	4.35322	3.47932	4.72492	4.18582	3.32045	5.93792	3.62464	4.294336667	0.715828071	0.821000621	0.085656514	0.068032038
hs3st3b1b	non_periderm	ENSDART00000125900	ENSDARG00000086645	12.051	12.2731	13.9872	12.77043333	16.2604	19.6545	18.0375	17.98413333	3.12E-07	2.51E-06	5.600326279	-0.256363571
hs6st2	non_periderm	ENSDART00000002250	ENSDARG00000012025	90.2469	93.1022	100.827	94.72536667	106.677	113.579	109.104	109.7866667	0.09366544	0.193122606	0.714166887	-0.067207992
hsd11b2	non_periderm	ENSDART00000141211	ENSDARG00000001975	0.648831	0.319954	0.590889	0.519891333	0.466442	0.569965	0.523881	0.520096	0.876995278	0.92711285	0.032867399	0.039239637
hsd17b12a	periderm	ENSDART00000005299	ENSDARG00000015709	33.4147	34.4758	33.5742	33.82156667	17.7195	20.664	19.3696	19.25103333	1.18E-27	5.36E-26	25.27083521	0.644310205
hsd17b14	periderm	ENSDART00000077111	ENSDARG00000054842	18.6102	20.3662	19.1041	19.36016667	10.3746	11.603	10.8032	10.92693333	5.86E-22	1.95E-20	19.70996539	0.651917147
hsd17b2	periderm	ENSDART00000171369	ENSDARG00000045553	3.81547	4.07129	4.87121	4.252656667	6.05144	6.00578	5.70847	5.921896667	0.000566877	0.002470038	2.607296365	-0.251219313
hsdl2	periderm	ENSDART00000038888	ENSDARG00000002523	149.68	141.77	147.233	146.2276667	151.483	149.704	156.42	152.5356667	0.430450231	0.590151825	0.229036246	0.0328693
hsh2d	periderm	ENSDART00000062986	ENSDARG00000042908	4.11118	4.43357	5.3197	4.621483333	2.83906	2.68037	2.26479	2.59474	1.03E-08	1.01E-07	6.995678626	0.654317533
hsp70l	non_periderm	ENSDART00000031650	ENSDARG00000055723	2172.3	2155.4	2180.88	2169.526667	1687.12	1793.05	1788.92	1756.363333	2.26E-10	2.74E-09	8.562249437	0.292109903
hsp90ab1	periderm	ENSDART00000020084	ENSDARG00000029150	817.251	803.24	871.027	830.506	911.238	982.575	1004.69	966.1676667	0.114874128	0.226680194	0.644586424	-0.067809752
hspa12b	periderm	ENSDART00000087093	ENSDARG00000030307	1.99792	1.70581	2.4139	2.03921	1.77962	2.08529	2.27385	2.046253333	0.608038034	0.739101289	0.13129604	0.073558951
hspb1	periderm	ENSDART00000060162	ENSDARG00000041065	2053.35	2044.75	1943.57	2013.89	1640.42	1512.4	1617.51	1590.11	3.07E-07	2.48E-06	5.605548319	0.303118376
hspb9	non_periderm	ENSDART00000114023	ENSDARG00000078674	62.8594	63.72	63.4389	63.33943333	4.68116	5.3558	5.60352	5.213493333	2.22E-111	7.06E-109	108.1511953	2.549515669
hspg2	non_periderm	ENSDART00000157844	ENSDARG00000076564	4.30929	5.07166	6.17608	5.185676667	2.82282	3.53896	3.65198	3.33792	5.78E-07	4.47E-06	5.349692477	0.522703088
htatsf1	periderm	ENSDART00000079174	ENSDARG00000056649	60.2783	58.5338	57.132	58.64803333	65.8137	69.2692	67.1298	67.40423333	0.202463238	0.347503492	0.459040827	-0.062840291
huwe1	periderm	ENSDART00000146990	ENSDARG00000016782	5.77426	5.83314	8.0481	6.551833333	9.12926	10.0304	8.85643	9.338696667	0.000921753	0.003801443	2.420051517	-0.278106005
hyal3	periderm	ENSDART00000132787	ENSDARG00000036818	1.78949	1.08457	1.6971	1.52372	1.53049	1.88863	1.52297	1.647363333	0.927123596	0.957866479	0.018695025	-0.020259607
icn	periderm	ENSDART00000004679	ENSDARG00000009978	175.436	199.354	145.315	173.3683333	46.8354	30.1241	27.4007	34.78673333	1.31E-16	2.87E-15	14.5421181	1.636480892
id3	non_periderm	ENSDART00000077087	ENSDARG00000054823	113.14	119.744	130.918	121.2673333	135.613	137.259	128.276	133.716	0.522973882	0.669451685	0.174280761	-0.029436106
idh1	periderm	ENSDART00000007789	ENSDARG00000025375	27.5872	29.0886	28.1484	28.27473333	15.5907	16.8929	17.5524	16.67866667	6.55E-23	2.29E-21	20.64016452	0.607585837
ier5	non_periderm	ENSDART00000014330	ENSDARG00000009881	348.137	351.303	353.392	350.944	314.877	323.981	336.934	325.264	6.72E-05	0.00035908	3.444808783	0.151195823
ift172	non_periderm	ENSDART00000061334	ENSDARG00000041870	3.6361	3.68674	4.87659	4.066476667	7.34677	8.10446	7.84213	7.764453333	1.68E-16	3.65E-15	14.43770714	-0.569723466
igf1ra	non_periderm	ENSDART00000135649	ENSDARG00000027423	11.7543	10.1503	14.7533	12.2193	14.2202	16.1249	12.3919	14.24566667	0.446779102	0.604826197	0.218369406	-0.127428722
igf2a	periderm	ENSDART00000009642	ENSDARG00000018643	29.4114	28.9557	29.1627	29.1766	21.3241	24.6888	21.0906	22.36783333	1.72E-09	1.87E-08	7.728158393	0.34748352
igf2b	non_periderm	ENSDART00000047569	ENSDARG00000033307	87.5263	88.9937	92.2389	89.5863	88.369	89.082	87.0998	88.1836	0.011718363	0.034945098	1.456613737	0.098815283
igf2bp1	non_periderm	ENSDART00000155282	ENSDARG00000061478	134.231	147.574	109.941	130.582	139.916	120.527	113.309	124.584	0.4652572	0.621087057	0.206847521	0.094614168
igf2bp2b	periderm	ENSDART00000168189	ENSDARG00000099758	13.6946	13.8861	11.4941	13.02493333	17.4001	15.0269	19.3799	17.26896667	0.101400486	0.205560091	0.687061199	-0.202963039
igf2bp3	non_periderm	ENSDART00000010140	ENSDARG00000010266	68.6923	67.3466	69.7003	68.57973333	75.8461	74.1718	82.7656	77.5945	0.451798775	0.609449165	0.215062514	-0.037806903
ikzf5	non_periderm	ENSDART00000079011	ENSDARG00000056491	10.0067	10.4642	8.55192	9.674273333	9.25845	13.7496	10.0214	11.00981667	0.790711891	0.872682055	0.059143954	-0.036573858
il11a	periderm	ENSDART00000055160	ENSDARG00000037859	9.28579	9.29697	11.0259	9.869553333	13.3395	16.3612	12.6628	14.12116667	0.004444221	0.015185914	1.818559064	-0.286595717
il11b	periderm	ENSDART00000081440	ENSDARG00000058557	18.9651	27.4063	30.251	25.5408	18.8856	16.6189	18.4319	17.9788	0.006466407	0.020978564	1.678224243	0.364003007
il17rd	non_periderm	ENSDART00000172641	ENSDARG00000098359	23.4813	26.607	21.5724	23.8869	27.4512	27.9498	26.6274	27.3428	0.50057394	0.650386339	0.186828589	-0.056282776
il6r	periderm	ENSDART00000163338	ENSDARG00000104474	1.40576	1.4922	1.79803	1.56533	0.323795	0.174997	0.173237	0.224009667	5.49E-21	1.71E-19	18.76700389	2.050220993
ildr1a	periderm	ENSDART00000168428	ENSDARG00000103929	13.6568	12.723	15.5436	13.97446667	9.9329	10.6469	9.20395	9.927916667	9.16E-10	1.03E-08	7.987162775	0.421525531
ildr2	non_periderm	ENSDART00000049805	ENSDARG00000014180	53.1318	52.7047	57.5567	54.4644	69.2385	77.0267	75.0154	73.7602	1.73E-06	1.23E-05	4.910094889	-0.222347642
immp2l	periderm	ENSDART00000010706	ENSDARG00000004925	12.8736	11.4146	13.6707	12.65296667	19.9479	16.5706	18.6534	18.39063333	0.005107318	0.017093228	1.767175914	-0.317570227
ing2	non_periderm	ENSDART00000160066	ENSDARG00000104907	37.4291	40.4888	37.2783	38.39873333	33.5783	30.7002	33.1115	32.46333333	7.71E-05	0.000406852	3.390563545	0.243777863
ing5b	periderm	ENSDART00000098415	ENSDARG00000068175	68.3582	66.2495	60.4298	65.0125	70.4885	62.5854	69.1562	67.41003333	0.682754437	0.796979513	0.098552842	0.033698622
inhbaa	non_periderm	ENSDART00000004241	ENSDARG00000012671	1.92892	1.93734	2.52739	2.131216667	2.20808	2.47863	2.85349	2.5134	0.431210051	0.590693247	0.228637994	-0.083928946
inppl1b	non_periderm	ENSDART00000172791	ENSDARG00000001442	0.291814	0.106821	0.308872	0.235835667	0.300032	0.24017	0.214645	0.251615667	0.941562974	0.966120518	0.014968694	-0.070786029
insig1	non_periderm	ENSDART00000013785	ENSDARG00000010658	128.802	128.211	132.206	129.7396667	119.182	138.757	133.457	130.4653333	0.047712241	0.112425536	0.949135033	0.079520206
insl5a	non_periderm	ENSDART00000104628	ENSDARG00000070966	18.8974	19.1949	16.1862	18.09283333	15.4566	13.12	12.5652	13.71393333	0.003868929	0.013484079	1.870178712	0.32875076
insm1a	non_periderm	ENSDART00000124040	ENSDARG00000091756	4.5504	4.69191	4.76574	4.66935	4.32786	3.7675	3.29743	3.797596667	0.006352003	0.020659439	1.684881476	0.293074172
insra	periderm	ENSDART00000008302	ENSDARG00000011948	5.37571	6.06079	8.36333	6.599943333	7.72009	8.58738	8.44237	8.249946667	0.141286853	0.265655089	0.57568186	-0.154248673
ipmkb	periderm	ENSDART00000152450	ENSDARG00000029291	9.82037	11.0361	14.3166	11.72435667	17.3981	16.8979	15.7756	16.69053333	0.01492631	0.043009609	1.366434506	-0.319486108
ipo13	non_periderm	ENSDART00000085624	ENSDARG00000060618	14.3518	13.9767	20.0015	16.11	23.259	25.161	22.5049	23.64163333	0.000519075	0.002281292	2.641819122	-0.312873381
ippk	periderm	ENSDART00000131217	ENSDARG00000003446	6.15168	7.28157	8.52114	7.31813	8.19556	8.95212	9.51648	8.888053333	0.132069712	0.252226448	0.598209376	-0.120313401
iqca1	non_periderm	ENSDART00000128939	ENSDARG00000057276	4.60911	6.33543	4.49803	5.147523333	3.86785	2.66179	2.65969	3.06311	0.000965481	0.003963423	2.401929575	0.597430631
iqgap1	periderm	ENSDART00000110283	ENSDARG00000078888	9.27263	11.5581	14.9116	11.91411	6.95954	8.27918	6.96527	7.40133	2.62E-06	1.82E-05	4.739928612	0.545982466
irf2bp2b	periderm	ENSDART00000168531	ENSDARG00000098635	49.327	51.0993	51.5789	50.6684	46.5658	47.3942	50.3192	48.09306667	0.005878469	0.019283717	1.714809251	0.132163807
irf5	periderm	ENSDART00000067164	ENSDARG00000045681	3.53694	3.23197	4.78822	3.852376667	2.7425	3.43182	4.39331	3.522543333	0.378215609	0.54188181	0.266095427	0.168513965
irf8	periderm	ENSDART00000078894	ENSDARG00000056407	1.66935	1.99145	2.2089	1.956566667	2.6747	1.88981	1.77881	2.11444	0.949548152	0.970376885	0.013059557	0.009920904
irg1l	periderm	ENSDART00000091158	ENSDARG00000062788	13.5359	13.2296	14.3223	13.69593333	0.934301	0.650766	1.1341	0.906389	2.58E-58	3.53E-56	55.45222529	2.810215902
irx1b	non_periderm	ENSDART00000079114	ENSDARG00000056594	20.1667	20.5263	20.5364	20.4098	27.4291	26.4511	33.5346	29.13826667	0.001465694	0.005738379	2.241210772	-0.273041802
irx3b	non_periderm	ENSDART00000042271	ENSDARG00000031138	17.28	20.3057	23.0404	20.2087	31.4155	35.3596	36.6035	34.45953333	2.76E-10	3.32E-09	8.478861916	-0.467595274
irx4b	non_periderm	ENSDART00000133354	ENSDARG00000036051	0.482269	0.454815	0.447269	0.461451	1.1983	1.41427	1.35864	1.323736667	0.029602673	0.076198799	1.118051874	-0.961999023
irx5a	non_periderm	ENSDART00000043857	ENSDARG00000034043	5.55208	5.60011	5.60063	5.584273333	8.94256	8.63688	8.8457	8.80838	4.88E-05	0.00026745	3.572757398	-0.376566922
irx5b	non_periderm	ENSDART00000036147	ENSDARG00000074070	1.17862	1.21694	1.54952	1.315026667	2.14091	2.1397	2.15459	2.145066667	0.001590553	0.006168222	2.209840004	-0.412942275
irx6a	non_periderm	ENSDART00000045628	ENSDARG00000034420	0.617109	0.405061	0.497729	0.506633	0.64876	0.836494	0.418511	0.634588333	0.641945921	0.766169922	0.115674901	-0.118761911
isca1	periderm	ENSDART00000073676	ENSDARG00000051956	49.2461	50.9327	55.2663	51.81503333	57.2273	57.0969	59.2549	57.8597	0.431361312	0.590877723	0.228502383	-0.05092343
isl1	non_periderm	ENSDART00000010896	ENSDARG00000004023	17.3634	15.3522	17.1357	16.6171	9.75423	11.2481	9.68075	10.22769333	4.37E-16	9.16E-15	14.03810453	0.566409706
isl2a	periderm	ENSDART00000012862	ENSDARG00000003971	6.70962	8.38891	7.29011	7.46288	5.55695	5.86327	4.87112	5.430446667	6.35E-05	0.000341331	3.466824267	0.394341521
ism1	non_periderm	ENSDART00000025719	ENSDARG00000020541	14.7449	14.2935	15.2827	14.7737	18.2301	18.9196	20.2078	19.11916667	0.003340081	0.011866216	1.92568775	-0.17544042
itga11b	periderm	ENSDART00000153537	ENSDARG00000007950	0.10368	0.0288989	0.0910915	0.0745568	0.0674945	0.144966	0.100325	0.104261833	0.558721523	0.699349439	0.155305769	-0.321248684
itga3b	non_periderm	ENSDART00000105884	ENSDARG00000012824	2.29743	2.8201	2.9681	2.69521	2.81378	2.60554	3.00105	2.80679	0.704037642	0.81239675	0.090231823	0.038519657
itga6a	non_periderm	ENSDART00000114168	ENSDARG00000042282	42.4371	40.5952	42.1478	41.7267	30.5465	33.7653	31.8601	32.0573	3.04E-14	5.39E-13	12.26841123	0.34837815
itga8	periderm	ENSDART00000059038	ENSDARG00000078717	0.876271	0.859677	1.486	1.073982667	0.6905	0.79912	0.571356	0.686992	0.0035793	0.012594212	1.899829	0.50620448
itgb6	periderm	ENSDART00000065933	ENSDARG00000002494	5.13744	4.21122	5.14895	4.832536667	4.56391	3.83916	3.42547	3.942846667	0.008968721	0.027812094	1.555766311	0.288275794
itpka	periderm	ENSDART00000062900	ENSDARG00000042856	3.87086	3.99052	4.61833	4.159903333	4.13851	4.40461	3.77067	4.104596667	0.299840717	0.460334868	0.336926128	0.095015602
itpr2	periderm	ENSDART00000154505	ENSDARG00000011909	1.00007	1.38406	1.33188	1.23867	1.62389	1.66142	1.38722	1.55751	0.147697854	0.274951176	0.560744418	-0.150102016
ivd	periderm	ENSDART00000062894	ENSDARG00000042853	30.0211	30.5499	35.5321	32.03436667	38.7294	39.3915	40.7702	39.63036667	0.009372467	0.028888031	1.539282059	-0.135676439
ivns1abpa	periderm	ENSDART00000061659	ENSDARG00000031100	11.4147	10.616	12.7043	11.57833333	9.60297	9.86961	9.07289	9.515156667	1.71E-05	0.000102842	3.987829486	0.277119942
jag1a	non_periderm	ENSDART00000137172	ENSDARG00000030289	2.79817	3.4991	3.58002	3.29243	4.34496	4.98325	4.33086	4.553023333	0.001278083	0.005072451	2.29478214	-0.242041156
jagn1a	periderm	ENSDART00000060174	ENSDARG00000041071	17.5522	15.5094	18.8279	17.2965	9.0144	7.67818	9.18385	8.625476667	3.81E-16	8.02E-15	14.09582563	0.766081451
jam3b	non_periderm	ENSDART00000128297	ENSDARG00000061794	57.8285	64.9492	63.6847	62.15413333	56.4183	65.7522	54.9964	59.05563333	0.013626472	0.039779155	1.400344447	0.129416502
jarid2b	non_periderm	ENSDART00000089836	ENSDARG00000062268	23.6767	29.0687	36.1033	29.61623333	47.1992	48.3336	43.2545	46.26243333	0.000123862	0.000625533	3.203749774	-0.374903497
jkamp	non_periderm	ENSDART00000039438	ENSDARG00000028581	26.8423	25.6009	24.1651	25.5361	25.2279	26.9551	27.7924	26.65846667	0.592646221	0.726710762	0.138638408	0.035111847
junbb	non_periderm	ENSDART00000170917	ENSDARG00000104773	2225.09	2304.6	2308.66	2279.45	2008.39	2081.69	2140.83	2076.97	6.21E-05	0.000334519	3.47557921	0.167056624
kansl2	periderm	ENSDART00000078796	ENSDARG00000056318	81.9873	84.4784	87.6384	84.70136667	84.5301	82.785	91.8353	86.38346667	0.202567578	0.34760452	0.458914585	0.059210095
kat6a	non_periderm	ENSDART00000157675	ENSDARG00000018907	3.58348	3.41413	4.35383	3.783813333	6.1844	7.19398	6.46183	6.613403333	9.72E-17	2.15E-15	14.66756154	-0.475213423
kcnc1a	non_periderm	ENSDART00000163568	ENSDARG00000051852	0.303598	0.644595	0.158866	0.369019667	0.0764686	0.0630829	0	0.046517167	0.023436933	0.062632153	1.203202659	2.219077892
kcnip2	periderm	ENSDART00000110900	ENSDARG00000075846	0.352815	0.516499	0.504745	0.458019667	0.221894	0.737145	0.352358	0.437132333	0.704206184	0.812485927	0.090184153	0.208793396
kcnj11	periderm	ENSDART00000073588	ENSDARG00000051880	2.94063	4.0456	2.71074	3.232323333	1.96875	2.39228	3.63312	2.664716667	0.222568724	0.372625518	0.428727407	0.278553515
kcnn3	non_periderm	ENSDART00000131627	ENSDARG00000019753	1.86292	2.0287	1.70953	1.86705	2.9263	3.03729	2.92583	2.96314	0.000294829	0.001373734	2.862097353	-0.379644676
kctd15a	non_periderm	ENSDART00000142665	ENSDARG00000045893	14.0892	16.0797	16.7546	15.64116667	11.6142	10.4454	10.9789	11.01283333	1.49E-12	2.28E-11	10.64206515	0.431800339
kctd3	periderm	ENSDART00000086164	ENSDARG00000060854	5.18859	5.31266	5.57018	5.357143333	7.3298	7.20251	8.51336	7.68189	0.000234757	0.00111692	2.951977932	-0.274339729
kctd4	non_periderm	ENSDART00000099446	ENSDARG00000068691	2.95262	2.90318	3.51459	3.123463333	2.50893	2.99565	2.03227	2.512283333	0.041804568	0.101089445	0.995294188	0.300850187
kdm2bb	non_periderm	ENSDART00000102530	ENSDARG00000046010	4.79482	5.98134	5.86108	5.545746667	8.50006	8.59436	8.72113	8.605183333	7.96E-06	5.09E-05	4.293282218	-0.35921193
kdm5bb	non_periderm	ENSDART00000108508	ENSDARG00000003098	23.3891	27.3698	18.2956	23.01816667	34.4257	37.7849	35.571	35.9272	0.008723047	0.027170922	1.565895624	-0.37269805
kdm5c	periderm	ENSDART00000127053	ENSDARG00000006124	35.0941	40.4579	51.9068	42.48626667	53.6761	60.4486	58.1667	57.43046667	0.009490614	0.029181467	1.534892879	-0.227874094
kdm6a	periderm	ENSDART00000088469	ENSDARG00000061759	11.7185	12.1035	16.7651	13.52903333	16.2305	17.8624	17.0338	17.04223333	0.067445335	0.148832771	0.827301432	-0.158126576
kdm6bb	non_periderm	ENSDART00000136123	ENSDARG00000056929	5.32786	6.64164	6.97215	6.313883333	6.63104	7.84088	5.99056	6.820826667	0.929933555	0.959302835	0.018044272	0.007846033
kdrl	periderm	ENSDART00000170626	ENSDARG00000105215	4.47262	5.18204	6.45667	5.370443333	7.98036	9.62793	8.3533	8.653863333	4.55E-06	3.02E-05	4.519993057	-0.3997492
keap1a	non_periderm	ENSDART00000045763	ENSDARG00000016132	11.3066	10.3173	11.4523	11.0254	10.0375	11.7785	11.7301	11.18203333	0.292822351	0.452760922	0.344131064	0.069725865
keap1b	periderm	ENSDART00000148911	ENSDARG00000074634	19.0857	19.0155	25.0243	21.04183333	32.4164	32.5497	33.7177	32.8946	2.41E-08	2.27E-07	6.643974143	-0.372439302
khdrbs1a	periderm	ENSDART00000125633	ENSDARG00000052856	1134.79	1200	1234.36	1189.716667	2326.26	2423.86	2377.01	2375.71	7.13E-51	7.84E-49	48.10568394	-0.616557916
kidins220b	non_periderm	ENSDART00000101603	ENSDARG00000017338	5.27693	5.44175	7.825	6.181226667	10.5258	11.0755	10.3894	10.66356667	1.18E-06	8.65E-06	5.062983893	-0.47577821
kif13ba	periderm	ENSDART00000156832	ENSDARG00000079731	2.53473	2.59113	2.81841	2.64809	4.29816	4.27662	4.14908	4.241286667	7.51E-10	8.54E-09	8.068542129	-0.385113391
kif13bb	periderm	ENSDART00000058858	ENSDARG00000073859	0.560043	0.652398	0.674606	0.629015667	0.642761	0.635496	0.634738	0.637665	0.590784819	0.725332536	0.139462841	0.06909938
kif14	non_periderm	ENSDART00000089622	ENSDARG00000062187	8.83039	10.0535	12.5174	10.46709667	8.13428	8.35248	8.51828	8.335013333	5.03E-05	0.000275083	3.560536248	0.302537075
kif18a	non_periderm	ENSDART00000023568	ENSDARG00000008022	24.6186	23.7925	26.4253	24.94546667	25.5072	28.6886	29.8473	28.01436667	0.523157492	0.669614513	0.174175142	-0.032063771
kif19	periderm	ENSDART00000155367	ENSDARG00000053026	0.0583581	0.180936	0.112396	0.117230033	0	0	0.142121	0.047373667	0.073593123	0.159367484	0.797600284	2.418331652
kif1b	periderm	ENSDART00000146458	ENSDARG00000037020	2.10604	3.44978	3.0277	2.861173333	2.35785	4.0073	2.57253	2.979226667	0.799978436	0.878607003	0.056205339	0.050738765
kif21a	non_periderm	ENSDART00000149768	ENSDARG00000061131	1.6736	1.79684	2.06435	1.84493	3.19257	3.47503	2.79045	3.152683333	3.39E-09	3.56E-08	7.448550002	-0.448979646
kif23	periderm	ENSDART00000012241	ENSDARG00000014943	53.3987	57.6966	59.8737	56.98966667	49.6628	51.3659	50.6988	50.57583333	2.14E-06	1.50E-05	4.823908741	0.201240391
kif2c	periderm	ENSDART00000111430	ENSDARG00000076228	33.783	38.3668	35.8542	36.00133333	33.7291	37.1599	35.9385	35.60916667	0.097354684	0.199000975	0.701144796	0.091116875
kif5ba	periderm	ENSDART00000113849	ENSDARG00000074131	50.2974	50.8808	56.4479	52.54203333	48.9526	50.5116	52.4735	50.6459	0.003240343	0.011562636	1.936943146	0.120428896
kif5c	non_periderm	ENSDART00000083567	ENSDARG00000076027	1.8295	2.09151	2.78122	2.234076667	2.25537	3.24284	2.96057	2.819593333	0.254713661	0.410762256	0.38640947	-0.153389373
kif6	non_periderm	ENSDART00000103662	ENSDARG00000053240	1.7324	2.21064	1.82379	1.922276667	0.622034	0.809665	0.578892	0.670197	0.006292245	0.0204882	1.688496195	1.135360282
kirrela	non_periderm	ENSDART00000009695	ENSDARG00000001634	1.9622	1.62511	2.34774	1.97835	3.03957	2.67642	3.27098	2.995656667	0.003179794	0.011375353	1.944035117	-0.337371003
kirrelb	non_periderm	ENSDART00000146804	ENSDARG00000056998	3.48165	2.31646	3.64454	3.14755	2.27011	1.66525	2.66832	2.201226667	0.031417835	0.079963689	1.097107179	0.439811599
kita	non_periderm	ENSDART00000011135	ENSDARG00000043317	0.718133	1.12243	2.07825	1.306271	0.486471	0.494324	0.922088	0.634294333	0.031857559	0.080857486	1.092279766	0.75359245
kitlga	periderm	ENSDART00000113581	ENSDARG00000070917	8.0357	7.50953	7.73441	7.75988	6.5985	7.17055	3.92316	5.897403333	0.03958943	0.09675786	1.014313746	0.38286112
kitlgb	periderm	ENSDART00000080842	ENSDARG00000058042	1.9759	2.98065	2.83298	2.59651	1.69246	2.34633	2.01866	2.01915	0.024546192	0.065122476	1.186269096	0.321133613
kl	periderm	ENSDART00000114703	ENSDARG00000079862	0.212194	0.477457	0.557405	0.415685333	0.215609	0.206792	0.335904	0.252768333	0.402037657	0.563520488	0.24909029	0.516559057
klf12b	non_periderm	ENSDART00000146115	ENSDARG00000032197	2.37139	1.7161	2.04899	2.045493333	1.89347	1.72827	2.19288	1.938206667	0.413265514	0.573632876	0.241365966	0.127413026
klf2a	periderm	ENSDART00000062587	ENSDARG00000042667	8.4685	9.02386	10.7324	9.408253333	8.88371	7.51987	8.90593	8.436503333	0.023385834	0.062519053	1.203987609	0.186788307
klf3	periderm	ENSDART00000172141	ENSDARG00000015495	21.3445	19.9867	21.6432	20.99146667	11.3417	10.3941	12.5027	11.41283333	1.38E-21	4.47E-20	19.34969248	0.689485501
klf5a	periderm	ENSDART00000004361	ENSDARG00000015506	1.21217	1.17993	1.6388	1.343633333	0.669721	0.54142	0.522116	0.577752333	6.38E-12	9.15E-11	10.03857891	0.921197779
klf7a	non_periderm	ENSDART00000109356	ENSDARG00000073857	12.9028	12.2914	14.8343	13.34283333	11.5203	13.7649	11.4704	12.25186667	0.007278675	0.023255713	1.633470341	0.168116462
klf7b	non_periderm	ENSDART00000104317	ENSDARG00000043821	12.5573	13.9008	13.9047	13.45426667	13.0146	14.443	14.3716	13.94306667	0.314636489	0.476112631	0.322290297	0.049853056
klhl20	non_periderm	ENSDART00000056666	ENSDARG00000038801	12.8906	13.8962	17.2815	14.68943333	21.6358	22.6062	21.3021	21.84803333	1.64E-07	1.38E-06	5.860120914	-0.323441498
kpna1	periderm	ENSDART00000142080	ENSDARG00000016360	17.9553	18.9704	19.7836	18.9031	21.5785	20.617	22.2536	21.48303333	0.396758648	0.55899722	0.252590352	-0.045296816
kpna5	periderm	ENSDART00000102027	ENSDARG00000042030	28.5342	26.2622	32.6812	29.1592	36.9522	43.7196	38.1281	39.59996667	7.91E-05	0.000416193	3.380705229	-0.224302816
krt4	periderm	ENSDART00000012644	ENSDARG00000017624	2384.1	2315.48	2591.13	2430.236667	545.139	623.904	636.397	601.8133333	1.03E-229	8.54E-227	226.0685421	1.47804807
krt5	periderm	ENSDART00000129044	ENSDARG00000058371	531.992	512.97	512.201	519.0543333	27.225	30.5453	28.1172	28.62916667	9.99E-300	9.99E-300	299.0004345	2.979206428
krt8	periderm	ENSDART00000081215	ENSDARG00000058358	285.122	288.959	295.786	289.9556667	153.799	158.902	160.153	157.618	3.28E-74	6.53E-72	71.18508682	0.68966289
lace1b	non_periderm	ENSDART00000153411	ENSDARG00000042902	1.49269	1.36759	1.74707	1.535783333	1.34522	0.944914	0.940925	1.077019667	0.279250393	0.438052374	0.358473962	0.422891347
lama5	non_periderm	ENSDART00000045126	ENSDARG00000058543	10.0615	12.0096	16.2129	12.76133333	7.01798	7.56613	7.46293	7.349013333	2.22E-08	2.09E-07	6.679853714	0.619495543
lamc1	non_periderm	ENSDART00000004277	ENSDARG00000036279	38.8651	49.3869	69.1754	52.4758	58.7018	62.4369	53.6113	58.25	0.751864653	0.845904149	0.072678845	-0.045046232
lap3	periderm	ENSDART00000089025	ENSDARG00000061981	22.8872	23.4155	26.1194	24.1407	23.4003	24.2332	23.0711	23.5682	0.080421404	0.171092634	0.766768688	0.102000923
larp6	periderm	ENSDART00000158040	ENSDARG00000005355	18.4364	17.5929	17.2424	17.75723333	12.9159	14.5391	13.0154	13.49013333	4.33E-07	3.42E-06	5.465973894	0.355983415
lasp1	periderm	ENSDART00000051807	ENSDARG00000057867	67.671	64.839	70.1822	67.56406667	54.4072	53.7391	56.0772	54.74116667	1.74E-10	2.14E-09	8.669586227	0.290639816
lats2	periderm	ENSDART00000113352	ENSDARG00000078864	10.3677	11.7608	13.6745	11.93433333	11.4474	12.5417	8.54227	10.84379	0.115309534	0.227274912	0.643448502	0.18833999
layna	periderm	ENSDART00000050945	ENSDARG00000035169	0.786313	1.73615	1.22963	1.250697667	3.1523	2.62902	1.62527	2.468863333	0.033432001	0.084134012	1.075028401	-0.620104989
lbr	periderm	ENSDART00000019145	ENSDARG00000014013	139.098	137.986	155.801	144.295	148.62	158.074	158.54	155.078	0.801541459	0.879455724	0.05578602	0.009494172
lbx1a	periderm	ENSDART00000045351	ENSDARG00000018321	0.33569	0.208271	0.377494	0.307151667	0.752759	0.516607	1.13628	0.801882	0.03684298	0.091247806	1.039777569	-0.842005122
lbx1b	non_periderm	ENSDART00000007770	ENSDARG00000018611	0.71371	0.772353	0.679181	0.721748	5.93551	3.66531	4.78485	4.795223333	2.97E-23	1.07E-21	20.97061622	-1.787695525
lbx2	non_periderm	ENSDART00000031508	ENSDARG00000025131	13.7509	13.5184	13.8645	13.71126667	21.6276	21.0682	21.4873	21.39436667	1.72E-07	1.44E-06	5.841637508	-0.366822791
lcn15	non_periderm	ENSDART00000097756	ENSDARG00000067851	1.06409	1.20893	0.332282	0.868434	0.170588	0.520919	0.614601	0.435369333	0.200344122	0.345036023	0.462135561	0.727608742
ldb3a	non_periderm	ENSDART00000074061	ENSDARG00000056322	8.72778	10.2739	12.0871	10.36292667	3.38725	3.69281	3.60341	3.561156667	1.48E-34	9.38E-33	32.02779716	1.144391853
ldhd	periderm	ENSDART00000056721	ENSDARG00000038845	0.926693	1.1694	0.975083	1.023725333	1.2479	1.13176	0.997916	1.125858667	0.932300277	0.960762725	0.017383855	-0.017402178
lef1	non_periderm	ENSDART00000132405	ENSDARG00000031894	6.57812	7.24404	8.83332	7.551826667	13.4592	14.4394	14.7929	14.2305	6.06E-13	9.59E-12	11.01818139	-0.557931397
lepr	periderm	ENSDART00000079173	ENSDARG00000070961	2.62866	2.82886	2.94604	2.801186667	1.27593	1.57717	1.56355	1.472216667	1.18E-14	2.18E-13	12.66154351	0.731340098
letm1	non_periderm	ENSDART00000079558	ENSDARG00000056978	18.8401	17.988	20.6123	19.1468	20.2533	23.5828	16.3094	20.0485	0.647101894	0.769975364	0.11352317	0.045536617
lfng	non_periderm	ENSDART00000028673	ENSDARG00000037879	124.881	129.057	138.718	130.8853333	204.689	210.559	208.164	207.804	4.59E-24	1.72E-22	21.76447155	-0.38067858
lft2	periderm	ENSDART00000064678	ENSDARG00000044059	0.0722701	0.149397	0.135434	0.1190337	0.0835619	0.295614	0.147919	0.1756983	0.811327404	0.885310439	0.052904415	-0.215641132
lgalslb	periderm	ENSDART00000147907	ENSDARG00000055525	3.08198	9.64474	2.46978	5.0655	16.0318	12.274	10.1825	12.82943333	0.01646473	0.046740704	1.330304751	-1.068975687
lgmn	periderm	ENSDART00000139087	ENSDARG00000039150	98.4719	99.1496	101.832	99.81783333	113.155	114.266	109.896	112.439	0.340625438	0.503773127	0.297765003	-0.038345837
lgsn	periderm	ENSDART00000020256	ENSDARG00000007715	1.02555	0.821463	1.04176	0.962924333	0.519046	0.590367	0	0.369804333	0.151981157	0.280796522	0.551608276	2.071800814
lhfpl2b	non_periderm	ENSDART00000163464	ENSDARG00000098153	58.5035	58.0182	59.3438	58.62183333	73.3597	78.6151	71.2019	74.39223333	0.000674795	0.002883463	2.540085617	-0.159894572
lhx1a	non_periderm	ENSDART00000134373	ENSDARG00000014018	2.20554	0.763113	0.75769	1.242114333	2.87132	1.144	1.85608	1.957133333	0.550348022	0.692666329	0.159475923	-0.466404126
lhx1b	non_periderm	ENSDART00000021159	ENSDARG00000007944	0.77856	0.906543	1.32874	1.004614333	0.914035	1.64625	1.27939	1.279891667	0.468339348	0.623565292	0.205118066	-0.159186793
lhx2b	non_periderm	ENSDART00000148020	ENSDARG00000031222	2.82169	3.02527	3.56777	3.138243333	10.8723	11.9163	10.3172	11.03526667	1.84E-52	2.09E-50	49.67985371	-1.176006548
lhx8b	non_periderm	ENSDART00000061776	ENSDARG00000042145	2.441	2.00291	1.89018	2.111363333	1.50432	2.04213	1.62152	1.722656667	0.023794453	0.063463755	1.197474235	0.290016948
lhx9	non_periderm	ENSDART00000054807	ENSDARG00000056979	2.75869	3.61657	4.02551	3.466923333	7.8638	10.412	14.4858	10.92053333	9.34E-08	8.12E-07	6.090443971	-1.050006303
lin28a	non_periderm	ENSDART00000171403	ENSDARG00000016999	94.3962	108.833	99.5749	100.9347	107.366	91.5162	89.3876	96.08993333	0.129327907	0.248228168	0.605148938	0.121340844
lingo1a	periderm	ENSDART00000149965	ENSDARG00000034165	0.122776	0.0241298	0.103571	0.083492267	0.177939	6.43E-07	0.0799029	0.085947514	0.716717468	0.821650221	0.085313024	0.442469298
lipin2	non_periderm	ENSDART00000141575	ENSDARG00000061214	2.79905	1.97524	3.32723	2.700506667	2.81932	3.31581	2.72007	2.951733333	0.875441247	0.926402213	0.033200416	-0.022958545
llgl2	periderm	ENSDART00000034550	ENSDARG00000023920	30.6101	30.2237	38.9219	33.2519	35.8911	40.6155	37.9026	38.1364	0.320014901	0.48171517	0.317209677	-0.058317132
lman1	non_periderm	ENSDART00000102304	ENSDARG00000069980	79.6249	78.7039	83.2157	80.51483333	21.0449	23.031	23.2232	22.43303333	7.86E-161	3.89E-158	157.4100504	1.357919762
lmbrd2a	non_periderm	ENSDART00000161261	ENSDARG00000099566	5.92419	5.8785	6.28449	6.02906	4.45331	5.00056	3.81522	4.42303	3.35E-08	3.09E-07	6.510041521	0.399866272
lmna	periderm	ENSDART00000145087	ENSDARG00000013415	18.0415	19.8576	23.0755	20.32486667	9.05329	11.3009	9.77233	10.04217333	5.65E-34	3.46E-32	31.4609239	0.788651515
lmnl3	periderm	ENSDART00000023944	ENSDARG00000007751	1.42418	1.48487	1.35887	1.42264	0.723026	0.491341	0.472439	0.562268667	1.31E-06	9.56E-06	5.019542108	1.017380217
lmo1	non_periderm	ENSDART00000044208	ENSDARG00000034504	1.78221	2.68493	2.30661	2.257916667	3.76037	3.45013	3.8076	3.6727	0.002522285	0.009272695	2.032794025	-0.420577344
lmo2	non_periderm	ENSDART00000134247	ENSDARG00000095019	126.596	131.732	122.831	127.053	159.528	168.329	155.213	161.0233333	0.000779312	0.003279705	2.484165218	-0.15896799
lmo3	non_periderm	ENSDART00000003583	ENSDARG00000008720	3.97511	3.94938	4.87667	4.267053333	3.90479	3.78508	3.53017	3.740013333	0.143183792	0.268357518	0.571286234	0.206816968
lmo4a	non_periderm	ENSDART00000085219	ENSDARG00000013853	44.8867	44.3213	43.2698	44.15926667	55.0226	53.8115	51.1994	53.3445	0.027639485	0.071909507	1.143213689	-0.110196294
lmo4b	non_periderm	ENSDART00000076997	ENSDARG00000054749	54.2907	54.7227	52.4062	53.80653333	58.2063	55.7625	57.4714	57.14673333	0.72992326	0.830625482	0.08059475	0.01718134
lmo7a	periderm	ENSDART00000136349	ENSDARG00000004930	4.33458	4.37055	5.16979	4.624973333	0.657287	0	0.906151	0.521146	0.0085549	0.026721962	1.573131658	2.901174439
lmtk2	periderm	ENSDART00000161534	ENSDARG00000076324	1.59874	1.90884	1.97909	1.82889	2.14788	1.74816	1.94577	1.94727	0.846912743	0.908050901	0.041889806	0.022942596
lnpa	non_periderm	ENSDART00000157818	ENSDARG00000063646	61.0782	65.5254	73.1146	66.57273333	50.0846	59.8862	62.8547	57.6085	0.00504259	0.016914074	1.771751774	0.203915618
lnpep	periderm	ENSDART00000163973	ENSDARG00000100394	6.20153	6.49978	7.84668	6.84933	7.7612	7.82005	6.82325	7.468166667	0.944531066	0.967821617	0.014204682	-0.005011237
loxl2a	periderm	ENSDART00000159672	ENSDARG00000044010	1.74373	2.20125	2.33198	2.09232	1.22627	1.43348	1.03688	1.23221	2.91E-07	2.36E-06	5.627087997	0.613841852
loxl2b	non_periderm	ENSDART00000064701	ENSDARG00000044074	17.305	18.1767	19.0846	18.18876667	8.44727	10.7432	10.0392	9.743223333	3.10E-21	9.90E-20	19.00436481	0.711764634
loxl5a	periderm	ENSDART00000144071	ENSDARG00000071680	1.04948	1.05532	0.981762	1.028854	0.817848	1.16408	1.47212	1.151349333	0.933365421	0.961276227	0.017151798	-0.055641322
loxl5b	periderm	ENSDART00000146160	ENSDARG00000076904	53.3209	55.4006	58.8062	55.84256667	4.81854	4.88352	4.67919	4.79375	5.00E-268	5.56E-265	264.2549252	2.531330461
lpar1	non_periderm	ENSDART00000158919	ENSDARG00000099840	14.3093	13.5032	13.5769	13.79646667	18.9155	19.0172	20.1458	19.3595	0.001668342	0.006432761	2.191602584	-0.264362069
lpar2a	periderm	ENSDART00000062081	ENSDARG00000042338	13.6345	15.2708	12.392	13.76576667	12.2264	12.3236	11.7522	12.10073333	0.017791394	0.049912332	1.301792139	0.199986623
lpar2b	periderm	ENSDART00000062426	ENSDARG00000042561	46.6446	45.7872	46.6651	46.36563333	30.3965	28.143	27.76	28.7665	2.46E-22	8.37E-21	20.07727454	0.554092637
lpcat4	periderm	ENSDART00000050687	ENSDARG00000035028	10.1446	10.0832	9.66489	9.96423	5.5988	6.63868	7.75142	6.662966667	1.83E-06	1.30E-05	4.886056648	0.490194374
lratb	non_periderm	ENSDART00000080576	ENSDARG00000096594	33.0686	30.879	31.2498	31.73246667	29.9777	29.4165	29.0259	29.47336667	0.066188271	0.146640333	0.833746562	0.138116352
lrig2	periderm	ENSDART00000141986	ENSDARG00000078561	9.82948	11.9947	14.8096	12.21126	17.8936	19.4188	15.7669	17.6931	0.004283792	0.014712547	1.832312137	-0.295159833
lrmp	non_periderm	ENSDART00000131973	ENSDARG00000045574	0.795279	0.755208	0.945718	0.832068333	0.647891	0.853546	0.548886	0.683441	0.511682594	0.659693018	0.180658112	0.268645773
lrp2a	non_periderm	ENSDART00000167243	ENSDARG00000102506	1.23966	1.37738	1.65147	1.422836667	1.74371	1.79621	1.59896	1.71296	0.145886057	0.272275786	0.56499098	-0.104078061
lrp5	non_periderm	ENSDART00000121724	ENSDARG00000006921	8.16336	7.3587	10.7419	8.754653333	11.6167	12.8308	11.4665	11.97133333	0.008882607	0.027590702	1.559237249	-0.238222404
lrp6	periderm	ENSDART00000168093	ENSDARG00000100143	5.32182	4.64086	5.80729	5.256656667	7.42788	6.78153	6.74915	6.986186667	0.120206268	0.234563595	0.629739391	-0.222600036
lrpap1	periderm	ENSDART00000145272	ENSDARG00000033604	30.4563	31.9813	31.4556	31.29773333	36.216	31.7359	33.9608	33.9709	0.985923248	0.992289612	0.003361555	-0.001032848
lrrc15	non_periderm	ENSDART00000104248	ENSDARG00000070792	1.35528	1.91516	1.58153	1.617323333	0.345189	0.479023	0.336111	0.386774333	2.03E-10	2.47E-09	8.607303047	1.498699512
lrrc4.1	non_periderm	ENSDART00000140028	ENSDARG00000069402	0.201753	0.502131	0.606541	0.436808333	0.869724	0.9314	1.5387	1.113274667	0.011827732	0.035224051	1.453160699	-0.912950992
lrrc58b	periderm	ENSDART00000092884	ENSDARG00000063509	40.0749	36.9377	42.0915	39.70136667	36.6226	37.2199	39.1158	37.65276667	0.018412397	0.051326987	1.289654229	0.128806007
lrrcc1	periderm	ENSDART00000113498	ENSDARG00000078535	4.01725	4.22242	5.16951	4.469726667	4.45532	6.4106	6.02704	5.630986667	0.205066416	0.350894927	0.45482291	-0.141434175
lrrfip2	periderm	ENSDART00000169083	ENSDARG00000010400	20.7431	20.2307	21.1455	20.70643333	22.8075	26.0565	21.9496	23.60453333	0.4594999	0.615864754	0.21051465	-0.04783014
lrrk2	periderm	ENSDART00000148718	ENSDARG00000006169	0.333134	0.38136	0.320132	0.344875333	0.000228109	0.369485	0.203228	0.19098037	0.235027592	0.387616477	0.41159777	1.987160702
lrrn1	non_periderm	ENSDART00000084389	ENSDARG00000060115	121.654	119.69	141.107	127.4836667	193.731	219.418	215.796	209.6483333	1.52E-25	6.23E-24	23.20551195	-0.415300578
lrrtm1	non_periderm	ENSDART00000133917	ENSDARG00000052713	10.0758	11.8335	11.7699	11.2264	14.674	13.6189	15.4375	14.5768	0.007617858	0.02420478	1.61609886	-0.181229173
lrrtm2	non_periderm	ENSDART00000105477	ENSDARG00000071374	0.83953	0.856363	0.732371	0.809421333	1.51987	1.33262	1.29273	1.38174	0.000246948	0.001167285	2.932823095	-0.448323785
lrrtm4l1	periderm	ENSDART00000141364	ENSDARG00000080015	0.1651	0.0811066	0.205584	0.150596867	0.142293	0	0	0.047431	0.102231816	0.206798037	0.684453588	1.823409048
lsm14ab	periderm	ENSDART00000160279	ENSDARG00000100553	56.7034	57.511	61.3786	58.531	73.879	82.9791	76.5101	77.7894	7.29E-07	5.55E-06	5.255707017	-0.200515307
lsr	periderm	ENSDART00000160456	ENSDARG00000099291	35.352	35.9286	38.5715	36.61736667	26.5498	29.0635	26.8731	27.49546667	4.77E-12	6.94E-11	10.15864053	0.368077337
ltc4s	non_periderm	ENSDART00000090711	ENSDARG00000062598	0.723614	0.883937	0.785427	0.797659333	0.821162	0.671855	0.79076	0.761259	0.541656255	0.685516836	0.163981875	0.126891312
lxn	periderm	ENSDART00000063285	ENSDARG00000043102	7.65886	7.35696	7.15979	7.39187	5.23607	4.00089	5.96975	5.068903333	0.000860818	0.003577065	2.446473168	0.453794452
lypd6	non_periderm	ENSDART00000020884	ENSDARG00000004307	7.8469	8.84817	10.3914	9.028823333	6.14577	4.72799	7.0701	5.981286667	0.000446158	0.001993299	2.700427551	0.488721274
lypd6b	non_periderm	ENSDART00000105623	ENSDARG00000077643	5.24803	5.98746	5.82605	5.68718	6.08162	5.89321	5.22528	5.73337	0.345227772	0.508804843	0.293448764	0.075788017
lyz	periderm	ENSDART00000080549	ENSDARG00000057789	2.32156	2.72542	1.59085	2.21261	0.300868	1.61562	0.83186	0.916116	0.044752571	0.10683975	0.971267137	1.047064386
mab21l2	non_periderm	ENSDART00000014608	ENSDARG00000015266	13.9631	11.9734	13.8026	13.24636667	38.2444	38.4079	39.8767	38.843	7.59E-57	9.87E-55	54.00568285	-0.99944083
maea	non_periderm	ENSDART00000075759	ENSDARG00000053691	43.7698	41.2316	41.6593	42.22023333	43.6902	46.0174	43.41	44.37253333	0.487622746	0.640083464	0.193763392	0.031971352
mafbb	periderm	ENSDART00000103650	ENSDARG00000070542	37.984	39.6337	39.7793	39.13233333	35.1086	35.1133	31.2839	33.83526667	9.17E-05	0.000476523	3.321916133	0.222827885
magt1	periderm	ENSDART00000080864	ENSDARG00000058062	58.0925	58.4173	53.2956	56.6018	33.5076	34.9396	32.2842	33.57713333	3.06E-23	1.10E-21	20.95860731	0.598154298
man1a1	periderm	ENSDART00000146052	ENSDARG00000005652	1.75664	1.78793	1.95806	1.83421	1.32617	1.22182	1.47872	1.342236667	8.22E-06	5.24E-05	4.280668713	0.399969678
man2a1	periderm	ENSDART00000171252	ENSDARG00000102200	1.61104	1.89441	1.84076	1.78207	1.26338	1.50979	1.32878	1.367316667	0.002939441	0.010605813	1.974456035	0.348594836
map2k5	periderm	ENSDART00000052404	ENSDARG00000011851	4.50565	3.47849	4.5831	4.18908	4.93341	4.18774	4.68571	4.602286667	0.889043082	0.934593778	0.029377115	-0.014867436
map2k6	non_periderm	ENSDART00000171268	ENSDARG00000099184	148.521	151.119	152.486	150.7086667	204.816	208.484	207.983	207.0943333	1.15E-09	1.27E-08	7.896196279	-0.240569547
map3k10	periderm	ENSDART00000088309	ENSDARG00000055672	0.121477	0.261663	0.168835	0.183991667	0.357182	0.297598	0.257705	0.304161667	0.329554523	0.491646587	0.308346971	-0.450539636
map3k3	non_periderm	ENSDART00000084932	ENSDARG00000060348	1.02009	1.24315	1.74656	1.3366	0.804951	1.37748	1.25395	1.145460333	0.228265467	0.379398386	0.420904521	0.239845449
map3k4	non_periderm	ENSDART00000171371	ENSDARG00000104835	22.5715	26.2663	30.8862	26.57466667	32.8243	37.3931	34.3167	34.8447	0.003548107	0.012510414	1.902728318	-0.192329549
map3k9	periderm	ENSDART00000146522	ENSDARG00000013491	0.131434	0.139733	0.131411	0.134192667	0	0.0972727	0.00663852	0.034637073	0.09101796	0.188635953	0.72437553	1.840862367
map4k5	periderm	ENSDART00000029824	ENSDARG00000039125	23.7447	23.9287	27.1128	24.92873333	34.6129	37.1922	38.0708	36.6253	9.24E-11	1.18E-09	8.928117993	-0.301985881
map7d1a	non_periderm	ENSDART00000161393	ENSDARG00000098802	29.9757	28.3787	28.5453	28.96656667	28.5151	29.8754	29.5113	29.3006	0.217291669	0.366235549	0.436239503	0.071249399
mapk10	non_periderm	ENSDART00000159899	ENSDARG00000102730	0.994104	1.24007	1.18416	1.139444667	0.971196	0.513649	0.280496	0.588447	0.078019577	0.167033376	0.777196741	0.847576404
mapk11	non_periderm	ENSDART00000032857	ENSDARG00000045836	32.5117	33.2066	32.0234	32.58056667	43.7312	48.0293	43.9246	45.22836667	1.31E-06	9.56E-06	5.019542108	-0.247418234
mapk12b	non_periderm	ENSDART00000027304	ENSDARG00000006409	39.8541	42.298	40.9034	41.0185	69.5258	67.0344	67.5696	68.04326667	4.53E-17	1.03E-15	14.98716278	-0.430055692
mapk14b	periderm	ENSDART00000040147	ENSDARG00000028721	9.95732	12.6895	17.0214	13.22274	20.265	22.2515	17.8572	20.12456667	0.008378947	0.026250644	1.580860038	-0.361796195
mapk6	non_periderm	ENSDART00000029549	ENSDARG00000032103	41.9706	43.8731	44.2652	43.36963333	18.1116	19.9402	17.3047	18.45216667	1.46E-65	2.36E-63	62.627088	0.93831694
mapkapk3	periderm	ENSDART00000157625	ENSDARG00000089016	18.4823	17.3353	19.2288	18.3488	19.1691	21.6641	19.9219	20.2517	0.769656482	0.858357984	0.066331549	-0.019043723
mark2b	periderm	ENSDART00000173994	ENSDARG00000032458	5.54571	5.85031	7.22595	6.207323333	9.13125	8.76043	7.66018	8.517286667	0.001555776	0.006046525	2.218494147	-0.235148413
marveld1	non_periderm	ENSDART00000019379	ENSDARG00000011724	38.2332	40.4505	37.5374	38.74036667	30.534	37.6941	33.2605	33.82953333	0.005127733	0.017152813	1.765664647	0.202163075
max	periderm	ENSDART00000046035	ENSDARG00000024844	93.0139	94.4697	85.6108	91.03146667	61.5029	52.8737	63.5669	59.3145	3.01E-08	2.79E-07	6.554395797	0.508027965
mbd3b	non_periderm	ENSDART00000048775	ENSDARG00000042029	85.2	90.3302	78.0561	84.52876667	135.153	134.709	145.889	138.5836667	4.73E-08	4.27E-07	6.369572125	-0.41751802
mblac2	periderm	ENSDART00000083229	ENSDARG00000059689	1.68126	0.670673	2.16213	1.504687667	1.3014	2.42971	0.951048	1.560719333	0.976804401	0.986527845	0.005890652	-0.012306304
mbnl1	periderm	ENSDART00000098061	ENSDARG00000052978	1.58826	2.16001	2.48589	2.078053333	2.58883	1.67209	1.17487	1.81193	0.325745732	0.487270845	0.312229573	0.249441595
mcf2a	non_periderm	ENSDART00000034883	ENSDARG00000022895	0.378216	0.166876	0.377473	0.307521667	0.362381	0.34016	0.292545	0.331695333	0.848276885	0.908760345	0.041550632	-0.051924735
mchr2	non_periderm	ENSDART00000052440	ENSDARG00000036117	2.40409	2.60948	3.07881	2.69746	2.93595	2.65477	2.2853	2.62534	0.283930533	0.443226851	0.353373938	0.110301017
mcl1b	periderm	ENSDART00000149520	ENSDARG00000008363	36.8748	34.6841	30.9201	34.15966667	19.2201	15.4952	17.1829	17.2994	6.56E-12	9.40E-11	10.02687215	0.75799825
mcm3ap	periderm	ENSDART00000008053	ENSDARG00000021402	7.96001	8.52296	12.3199	9.600956667	13.9618	15.0565	13.4173	14.1452	0.003223997	0.011511226	1.938878419	-0.319424755
mcm5	non_periderm	ENSDART00000024316	ENSDARG00000019507	266.956	269.108	289.792	275.2853333	403.333	425.947	414.775	414.685	1.50E-18	3.86E-17	16.4134127	-0.328600577
mdka	non_periderm	ENSDART00000173600	ENSDARG00000036036	460.786	464.921	412.181	445.9626667	621.42	597.321	619.459	612.7333333	0.000192637	0.000934888	3.029240415	-0.26384374
mdkb	non_periderm	ENSDART00000003042	ENSDARG00000020708	153.379	151.291	135.773	146.8143333	267.074	258.141	259.749	261.6546667	5.23E-13	8.32E-12	11.07987667	-0.51122585
mecp2	non_periderm	ENSDART00000040672	ENSDARG00000014218	0.678495	0.388766	0.54786	0.538373667	0.000115907	1.09889	1.35266	0.817221969	0.60163583	0.733913025	0.134355405	0.827725232
mecr	non_periderm	ENSDART00000039054	ENSDARG00000032326	4.19287	5.39399	5.21482	4.933893333	6.20375	5.20856	5.92884	5.780383333	0.447285799	0.60519536	0.21810441	-0.084672575
med10	non_periderm	ENSDART00000103887	ENSDARG00000070623	90.3026	90.0631	76.8213	85.729	82.2638	73.1429	76.7109	77.37253333	0.085986143	0.180146989	0.744372992	0.157972907
med12	non_periderm	ENSDART00000163682	ENSDARG00000103953	26.0354	29.2401	38.0889	31.12146667	41.7995	36.0429	36.2632	38.0352	0.223834594	0.373992556	0.427137042	-0.125232308
med19a	periderm	ENSDART00000054410	ENSDARG00000037392	140.404	126.288	139.175	135.289	143.173	138.362	153.144	144.893	0.97347621	0.984422842	0.006818318	-0.001856397
med21	periderm	ENSDART00000032460	ENSDARG00000026839	207.475	203.314	172.818	194.5356667	174.447	167.377	160.36	167.3946667	0.024080991	0.064103173	1.193120473	0.203352222
med23	periderm	ENSDART00000141595	ENSDARG00000029157	24.3763	25.6531	27.6318	25.88706667	40.1181	40.4397	38.5853	39.71436667	7.12E-12	1.02E-10	9.991399828	-0.3443552
med31	non_periderm	ENSDART00000124416	ENSDARG00000008020	79.671	74.0012	80.8633	78.1785	66.8499	66.1681	74.1245	69.0475	0.002283801	0.008506508	2.070248685	0.183298899
mef2ca	non_periderm	ENSDART00000027392	ENSDARG00000029764	5.64058	6.11041	6.84985	6.20028	3.94981	4.35333	4.04979	4.117643333	6.13E-09	6.21E-08	7.2069084	0.490865176
megf11	non_periderm	ENSDART00000147902	ENSDARG00000062686	0.345052	0.0922318	0.143742	0.193675267	0.323201	0.317062	0.155765	0.265342667	0.476388794	0.630276692	0.200468753	-0.322689799
megf8	non_periderm	ENSDART00000170671	ENSDARG00000103934	8.00802	7.09529	4.53589	6.5464	5.81961	7.06832	6.62684	6.504923333	0.990032964	0.994792895	0.002267325	-0.0036003
meis2a	non_periderm	ENSDART00000161414	ENSDARG00000098240	18.2794	18.9384	19.7962	19.00466667	26.115	29.8695	31.9815	29.322	7.99E-10	9.06E-09	8.042871802	-0.347757564
meis3	non_periderm	ENSDART00000018945	ENSDARG00000002795	30.5381	30.5173	26.3371	29.13083333	22.0771	21.9033	18.6301	20.87016667	1.03E-05	6.44E-05	4.191114133	0.41549434
meox1	non_periderm	ENSDART00000105661	ENSDARG00000007891	151.526	155.977	153.892	153.7983333	167.522	175.509	174.947	172.6593333	0.376317827	0.540053614	0.267563123	-0.033553071
met	non_periderm	ENSDART00000148741	ENSDARG00000070903	8.73296	8.90015	9.47929	9.037466667	17.4914	20.3876	20.4222	19.43373333	5.70E-36	3.84E-34	33.41566878	-0.679012955
metrn	non_periderm	ENSDART00000041805	ENSDARG00000030367	97.9666	106.328	114.845	106.3798667	133.707	141.413	129.201	134.7736667	4.75E-05	0.000261249	3.582945363	-0.155052986
mettl5	periderm	ENSDART00000099794	ENSDARG00000068893	24.0685	27.1205	23.8048	24.99793333	34.882	37.1551	39.1719	37.06966667	6.70E-06	4.34E-05	4.36251027	-0.326781768
mfsd6a	periderm	ENSDART00000157820	ENSDARG00000032318	4.62903	2.94488	3.82097	3.798293333	4.56953	3.93562	4.28464	4.263263333	0.747855904	0.843024895	0.0741596	-0.04846479
mfsd6b	periderm	ENSDART00000135821	ENSDARG00000054583	1.9963	1.64501	2.38218	2.00783	0.481006	0.877323	0.636414	0.664914333	3.26E-11	4.36E-10	9.360513511	1.201006722
mgat5	periderm	ENSDART00000105788	ENSDARG00000071506	5.12934	5.63295	6.74629	5.836193333	5.46373	5.93504	4.95798	5.45225	0.023207739	0.062122218	1.206753047	0.149380982
mgp	non_periderm	ENSDART00000158759	ENSDARG00000086189	32.9671	23.3809	23.1335	26.49383333	4.50838	2.59462	5.13093	4.077976667	1.55E-05	9.38E-05	4.027797162	1.920069371
mgst2	periderm	ENSDART00000136045	ENSDARG00000071345	25.1908	24.9799	25.5233	25.23133333	23.6187	25.8824	25.8463	25.1158	0.389836566	0.552928463	0.257331053	0.069823554
mibp	non_periderm	ENSDART00000158846	ENSDARG00000101362	296.367	274.354	272.814	281.1783333	235.132	266.62	260.922	254.2246667	0.046864795	0.110856797	0.955237674	0.125190116
mid1ip1a	periderm	ENSDART00000060150	ENSDARG00000041051	70.0296	70.3676	59.529	66.64206667	12.7878	14.9431	14.285	14.0053	5.84E-70	1.06E-67	66.97469413	1.629037311
mid1ip1b	non_periderm	ENSDART00000007649	ENSDARG00000019302	5.03346	4.14145	4.08111	4.418673333	5.17347	4.58903	4.06467	4.609056667	0.75782088	0.850011159	0.070575373	0.036051243
mid1ip1l	periderm	ENSDART00000003170	ENSDARG00000018145	106.038	105.789	101.316	104.381	53.6357	53.9951	58.427	55.3526	1.52E-36	1.04E-34	33.98296666	0.706581704
mier1a	periderm	ENSDART00000169605	ENSDARG00000041072	24.4149	18.123	21.457	21.33163333	25.1067	23.3291	23.5753	24.0037	0.668591305	0.786817143	0.104126186	-0.043875495
mink1	periderm	ENSDART00000051233	ENSDARG00000035360	2.43935	3.89707	2.58231	2.97291	5.78273	4.03783	3.5489	4.456486667	0.116510869	0.229046926	0.640075532	-0.336540196
mkln1	non_periderm	ENSDART00000137736	ENSDARG00000025576	7.0099	6.92354	6.96862	6.967353333	5.4938	7.11709	6.65511	6.422	0.02305205	0.061771326	1.209213076	0.171278461
mkrn2	periderm	ENSDART00000019997	ENSDARG00000007630	10.842	13.825	12.5483	12.4051	6.37278	9.74001	6.89588	7.669556667	0.000247345	0.001168693	2.932299557	0.571989036
mllt3	non_periderm	ENSDART00000021502	ENSDARG00000006754	18.5285	16.633	15.6863	16.94926667	12.9812	12.5707	11.8117	12.45453333	2.83E-06	1.95E-05	4.709965389	0.387582181
mmadhc	periderm	ENSDART00000012478	ENSDARG00000005870	26.1481	24.5162	26.1868	25.61703333	25.2362	24.2866	27.6883	25.73703333	0.280030731	0.438967092	0.357568036	0.070950701
mmp14a	non_periderm	ENSDART00000005884	ENSDARG00000002235	15.207	15.3054	16.8961	15.80283333	21.8054	22.9804	21.6935	22.15976667	1.55E-06	1.11E-05	4.954677021	-0.255429704
mmp17a	non_periderm	ENSDART00000151200	ENSDARG00000078915	0.391964	0.0884693	0.140263	0.206898767	0.123847	0.0978153	0.0879256	0.103195967	0.478188521	0.632020743	0.199268668	0.548423901
mmp24	periderm	ENSDART00000047399	ENSDARG00000018896	0.186113	0.152204	0.24085	0.193055667	0.0925321	0.330443	0.205593	0.2095227	0.770290816	0.858507076	0.066256121	0.106889145
mms22l	non_periderm	ENSDART00000134381	ENSDARG00000074691	21.1434	22.7461	25.7564	23.2153	37.9831	42.2983	38.6668	39.6494	2.35E-23	8.50E-22	21.07058107	-0.453433043
mnat1	periderm	ENSDART00000006648	ENSDARG00000002077	15.5602	13.6195	11.2612	13.4803	13.3262	16.7936	13.3398	14.48653333	0.980442937	0.988874924	0.004858636	-0.003405344
mob3c	periderm	ENSDART00000064176	ENSDARG00000043705	4.12859	4.40904	4.78954	4.44239	4.45854	4.48874	4.28815	4.41181	0.516035394	0.663527312	0.178141196	0.081138078
mocs3	non_periderm	ENSDART00000009528	ENSDARG00000008239	15.1318	12.8913	14.3175	14.11353333	13.1933	14.013	13.8845	13.69693333	0.18707301	0.327734294	0.484478112	0.104113566
morc2	non_periderm	ENSDART00000037973	ENSDARG00000028539	33.682	34.0504	36.4497	34.72736667	47.1298	56.7034	52.8532	52.2288	3.41E-14	6.01E-13	12.22112553	-0.321675119
morc3a	periderm	ENSDART00000101085	ENSDARG00000056679	6.21963	6.66196	7.10794	6.663176667	8.07928	8.62473	8.01619	8.240066667	0.058166987	0.131997881	0.879433041	-0.129463821
morc3b	non_periderm	ENSDART00000074450	ENSDARG00000043271	11.4111	11.7927	12.7953	11.9997	12.39	14.5097	13.7688	13.55616667	0.546533624	0.68956556	0.161424437	-0.038456726
morf4l1	non_periderm	ENSDART00000139441	ENSDARG00000041155	126.663	128.402	127.052	127.3723333	172.475	184.315	176.479	177.7563333	3.60E-10	4.26E-09	8.370590401	-0.256252548
morn5	non_periderm	ENSDART00000041382	ENSDARG00000033610	1.4397	1.07958	1.14727	1.222183333	1.87374	1.82569	0.932973	1.544134333	0.632363882	0.758572526	0.120002891	-0.117407903
mphosph8	periderm	ENSDART00000080404	ENSDARG00000005576	30.9075	30.2838	31.8166	31.00263333	36.8033	38.8107	39.2233	38.2791	0.004108429	0.014188265	1.848070709	-0.126441934
mpp5a	non_periderm	ENSDART00000014306	ENSDARG00000006272	11.5728	12.8072	15.5392	13.3064	22.925	23.9978	19.9299	22.28423333	5.71E-09	5.80E-08	7.236572006	-0.437381148
mppe1	periderm	ENSDART00000066783	ENSDARG00000045416	13.9557	11.7164	12.5308	12.7343	13.1115	11.4314	12.7344	12.42576667	0.245896302	0.400252285	0.39766618	0.102066021
mpv17l2	periderm	ENSDART00000078854	ENSDARG00000056367	25.7659	25.1082	24.1723	25.01546667	21.8739	21.8188	21.8407	21.84446667	0.001370575	0.005406994	2.267044112	0.210823117
mpz	non_periderm	ENSDART00000137253	ENSDARG00000038609	10.2571	7.5782	9.36887	9.068056667	6.35211	12.3559	7.76132	8.82311	0.652702767	0.774543517	0.110954177	0.094578387
mri1	non_periderm	ENSDART00000111671	ENSDARG00000075754	16.0944	15.8349	17.9446	16.62463333	27.9781	24.1101	19.1675	23.7519	0.015737257	0.044995356	1.346832308	-0.269812625
mrm1	non_periderm	ENSDART00000083137	ENSDARG00000059658	2.44095	3.70021	2.77215	2.971103333	3.14522	3.45289	2.7358	3.111303333	0.86470887	0.91985579	0.036280254	0.023501739
mrpl12	periderm	ENSDART00000056618	ENSDARG00000038768	157.152	159.039	154.758	156.983	186.287	177.84	174.348	179.4916667	0.138384618	0.261204909	0.583018665	-0.066961601
mrpl13	non_periderm	ENSDART00000079480	ENSDARG00000056903	248.533	237.123	223.436	236.364	188.187	176.255	181.599	182.0136667	1.86E-06	1.32E-05	4.879426069	0.307311311
mrpl14	non_periderm	ENSDART00000099782	ENSDARG00000068886	121.859	126.71	105.427	117.9986667	108.963	94.3769	99.9874	101.1091	0.04360749	0.10463212	0.980334975	0.192293368
mrpl23	non_periderm	ENSDART00000067179	ENSDARG00000045696	118.831	116.381	109.846	115.0193333	108.351	112.357	114.506	111.738	0.083738234	0.176381734	0.753546392	0.097088214
mrpl38	periderm	ENSDART00000057983	ENSDARG00000039667	118.335	121.859	112.061	117.4183333	155.895	135.988	140.226	144.0363333	0.070695941	0.154445975	0.811223405	-0.131285288
mrpl39	periderm	ENSDART00000147633	ENSDARG00000041570	77.3952	73.7028	71.4183	74.1721	67.0266	68.3212	71.1291	68.82563333	0.010045011	0.030651107	1.513553836	0.146089844
mrps11	non_periderm	ENSDART00000112980	ENSDARG00000075129	123.935	133.794	120.465	126.0646667	105.826	98.2019	96.2377	100.0885333	3.20E-06	2.18E-05	4.661543506	0.290229253
mrps14	periderm	ENSDART00000098736	ENSDARG00000068305	141.248	136.833	132.942	137.0076667	120.922	104.615	123.53	116.3556667	0.004908006	0.016534284	1.781614607	0.21542249
mrps18b	periderm	ENSDART00000023074	ENSDARG00000007065	60.8538	59.9268	61.7749	60.85183333	90.3047	78.4604	86.7118	85.15896667	4.72E-06	3.12E-05	4.505845406	-0.265785274
ms4a17a.11	periderm	ENSDART00000021194	ENSDARG00000053561	5.09429	5.2835	6.21317	5.53032	4.34726	3.74285	4.56415	4.218086667	0.004089406	0.014131477	1.849812444	0.345112183
msh2	non_periderm	ENSDART00000002465	ENSDARG00000018022	44.9361	46.1866	47.1301	46.08426667	64.3622	65.3277	59.5859	63.09193333	6.55E-08	5.80E-07	6.236572006	-0.230858898
msh6	periderm	ENSDART00000171080	ENSDARG00000104541	20.0628	21.1244	22.3007	21.16263333	34.8656	37.5994	34.4625	35.6425	6.88E-22	2.27E-20	19.64397414	-0.436945534
msi2a	non_periderm	ENSDART00000132096	ENSDARG00000033901	5.70617	7.35108	6.61691	6.558053333	6.33768	8.08761	7.51519	7.313493333	0.766537761	0.856110605	0.067470123	-0.028928705
msi2b	non_periderm	ENSDART00000154311	ENSDARG00000032614	14.3338	16.0894	14.7287	15.05063333	11.0428	9.47342	11.4808	10.66567333	0.000988772	0.004045514	2.393026292	0.400771408
mst1ra	periderm	ENSDART00000084667	ENSDARG00000060235	1.3669	1.56774	1.82152	1.585386667	1.65212	1.67881	1.0493	1.460076667	0.248036672	0.402676144	0.395044099	0.183002886
msto1	periderm	ENSDART00000037515	ENSDARG00000024381	25.5475	26.2362	28.1236	26.63576667	42.5082	44.2573	41.6839	42.81646667	1.24E-17	2.97E-16	15.52724355	-0.391554931
mta3	periderm	ENSDART00000127454	ENSDARG00000054903	94.3663	95.9596	95.2829	95.20293333	109.689	113.047	109.163	110.633	0.099183287	0.201985202	0.694680447	-0.070996552
mthfd2l	non_periderm	ENSDART00000169304	ENSDARG00000054199	0.46528	0.611468	0.49763	0.524792667	0.24779	0.149129	0.265908	0.220942333	0.003182896	0.011385022	1.943666126	0.956122581
mtif3	non_periderm	ENSDART00000144879	ENSDARG00000039649	19.7125	18.6547	20.9467	19.7713	18.968	21.0584	19.6448	19.8904	0.496281756	0.647241756	0.188933473	0.059497662
mtmr10	periderm	ENSDART00000127131	ENSDARG00000010601	2.99102	4.43275	5.19806	4.207276667	6.30728	7.54613	7.61834	7.15725	0.001513857	0.005909404	2.228456318	-0.472360665
mtmr7b	non_periderm	ENSDART00000169081	ENSDARG00000070412	6.7621	6.83342	8.98034	7.525286667	8.07124	9.49756	9.11648	8.895093333	0.241581443	0.39522227	0.403158592	-0.092764039
mtnr1ba	non_periderm	ENSDART00000075940	ENSDARG00000053833	0.743965	0.477187	0.461498	0.560883333	0.50401	0.593655	0.534958	0.544207667	0.849832957	0.9097132	0.041095504	0.077876257
mtp	periderm	ENSDART00000079930	ENSDARG00000008637	0.770575	0.629306	0.551564	0.650481667	0.513307	0.535066	0.48076	0.509711	0.223504455	0.373630036	0.427558218	0.31268846
musk	non_periderm	ENSDART00000164299	ENSDARG00000098764	14.4083	14.3968	16.8483	15.2178	4.43819	5.61958	5.02646	5.028076667	1.76E-61	2.57E-59	58.59006688	1.191964601
mvk	non_periderm	ENSDART00000006673	ENSDARG00000004130	11.4401	11.0929	10.8537	11.1289	11.1099	11.4545	11.9195	11.49463333	0.575008699	0.712572982	0.147170648	0.045394864
mxb	non_periderm	ENSDART00000009315	ENSDARG00000004953	0.238738	0.145143	0	0.127960333	0.316769	0.1959	0.107866	0.206845	0.381048003	0.54464706	0.263884836	-0.978252403
mxd1	periderm	ENSDART00000134064	ENSDARG00000032039	0.951422	1.49042	1.94242	1.461420667	0.955045	1.02311	0.921774	0.966643	0.095493362	0.19594253	0.707871289	0.43925005
mybpc2b	periderm	ENSDART00000105672	ENSDARG00000021265	8.77371	12.7079	10.0756	10.51907	3.75509	7.41671	4.25349	5.141763333	0.000168688	0.000828823	3.081538206	0.833332151
myca	non_periderm	ENSDART00000111014	ENSDARG00000045695	30.6732	30.6017	33.3124	31.5291	29.2287	32.3333	30.7058	30.75593333	0.069076133	0.151604785	0.819287091	0.103075649
myf5	non_periderm	ENSDART00000127664	ENSDARG00000007277	58.2233	57.0325	53.6021	56.28596667	53.4057	64.1175	54.2122	57.24513333	0.54566603	0.688758488	0.161933036	0.059944349
myh10	periderm	ENSDART00000151114	ENSDARG00000000103	20.2774	20.5243	27.0814	22.6277	39.1537	41.1296	35.5217	38.60166667	1.23E-09	1.36E-08	7.866461092	-0.455349635
myh9a	periderm	ENSDART00000105232	ENSDARG00000063295	47.0945	55.4462	59.8166	54.1191	27.8682	34.2825	29.1265	30.42573333	4.50E-24	1.68E-22	21.77469072	0.660977317
myl10	non_periderm	ENSDART00000159666	ENSDARG00000062592	2505.4	2491.71	2237.01	2411.373333	1397.9	1210.24	1272.14	1293.426667	1.19E-16	2.61E-15	14.58335949	0.672833534
mylka	non_periderm	ENSDART00000124885	ENSDARG00000090738	0.300969	0.185614	0.449925	0.312169333	0.287057	0	0.180784	0.155947	0.34337136	0.506781916	0.295178891	0.989481818
mylpfa	non_periderm	ENSDART00000075465	ENSDARG00000053254	106.76	105.917	91.3232	101.3334	29.0338	30.5818	28.844	29.48653333	1.32E-59	1.85E-57	56.73282827	1.306666779
myo10l1	non_periderm	ENSDART00000151252	ENSDARG00000074723	0.156839	0.220553	0.213715	0.197035667	0.172759	0.374058	0.160009	0.235608667	0.921963906	0.955002287	0.019995588	-0.026340031
myo10l3	non_periderm	ENSDART00000088042	ENSDARG00000074143	4.16046	4.78532	5.39471	4.780163333	4.74254	4.1535	3.5433	4.146446667	0.02171896	0.058849244	1.230259112	0.230191067
myo16	non_periderm	ENSDART00000133063	ENSDARG00000078582	1.74948	2.50202	1.85127	2.034256667	1.43586	1.65386	0.767172	1.285630667	0.056754716	0.129345254	0.888249502	0.554621004
myo18ab	non_periderm	ENSDART00000153951	ENSDARG00000061862	4.12998	5.41715	6.1849	5.24401	4.12703	4.32175	4.30579	4.251523333	0.002562314	0.009403608	2.026705483	0.282739912
myo3a	periderm	ENSDART00000136041	ENSDARG00000010186	0.615208	0.583748	0.682843	0.627266333	0.480666	0.509716	0.535139	0.508507	0.030566616	0.078205211	1.106764308	0.293763079
myo6b	periderm	ENSDART00000131566	ENSDARG00000042141	0.48996	1.10702	1.89727	1.16475	1.55931	0.801779	0.505626	0.955571667	0.617706729	0.747081161	0.126632215	0.245540167
myo7aa	non_periderm	ENSDART00000166980	ENSDARG00000099871	0.339837	0.40386	0.487898	0.410531667	0.667519	0.610815	0.524516	0.60095	0.474233004	0.628259954	0.201860622	-0.299793037
myo9b	periderm	ENSDART00000144807	ENSDARG00000077410	0.686157	1.73991	1.63223	1.352765667	0.705111	0.720253	1.0449	0.823421333	0.296851632	0.457224182	0.339870808	0.518732445
myof	non_periderm	ENSDART00000144283	ENSDARG00000006112	0.89474	0.845973	1.32605	1.022254333	0.664537	0.443786	0.408153	0.505492	5.52E-05	0.000299885	3.523045257	0.790214206
myog	non_periderm	ENSDART00000014062	ENSDARG00000009438	110.124	104.666	91.4595	102.0831667	74.0141	68.3802	65.0824	69.1589	1.15E-06	8.41E-06	5.075204004	0.461275866
myoz1a	periderm	ENSDART00000060576	ENSDARG00000056209	0.679131	0.971767	0.896731	0.849209667	0.222571	0.182965	0.456406	0.287314	0.000194782	0.000944394	3.024846781	1.205961959
myoz1b	non_periderm	ENSDART00000131896	ENSDARG00000071445	0.243176	0.392678	0.566991	0.400948333	0.676288	0.158422	0	0.278236667	0.28129506	0.440348132	0.356203842	1.063076849
myoz2a	periderm	ENSDART00000049928	ENSDARG00000012311	5.727	5.25979	4.64368	5.210156667	0.461977	0.649523	0.645667	0.585722333	4.55E-21	1.43E-19	18.84466396	2.247086792
mysm1	periderm	ENSDART00000125133	ENSDARG00000034693	8.16308	8.05251	9.21046	8.47535	9.52411	10.0147	9.78913	9.77598	0.346898037	0.510611428	0.291909469	-0.060714734
naa35	periderm	ENSDART00000098707	ENSDARG00000012378	72.3913	67.5954	69.0137	69.6668	83.9481	88.4339	84.8903	85.75743333	0.0031283	0.011224688	1.949825722	-0.127113089
naa40	non_periderm	ENSDART00000039265	ENSDARG00000024109	240.646	239.65	244.677	241.6576667	338.786	341.135	334.588	338.1696667	7.97E-12	1.13E-10	9.946921557	-0.257477966
nadka	periderm	ENSDART00000131514	ENSDARG00000006577	11.389	9.79995	9.14607	10.11167333	3.88696	4.42101	4.48509	4.264353333	1.12E-05	6.95E-05	4.158015195	0.890039394
nadl1.1	non_periderm	ENSDART00000132175	ENSDARG00000015025	0.473537	0.383429	0.65053	0.502498667	0.371436	0.245037	0.0822712	0.232914733	0.030852683	0.078806897	1.103435772	0.98938347
naif1	non_periderm	ENSDART00000143242	ENSDARG00000062753	2.04351	2.14671	1.689	1.95974	1.28639	2.22606	2.15409	1.888846667	0.632096322	0.758328198	0.120142795	0.122632743
nap1l1	non_periderm	ENSDART00000166360	ENSDARG00000101813	177.837	179.459	186.296	181.1973333	239.616	260.224	249.223	249.6876667	2.25E-10	2.73E-09	8.563837353	-0.23674701
nap1l4a	periderm	ENSDART00000103704	ENSDARG00000070560	96.9548	95.8835	100.716	97.85143333	106.707	114.795	112.147	111.2163333	0.243345163	0.397268174	0.400916226	-0.048330279
nap1l4b	non_periderm	ENSDART00000099748	ENSDARG00000068868	5.68433	5.12651	5.34903	5.386623333	6.79279	6.97636	6.96896	6.912703333	0.033980124	0.085283824	1.069133335	-0.166948143
narfl	periderm	ENSDART00000089679	ENSDARG00000062216	7.70925	9.16296	8.88838	8.586863333	12.5451	14.6453	11.9239	13.0381	0.000142279	0.000710636	3.148352795	-0.336817012
nat8l	non_periderm	ENSDART00000121684	ENSDARG00000077256	32.0401	31.1399	32.9123	32.03076667	36.5486	39.5667	37.0919	37.73573333	0.056750443	0.129345254	0.888249502	-0.078099286
nav3	periderm	ENSDART00000005847	ENSDARG00000005476	1.76702	1.7871	2.31665	1.956923333	1.63747	1.36405	1.53667	1.51273	0.000687681	0.002935006	2.532391007	0.338037378
nbeal2	periderm	ENSDART00000160602	ENSDARG00000098641	0.146174	0.213381	0.265623	0.208392667	0.0663052	0	0.1887	0.085001733	0.152902906	0.282045907	0.549680198	2.048790373
ncalda	non_periderm	ENSDART00000104058	ENSDARG00000070688	83.3819	78.379	79.2091	80.32333333	110.79	118.703	110.473	113.322	4.15E-09	4.30E-08	7.366531544	-0.262113491
ncam1a	non_periderm	ENSDART00000145469	ENSDARG00000056181	11.1395	6.8355	8.77565	8.916883333	6.75903	7.31116	5.53177	6.533986667	0.137173458	0.259731028	0.585476166	0.321629875
nccrp1	periderm	ENSDART00000051186	ENSDARG00000035326	16.3491	16.192	16.8618	16.46763333	11.2615	11.3232	11.5784	11.3877	6.50E-09	6.56E-08	7.183096161	0.445597256
ncoa1	periderm	ENSDART00000130513	ENSDARG00000018257	1.93762	2.42012	2.3844	2.24738	4.0022	3.91586	4.02855	3.982203333	7.51E-10	8.54E-09	8.068542129	-0.491101767
ncoa2	periderm	ENSDART00000124740	ENSDARG00000017929	4.80787	4.70949	6.25504	5.257466667	5.18952	6.57725	5.97413	5.913633333	0.674395865	0.791008021	0.101819113	-0.035262635
ncoa6	non_periderm	ENSDART00000105286	ENSDARG00000071272	9.82016	10.7594	12.9072	11.16225333	13.8193	14.7485	13.5309	14.0329	0.004580727	0.015576134	1.807540325	-0.148642388
ndel1a	periderm	ENSDART00000022495	ENSDARG00000010953	6.64665	6.60532	9.07988	7.44395	3.45087	3.57757	3.62982	3.552753333	7.35E-15	1.38E-13	12.86012091	0.806365249
ndel1b	periderm	ENSDART00000169923	ENSDARG00000104225	23.9125	23.3048	26.4884	24.56856667	16.7023	17.3118	16.8222	16.94543333	1.25E-18	3.25E-17	16.48811664	0.45351171
ndst3	non_periderm	ENSDART00000061232	ENSDARG00000041776	5.37362	5.25189	6.1187	5.581403333	7.80729	7.38421	7.33629	7.509263333	0.010799618	0.032598406	1.486803636	-0.214677001
ndufa7	periderm	ENSDART00000053285	ENSDARG00000036684	146.668	129.622	127.206	134.4986667	118.825	97.875	97.0173	104.5724333	0.003007352	0.010831395	1.965315606	0.273790814
ndufb4	periderm	ENSDART00000080510	ENSDARG00000019332	482.23	481.736	418.109	460.6916667	355.994	303.53	309.435	322.9863333	1.89E-05	0.000112568	3.94858505	0.388658432
ndufb8	periderm	ENSDART00000105176	ENSDARG00000010113	505.774	496.725	480.164	494.221	474.053	410.881	458.423	447.7856667	0.032671645	0.082541331	1.083328532	0.144531491
ndufs4	non_periderm	ENSDART00000051055	ENSDARG00000052840	285.65	284.149	258.062	275.9536667	238.052	201.236	208.582	215.9566667	0.000427807	0.001921679	2.716319156	0.286356505
ndufs7	periderm	ENSDART00000111374	ENSDARG00000074552	282.452	276.111	256.155	271.5726667	212.756	193.442	189.053	198.417	1.16E-07	9.98E-07	6.000869459	0.377010987
necab1	periderm	ENSDART00000114117	ENSDARG00000056566	0.0102623	0.0983878	0.200597	0.103082367	0	0.244307	0.187726	0.144011	0.999740708	0.999894348	4.58865E-05	0.000382623
nedd9	non_periderm	ENSDART00000125673	ENSDARG00000089878	46.7867	47.7979	54.3507	49.6451	48.7521	52.3314	51.811	50.96483333	0.218065708	0.367160523	0.43514402	0.054331865
negr1	non_periderm	ENSDART00000028895	ENSDARG00000021607	9.53606	9.22508	11.1195	9.960213333	16.7598	17.3999	15.8895	16.68306667	5.05E-11	6.61E-10	9.179798541	-0.437156524
nek4	periderm	ENSDART00000058728	ENSDARG00000040152	6.31303	8.00199	6.9225	7.079173333	10.8511	9.3161	9.1467	9.7713	0.011751651	0.035038497	1.455454531	-0.24143657
nek6	periderm	ENSDART00000055328	ENSDARG00000037963	11.1545	8.85481	10.7567	10.25533667	9.97208	10.2527	9.98229	10.06902333	0.201209468	0.346076475	0.460827921	0.095400159
net1	periderm	ENSDART00000049066	ENSDARG00000032765	106.419	95.4006	96.0311	99.28356667	89.2251	92.8215	87.7561	89.93423333	0.002572118	0.009434366	2.02528728	0.180657197
neurod4	non_periderm	ENSDART00000145072	ENSDARG00000003469	15.4952	14.1935	17.7514	15.81336667	9.63359	11.7782	11.6739	11.02856333	1.95E-09	2.10E-08	7.677780705	0.438873386
neurog1	non_periderm	ENSDART00000078563	ENSDARG00000056130	13.7998	12.4386	11.8264	12.68826667	13.5882	15.2512	14.1957	14.34503333	0.552029122	0.693801345	0.158764863	-0.049942902
nf2a	periderm	ENSDART00000132564	ENSDARG00000020204	6.48269	6.25108	7.50881	6.747526667	6.44978	8.00614	6.3268	6.927573333	0.529762224	0.675688274	0.170253618	0.056057513
nfasca	non_periderm	ENSDART00000121874	ENSDARG00000061099	5.56051	7.39338	10.3278	7.760563333	7.8227	9.58088	6.76254	8.055373333	0.885144022	0.931961947	0.03060182	0.025149477
nfe2l3	non_periderm	ENSDART00000016135	ENSDARG00000019810	16.1054	16.3529	18.9651	17.14113333	28.0646	29.7629	26.5419	28.12313333	1.29E-16	2.81E-15	14.55129368	-0.413025839
nfil3-2	non_periderm	ENSDART00000063478	ENSDARG00000043237	1.75833	1.70246	2.53847	1.999753333	4.76988	4.21739	5.24239	4.74322	4.72E-10	5.51E-09	8.258848401	-0.795384098
nfil3-5	non_periderm	ENSDART00000146106	ENSDARG00000094965	2.46281	2.32193	3.14186	2.6422	4.30965	4.79837	4.26055	4.45619	2.13E-07	1.76E-06	5.754487332	-0.445127269
nfixb	periderm	ENSDART00000090235	ENSDARG00000061836	0.181108	0.125861	0.161319	0.156096	0.310572	0.119663	0.0778022	0.169345733	0.769474183	0.858313431	0.066354092	0.151023494
nfkb2	periderm	ENSDART00000134122	ENSDARG00000038687	9.74345	9.3907	10.4213	9.851816667	12.4188	14.0961	11.9378	12.81756667	0.004246055	0.014598426	1.835693967	-0.178130214
nfkbiaa	periderm	ENSDART00000130107	ENSDARG00000005481	11.2891	14.169	11.0566	12.17156667	4.54515	3.23361	2.63426	3.471006667	6.27E-13	9.90E-12	11.00436481	1.343604075
nfyc	non_periderm	ENSDART00000169067	ENSDARG00000070151	79.2452	73.9536	80.1372	77.77866667	110.579	110.395	113.834	111.6026667	3.87E-11	5.13E-10	9.289882635	-0.281680817
nicn1	non_periderm	ENSDART00000101580	ENSDARG00000069677	1.90235	0.996615	1.6568	1.518588333	3.71444	2.47714	2.52856	2.906713333	0.013062639	0.038346939	1.416269297	-0.591723539
nin	non_periderm	ENSDART00000129562	ENSDARG00000060298	6.89982	6.77907	7.15307	6.943986667	6.19405	6.28194	5.77746	6.084483333	0.000389909	0.001771327	2.751701257	0.218605569
nipal3	periderm	ENSDART00000139946	ENSDARG00000021147	6.74427	6.33329	7.23897	6.772176667	3.81044	4.92931	6.08812	4.942623333	0.002309171	0.008587533	2.066131581	0.412756462
nisch	periderm	ENSDART00000142886	ENSDARG00000043077	2.90614	3.11541	3.47039	3.16398	4.9807	6.07698	4.93807	5.331916667	2.20E-08	2.08E-07	6.681936665	-0.434675429
nit1	non_periderm	ENSDART00000102629	ENSDARG00000070116	3.41498	4.42484	3.52419	3.788003333	3.90161	3.92971	2.7921	3.54114	0.297773583	0.45814883	0.338993418	0.146366329
nkd1	non_periderm	ENSDART00000173523	ENSDARG00000020053	23.5069	24.833	27.3639	25.2346	32.602	33.6717	32.425	32.89956667	2.96E-05	0.000170163	3.769134866	-0.182022169
nkiras2	non_periderm	ENSDART00000074478	ENSDARG00000052594	9.29696	11.0458	10.0475	10.13008667	14.1165	15.4974	16.774	15.46263333	1.97E-06	1.39E-05	4.8569852	-0.341960644
nktr	periderm	ENSDART00000127988	ENSDARG00000059097	24.2649	28.9973	28.2452	27.16913333	28.1412	29.4414	26.0377	27.87343333	0.476242166	0.630152932	0.200554039	0.04711509
nkx2.2a	non_periderm	ENSDART00000140549	ENSDARG00000053298	5.12326	4.69599	2.18911	4.002786667	7.76912	8.56913	8.29412	8.21079	0.018487901	0.051477023	1.288386577	-0.704508572
nkx2.9	non_periderm	ENSDART00000005296	ENSDARG00000020332	7.62638	9.13341	9.21826	8.65935	19.2325	18.8684	16.2469	18.11593333	1.63E-12	2.48E-11	10.60554832	-0.668567197
nkx6.1	non_periderm	ENSDART00000029874	ENSDARG00000022569	17.8356	17.1175	15.7819	16.91166667	13.4022	14.3802	13.9885	13.92363333	7.73E-05	0.000407897	3.389449489	0.272574781
nkx6.2	non_periderm	ENSDART00000163847	ENSDARG00000104735	8.68713	8.02769	9.75878	8.824533333	9.56911	9.585	9.28182	9.478643333	0.941430427	0.966089974	0.014982425	0.005751106
nle1	periderm	ENSDART00000079703	ENSDARG00000057105	24.1091	27.2629	35.5307	28.96756667	36.997	37.2355	31.2102	35.14756667	0.214676292	0.363080695	0.439996842	-0.124481311
nlgn3a	non_periderm	ENSDART00000168749	ENSDARG00000104786	0.910312	1.17545	1.38474	1.156834	0.813351	0.778485	0.65361	0.748482	0.001564594	0.006077477	2.216276676	0.507925072
nlgn3b	periderm	ENSDART00000090171	ENSDARG00000062376	0.343388	0	0.120345	0.154577667	0.0392817	0	0.0911109	0.0434642	0.63398	0.759800639	0.119300346	0.828337185
nlrx1	periderm	ENSDART00000152706	ENSDARG00000073724	2.07928	2.6338	3.04003	2.58437	1.91563	2.17885	2.16073	2.08507	0.005390511	0.01790903	1.746927936	0.2879202
nme4	non_periderm	ENSDART00000139835	ENSDARG00000088390	1.03329	1.4774	0.698291	1.069660333	0.275286	0	0.19215	0.155812	0.025455987	0.067051673	1.173590382	2.093714525
nmnat2	periderm	ENSDART00000003550	ENSDARG00000004580	3.51744	3.06122	3.16121	3.246623333	0.647724	0.768157	0.710487	0.708789333	3.36E-17	7.74E-16	15.11125904	1.588609837
nmt1b	periderm	ENSDART00000079803	ENSDARG00000057206	9.97888	10.8816	10.0725	10.31099333	6.60076	7.06071	6.16235	6.60794	1.07E-07	9.20E-07	6.036212173	0.520870009
noc3l	non_periderm	ENSDART00000028043	ENSDARG00000002487	61.1425	62.4188	66.8528	63.47136667	77.8923	81.8953	81.5353	80.44096667	0.000219252	0.001050874	2.978449353	-0.155999238
nog1	non_periderm	ENSDART00000081766	ENSDARG00000058819	11.4263	9.27195	9.66145	10.1199	7.78659	7.71632	7.97564	7.826183333	0.000131342	0.000660365	3.180215953	0.332466835
nomo	non_periderm	ENSDART00000153552	ENSDARG00000078592	29.1209	31.0188	37.9588	32.6995	27.0851	34.0987	27.9072	29.697	0.017311296	0.048761361	1.311924181	0.179638046
nop10	periderm	ENSDART00000161015	ENSDARG00000104227	1023.95	927.794	878.803	943.5156667	780.798	770.28	774.004	775.0273333	0.001099843	0.004445307	2.352098241	0.22898277
nop16	non_periderm	ENSDART00000065208	ENSDARG00000044402	192.285	191.585	168.539	184.1363333	212.631	205.278	202.999	206.9693333	0.428735819	0.588821441	0.230016384	-0.059122123
nos1	periderm	ENSDART00000161706	ENSDARG00000068910	0.497027	1.14831	1.38106	1.008799	0.369532	0.366634	0.204415	0.313527	0.000560438	0.002444675	2.611778869	1.193275533
nosip	periderm	ENSDART00000165909	ENSDARG00000037958	20.0584	21.3151	18.2864	19.88663333	25.7761	28.0933	26.4489	26.77276667	0.010183889	0.030997322	1.508675825	-0.232352843
notch1b	non_periderm	ENSDART00000169616	ENSDARG00000052094	1.61286	2.1515	2.88149	2.215283333	2.06597	2.35723	2.43823	2.287143333	0.840546118	0.904181906	0.043744188	0.029335934
notch2	periderm	ENSDART00000123104	ENSDARG00000043130	5.56012	6.34308	8.55936	6.820853333	6.08281	5.88752	5.62796	5.866096667	0.030652149	0.078394416	1.105714871	0.221272033
notch3	non_periderm	ENSDART00000073930	ENSDARG00000052139	10.8734	14.7106	21.9007	15.82823333	22.7736	24.642	22.1396	23.18506667	0.054519729	0.125189025	0.902433743	-0.335747801
nova1	non_periderm	ENSDART00000097684	ENSDARG00000020178	4.28786	5.27577	7.01885	5.527493333	11.4854	10.5156	10.2404	10.74713333	5.31E-07	4.13E-06	5.384049948	-0.607253117
nova2	non_periderm	ENSDART00000166036	ENSDARG00000017673	17.6376	22.2914	18.0424	19.3238	36.8913	40.4319	39.4454	38.92286667	5.81E-13	9.20E-12	11.03621217	-0.625021126
nox1	periderm	ENSDART00000086104	ENSDARG00000087574	0.427941	0.500639	0.339854	0.422811333	0.175505	0.139598	0.208507	0.174536667	0.005604165	0.018506631	1.732672634	0.949792288
noxa1	periderm	ENSDART00000078469	ENSDARG00000056047	0.728216	0.535432	0.88058	0.714742667	0.139316	0.30578	0.20392	0.216338667	0.047382517	0.111806666	0.951532303	1.221220734
npas2	periderm	ENSDART00000014806	ENSDARG00000016536	0.653025	1.05746	0.990666	0.900383667	1.67778	2.0132	2.03837	1.909783333	9.17E-06	5.79E-05	4.237321436	-0.684658022
npc1	periderm	ENSDART00000103596	ENSDARG00000017180	17.2632	18.1952	23.2585	19.5723	22.7068	25.8775	23.3421	23.97546667	0.061187143	0.13746745	0.861800123	-0.124972995
npepps	periderm	ENSDART00000147670	ENSDARG00000044943	23.4589	24.6842	29.4002	25.84776667	35.1558	40.0848	37.8239	37.68816667	8.87E-11	1.13E-09	8.946921557	-0.295894714
npm1a	non_periderm	ENSDART00000133304	ENSDARG00000014329	2201.95	2213.09	2138.73	2184.59	2576.71	2521.28	2581.53	2559.84	0.067019089	0.148103244	0.829435429	-0.082335283
npm1b	periderm	ENSDART00000054876	ENSDARG00000037675	17.2212	17.7305	17.5117	17.4878	73.8772	79.599	78.8812	77.45246667	1.31E-208	9.93E-206	205.0030508	-1.404187714
nppa	non_periderm	ENSDART00000121432	ENSDARG00000052960	0.499135	0.608511	0.31087	0.472838667	0.296877	0.150282	0.302595	0.249918	0.128134757	0.246389576	0.60837767	0.699653934
nptx1l	periderm	ENSDART00000100327	ENSDARG00000074671	0.843461	0.909227	0.765945	0.839544333	0.660882	0.787499	0.516979	0.65512	0.088327371	0.184098932	0.734948731	0.338943351
nqo1	periderm	ENSDART00000004964	ENSDARG00000010250	24.5861	23.465	29.9022	25.98443333	10.5484	14.7057	11.628	12.29403333	4.84E-17	1.10E-15	14.95860731	0.827067678
nr1d4a	periderm	ENSDART00000103169	ENSDARG00000031161	0.113223	0.0878905	0.0636777	0.088263733	0.196988	0.195011	0.262633	0.218210667	0.245734594	0.400141764	0.397786118	-0.790814932
nr1d4b	periderm	ENSDART00000155844	ENSDARG00000059370	0.805877	1.06303	1.04819	0.972365667	0.713579	0.405857	0.712143	0.610526333	0.00946362	0.029111033	1.535942383	0.566132527
nr1i2	periderm	ENSDART00000125174	ENSDARG00000029766	0.918259	1.26699	1.59046	1.258569667	0.917358	0.775745	0.699857	0.797653333	0.007750922	0.024564016	1.609700628	0.515342456
nr2e1	non_periderm	ENSDART00000026635	ENSDARG00000017107	10.6312	8.82422	10.1557	9.870373333	26.7861	28.3238	29.4853	28.1984	3.79E-45	3.50E-43	42.45593196	-0.969890264
nr2f1a	non_periderm	ENSDART00000133384	ENSDARG00000052695	22.6714	22.7358	27.1507	24.18596667	29.2505	31.6832	30.5331	30.48893333	0.002505217	0.009219365	2.035298991	-0.152154479
nr3c1	periderm	ENSDART00000054264	ENSDARG00000025032	9.57109	9.2084	11.0197	9.933063333	9.438	9.61873	9.66258	9.573103333	0.058830209	0.133205836	0.875476747	0.11844459
nr3c2	periderm	ENSDART00000160056	ENSDARG00000102082	0.185538	0.345703	0.313055	0.281432	0.215262	0.0756871	0	0.096983033	0.082051071	0.173701269	0.760197009	1.736182558
nr6a1a	non_periderm	ENSDART00000168185	ENSDARG00000101508	7.83211	9.06253	8.65416	8.516266667	10.9863	8.58684	8.45911	9.344083333	0.919500868	0.953382936	0.020732626	-0.010227885
nrarpa	non_periderm	ENSDART00000122657	ENSDARG00000091419	293.303	297.585	330.5	307.1293333	322.072	333.736	306.853	320.887	0.306034336	0.467141416	0.330551627	0.038748746
nrarpb	non_periderm	ENSDART00000022625	ENSDARG00000018958	26.628	29.9491	35.428	30.66836667	34.2367	35.0839	30.21	33.17686667	0.996097746	0.998059561	0.000843541	-0.000331182
nrg1	periderm	ENSDART00000167963	ENSDARG00000104314	1.83458	1.76475	2.09899	1.89944	0.742771	0.582961	0.410655	0.578795667	0.000408969	0.001847312	2.733459749	1.28775609
nrg2a	periderm	ENSDART00000098696	ENSDARG00000077818	1.05422	1.65496	0.744008	1.151062667	1.25225	0.473692	0.495553	0.740498333	0.472350473	0.626773421	0.202889429	0.568988399
nrip1b	non_periderm	ENSDART00000149580	ENSDARG00000068894	10.0949	10.4863	12.452	11.01106667	10.3781	10.2115	8.06537	9.551656667	0.007706961	0.024446449	1.611784216	0.22955783
nrp1b	non_periderm	ENSDART00000098267	ENSDARG00000027290	4.73599	4.61879	6.15499	5.169923333	6.23893	7.65482	7.97905	7.290933333	0.005581264	0.018439557	1.734249517	-0.26198722
nrp2a	periderm	ENSDART00000150863	ENSDARG00000096546	12.9112	14.632	15.2398	14.261	9.13923	9.0885	8.49413	8.907286667	6.02E-21	1.87E-19	18.72815839	0.55376252
nrxn2b	non_periderm	ENSDART00000091955	ENSDARG00000063150	0.0754449	0.0806773	0.0916953	0.082605833	0.157018	0.033628	0.142499	0.111048333	0.963637578	0.978513892	0.009433004	-0.025178033
nsd1b	non_periderm	ENSDART00000137883	ENSDARG00000060705	2.17263	2.27066	2.07508	2.17279	1.56922	1.96723	1.28099	1.605813333	0.183808554	0.323454742	0.490186478	0.372497219
nsdhl	periderm	ENSDART00000172241	ENSDARG00000099315	4.31172	3.5207	3.96746	3.933293333	4.49927	3.83798	3.77915	4.0388	0.745800351	0.841473944	0.074959327	0.047660949
nsfl1c	non_periderm	ENSDART00000127586	ENSDARG00000087640	230.046	231.445	232.773	231.4213333	252.882	255.949	265.326	258.0523333	0.426601844	0.586795862	0.231512957	-0.030117451
nt5c1ba	periderm	ENSDART00000143325	ENSDARG00000018153	1.14946	0.826433	1.0395	1.005131	0.505711	0.686703	0.727563	0.639992333	0.016891028	0.047815841	1.320428201	0.529387367
nt5c2b	periderm	ENSDART00000065125	ENSDARG00000058231	7.95956	11.492	12.1907	10.54742	12.2814	11.2856	10.6517	11.40623333	0.903950045	0.943173918	0.025408217	-0.014585481
nt5dc2	non_periderm	ENSDART00000083108	ENSDARG00000059646	47.951	48.1749	51.4187	49.18153333	85.8408	98.3637	91.8938	92.03276667	5.48E-38	4.02E-36	35.39577395	-0.543441755
ntf3	periderm	ENSDART00000082046	ENSDARG00000059043	3.51903	2.94681	3.91891	3.461583333	0.676333	1.05679	0.676009	0.803044	4.90E-09	5.01E-08	7.300162274	1.524480209
ntn1b	non_periderm	ENSDART00000169706	ENSDARG00000022531	10.263	8.85111	10.0721	9.728736667	8.86554	8.65884	8.63441	8.719596667	0.001167067	0.004680886	2.329671936	0.19236573
nuak2	periderm	ENSDART00000135403	ENSDARG00000063661	128.76	129.095	134.709	130.8546667	84.6385	88.1559	89.0718	87.28873333	4.68E-35	3.02E-33	32.51999306	0.486388859
nubp1	periderm	ENSDART00000077817	ENSDARG00000055472	27.2236	26.3883	27.4947	27.03553333	32.2635	30.9859	29.794	31.01446667	0.360883474	0.524678505	0.280106728	-0.061546209
nucb1	periderm	ENSDART00000165920	ENSDARG00000054833	38.9088	43.9906	51.1787	44.6927	42.5637	40.7084	39.7823	41.01813333	0.009405792	0.028970684	1.538041251	0.156280777
nudcd1	periderm	ENSDART00000052503	ENSDARG00000036158	20.1823	19.9176	21.5251	20.54166667	18.9309	18.9542	20.3775	19.42086667	0.025095858	0.066284485	1.178588114	0.135937066
nudt1	periderm	ENSDART00000040753	ENSDARG00000030573	21.5299	22.5815	20.9046	21.672	35.0067	35.4996	33.9936	34.8333	4.00E-09	4.15E-08	7.381951903	-0.403066878
nudt14	non_periderm	ENSDART00000090016	ENSDARG00000062335	6.60339	5.68035	6.13716	6.1403	8.39116	10.0452	8.63869	9.025016667	0.00076934	0.003243485	2.488988106	-0.304891194
nudt18	periderm	ENSDART00000166066	ENSDARG00000041576	1.67702	1.52385	1.37201	1.524293333	2.69822	0.811392	2.65151	2.053707333	0.837374634	0.902205109	0.044694718	-0.097227766
numb	periderm	ENSDART00000103350	ENSDARG00000027279	1.5342	1.4597	1.5166	1.5035	1.67235	1.68202	1.33166	1.56201	0.619374321	0.748334464	0.125904253	0.052711084
numbl	non_periderm	ENSDART00000171169	ENSDARG00000101949	7.45847	7.72996	9.71161	8.300013333	9.49605	9.1455	7.96556	8.869036667	0.889060806	0.934593778	0.029377115	0.010782804
nup107	periderm	ENSDART00000040033	ENSDARG00000016010	87.2864	83.9096	92.6488	87.94826667	113.07	118.289	119.873	117.0773333	1.92E-07	1.60E-06	5.795880017	-0.204187398
nup88	non_periderm	ENSDART00000023123	ENSDARG00000003235	62.7098	62.8806	65.0562	63.54886667	80.3297	78.3835	81.1563	79.9565	0.000527923	0.002316745	2.635121766	-0.14882132
nus1	periderm	ENSDART00000034054	ENSDARG00000027813	20.0344	20.0467	22.6448	20.90863333	21.6257	23.8206	22.7239	22.7234	0.998280228	0.999374679	0.000271658	-0.00010567
nutf2	periderm	ENSDART00000079050	ENSDARG00000056531	261.644	267.89	263.25	264.2613333	335.534	333.323	325.52	331.459	7.54E-05	0.000398474	3.399600011	-0.156950146
nvl	periderm	ENSDART00000038315	ENSDARG00000025605	37.5353	39.5147	43.417	40.15566667	47.4317	51.6314	52.7119	50.59166667	0.001048759	0.004264492	2.370132696	-0.150120895
nxn	non_periderm	ENSDART00000028500	ENSDARG00000033978	67.8762	65.1881	63.78	65.61476667	75.9744	74.0572	75.5482	75.19326667	0.287065203	0.446690815	0.349992978	-0.055421123
oatx	periderm	ENSDART00000161239	ENSDARG00000019713	1.9356	2.16766	2.31249	2.138583333	2.79891	2.96896	2.99369	2.92052	0.015565163	0.044576324	1.350895749	-0.229009181
obsl1b	non_periderm	ENSDART00000112542	ENSDARG00000077388	0.699546	0.754283	0.324482	0.592770333	0.552386	0.499005	0.588378	0.546589667	0.729994445	0.830627358	0.080593769	0.104590084
oc90	non_periderm	ENSDART00000098303	ENSDARG00000001721	36.4208	41.2225	41.1551	39.59946667	34.9121	37.6437	35.3866	35.9808	9.75E-05	0.000503248	3.298217942	0.17769504
oca2	periderm	ENSDART00000087311	ENSDARG00000061303	0.396744	0.315692	0.368847	0.360427667	0.445405	0.581874	0.334953	0.454077333	0.486492331	0.63920325	0.194361026	-0.124146376
ociad1	periderm	ENSDART00000103365	ENSDARG00000052334	30.5114	30.3331	26.5006	29.11503333	31.3552	36.3515	36.7544	34.82036667	0.242676644	0.396503975	0.401752454	-0.102709206
oclna	periderm	ENSDART00000002622	ENSDARG00000005108	33.3216	33.0842	37.1272	34.511	27.6615	26.772	27.0481	27.16053333	3.05E-09	3.22E-08	7.492144128	0.318063029
oclnb	periderm	ENSDART00000134432	ENSDARG00000003091	6.58428	5.11839	6.14479	5.949153333	1.4735	1.45658	1.54543	1.491836667	6.80E-20	1.97E-18	17.70553377	1.45524427
odf3l2	periderm	ENSDART00000023521	ENSDARG00000021432	2.664	3.2266	2.61353	2.83471	1.41561	1.39153	1.31814	1.375093333	0.006609477	0.021374564	1.670102735	0.765485535
ogg1	periderm	ENSDART00000084081	ENSDARG00000060002	5.84738	5.9522	6.66403	6.154536667	14.2683	13.2014	14.3383	13.936	6.66E-15	1.26E-13	12.89962945	-0.742613262
olfcd3	non_periderm	ENSDART00000151432	ENSDARG00000068576	0.0524127	0.0546542	0.0950225	0.067363133	0.0762152	0.0832022	0	0.053139133	0.458527081	0.615030751	0.211103169	0.766761737
olfcg1	periderm	ENSDART00000161467	ENSDARG00000104552	0.0963929	0.0861648	0.108126	0.096894567	0.15947	0.0871255	0.0364452	0.0943469	0.731614033	0.831730112	0.080017575	0.243790201
olig2	non_periderm	ENSDART00000060006	ENSDARG00000040946	12.0737	11.4686	9.78322	11.10850667	12.2561	12.9717	11.4654	12.23106667	0.819279943	0.890957869	0.050142832	-0.022054935
olig4	non_periderm	ENSDART00000074499	ENSDARG00000052610	8.73085	7.70366	6.01151	7.482006667	8.58299	5.09586	6.72519	6.801346667	0.414235535	0.57455719	0.240666736	0.172882841
onecutl	non_periderm	ENSDART00000150028	ENSDARG00000040253	8.46499	9.46401	10.4478	9.458933333	6.86822	5.86704	5.73368	6.156313333	6.62E-12	9.49E-11	10.02273379	0.511940439
opa1	non_periderm	ENSDART00000104256	ENSDARG00000070801	3.08237	2.76868	3.04726	2.966103333	2.47196	3.63826	3.68952	3.26658	0.980479213	0.988874924	0.004858636	0.003144073
ophn1	periderm	ENSDART00000157881	ENSDARG00000035420	1.8278	2.83783	3.98795	2.884526667	3.89994	5.99936	3.02934	4.309546667	0.227691922	0.378780994	0.421611821	-0.327579469
optc	non_periderm	ENSDART00000003646	ENSDARG00000014358	58.8543	54.9752	50.5539	54.79446667	44.0682	36.9334	38.3182	39.77326667	4.60E-05	0.000253886	3.595361247	0.395425511
optn	periderm	ENSDART00000014036	ENSDARG00000002663	3.54279	2.97631	3.71108	3.41006	1.88027	2.82122	2.31352	2.338336667	0.000296098	0.001378924	2.860459669	0.466432217
pa2g4a	periderm	ENSDART00000057823	ENSDARG00000039578	371.555	363.067	385.33	373.3173333	493.668	509.605	507.417	503.5633333	7.01E-09	7.03E-08	7.153044675	-0.218378448
pank1a	periderm	ENSDART00000127583	ENSDARG00000008192	1.34862	1.33988	0.946863	1.211787667	1.34954	1.53822	0.937589	1.275116333	0.835335119	0.900939786	0.045304234	0.041850655
parla	non_periderm	ENSDART00000057439	ENSDARG00000039310	2.33665	2.33853	1.65717	2.110783333	1.0692	0.882686	0.645778	0.865888	8.33E-06	5.30E-05	4.27572413	0.967323208
parp12a	periderm	ENSDART00000130343	ENSDARG00000042496	0.253073	0.443066	0.181166	0.292435	0.0801217	0.254321	0.228145	0.187529233	0.222118068	0.372045936	0.429403435	0.550402067
pax2a	non_periderm	ENSDART00000133796	ENSDARG00000028148	6.84305	5.97174	5.63573	6.150173333	3.8888	5.31576	9.80316	6.335906667	0.808301404	0.883513989	0.05378657	0.110732489
pcca	non_periderm	ENSDART00000133905	ENSDARG00000028982	39.3015	38.7765	44.1462	40.7414	44.5638	46.1016	43.4553	44.7069	0.794795341	0.875089492	0.057947531	-0.011772106
pcdh18b	non_periderm	ENSDART00000074362	ENSDARG00000052494	5.23549	6.63144	7.14978	6.338903333	10.5905	12.7085	12.0623	11.7871	3.36E-11	4.48E-10	9.348721986	-0.541303917
pcdh19	non_periderm	ENSDART00000149443	ENSDARG00000034344	17.1049	19.1922	22.6035	19.63353333	15.6345	17.3494	16.5675	16.51713333	3.15E-06	2.15E-05	4.66756154	0.252830951
pcsk7	periderm	ENSDART00000154594	ENSDARG00000069968	14.5832	15.2674	17.7451	15.86523333	20.0853	22.2141	20.9296	21.07633333	0.00047067	0.00209257	2.679320005	-0.205089464
pdcb	periderm	ENSDART00000062539	ENSDARG00000017634	0.782383	0.666755	0.799382	0.749506667	0.973514	0.756171	0.946503	0.892062667	0.670420142	0.787968102	0.103491363	-0.08980831
pdgfra	non_periderm	ENSDART00000103510	ENSDARG00000070494	8.62078	9.27649	12.2045	10.03392333	7.57024	8.55431	6.28932	7.47129	0.000615034	0.002655258	2.575893274	0.376880807
pdia2	periderm	ENSDART00000005895	ENSDARG00000018263	0.5736	0.539029	0.505669	0.539432667	0.25163	0.341285	0.172436	0.255117	0.036595654	0.090736228	1.042219279	0.840618417
pex13	periderm	ENSDART00000021177	ENSDARG00000071037	8.57292	9.32463	10.0939	9.330483333	14.2595	14.3651	12.7751	13.7999	2.33E-06	1.63E-05	4.787812396	-0.309759498
pex2	non_periderm	ENSDART00000143862	ENSDARG00000062421	0.39414	0.672135	1.02481	0.697028333	0.654989	1.14132	0.483831	0.760046667	0.948253666	0.969599447	0.013407641	-0.022751742
pfdn2	non_periderm	ENSDART00000036703	ENSDARG00000025391	203.043	194.173	193.34	196.852	267.303	277.33	263.933	269.522	4.17E-08	3.79E-07	6.42136079	-0.236113048
pfn2	periderm	ENSDART00000104687	ENSDARG00000003952	136.378	127.08	130.175	131.211	129.938	148.105	141.956	139.9996667	0.714687739	0.820408668	0.08596976	0.018465981
pgap1	periderm	ENSDART00000090346	ENSDARG00000062465	1.49289	1.79383	2.06217	1.782963333	1.86971	1.72494	1.61794	1.73753	0.421697352	0.582238276	0.234899248	0.101396085
phc2a	periderm	ENSDART00000054362	ENSDARG00000056695	43.1945	38.718	30.554	37.48883333	34.8491	35.689	31.1571	33.8984	0.20894309	0.355916334	0.448652081	0.171742656
phox2a	non_periderm	ENSDART00000002384	ENSDARG00000007406	2.45163	2.48219	2.70721	2.54701	2.91097	2.72824	2.37875	2.672653333	0.698191796	0.808224517	0.09246798	0.038250451
pi4kb	non_periderm	ENSDART00000058666	ENSDARG00000040111	11.5885	13.2044	14.9106	13.2345	19.4846	21.1289	17.829	19.48083333	1.86E-06	1.32E-05	4.879426069	-0.305029829
pigo	periderm	ENSDART00000135044	ENSDARG00000011743	5.41913	6.56463	6.84517	6.27631	8.71243	8.02985	6.54866	7.763646667	0.205406128	0.351256808	0.45437525	-0.125805785
pisd	periderm	ENSDART00000022866	ENSDARG00000052462	8.66331	8.57575	8.55787	8.598976667	8.31594	8.90467	8.36938	8.529996667	0.245135807	0.399440693	0.398547693	0.089583712
pitpnb	non_periderm	ENSDART00000052268	ENSDARG00000036005	33.0496	34.9486	29.8021	32.6001	30.3397	29.6168	25.7852	28.58056667	0.015730163	0.044986706	1.346915805	0.212669792
plcd1a	periderm	ENSDART00000168751	ENSDARG00000059123	2.49006	2.61709	3.08219	2.72978	1.10106	1.75241	1.19276	1.348743333	9.56E-10	1.07E-08	7.970616222	0.805457032
plekha3	periderm	ENSDART00000079117	ENSDARG00000056601	5.08598	4.9303	4.585	4.867093333	5.68188	6.06689	5.44588	5.73155	0.40716227	0.567811532	0.245795791	-0.083888787
plekhg6	periderm	ENSDART00000138715	ENSDARG00000086056	0.419714	0.417442	0.771306	0.536154	0.0975841	0.194252	0.121803	0.1378797	3.61E-06	2.44E-05	4.612610174	1.414794833
plxna4	non_periderm	ENSDART00000157414	ENSDARG00000019328	0.670612	0.832684	0.887901	0.797065667	0.551522	0.75118	0.591844	0.631515333	0.175757909	0.313066353	0.504363606	0.320523155
plxnb1a	non_periderm	ENSDART00000166663	ENSDARG00000075821	3.40372	4.33222	5.66226	4.466066667	4.71269	5.82589	5.21028	5.24962	0.459512029	0.615864754	0.21051465	-0.09375363
polr1a	non_periderm	ENSDART00000160973	ENSDARG00000098375	20.9566	23.9767	29.551	24.8281	27.2895	32.0944	31.7235	30.36913333	0.133421028	0.254199893	0.594824637	-0.123698835
polr1c	periderm	ENSDART00000128246	ENSDARG00000039400	102.977	104.207	101.412	102.8653333	88.4411	93.0593	93.6386	91.713	6.99E-05	0.000371732	3.429770052	0.187611231
pomgnt1	periderm	ENSDART00000073755	ENSDARG00000052025	15.4447	14.5838	16.0038	15.3441	16.4811	16.5292	14.8646	15.9583	0.426569594	0.586795862	0.231512957	0.044517257
pou2f2a	non_periderm	ENSDART00000151704	ENSDARG00000036816	2.48232	2.35096	1.98624	2.273173333	0.878658	1.0542	2.16598	1.366279333	0.230084021	0.381771052	0.418197005	0.621661079
pou3f3b	non_periderm	ENSDART00000149202	ENSDARG00000095896	11.0574	11.8627	12.5069	11.809	19.26	21.2791	19.8757	20.13826667	1.08E-11	1.52E-10	9.818156412	-0.451169125
ppargc1b	non_periderm	ENSDART00000170871	ENSDARG00000101569	4.12334	4.13044	4.86469	4.372823333	4.21349	4.17699	3.58264	3.99104	0.00742584	0.023675645	1.625698181	0.176886684
ppfia4	non_periderm	ENSDART00000112567	ENSDARG00000053205	0.475406	0.847544	1.04405	0.789	0.546224	0.629125	0.377922	0.517757	0.061089434	0.137299901	0.862329776	0.47364572
ppil1	periderm	ENSDART00000154359	ENSDARG00000015422	156.161	152.365	132.293	146.9396667	152.734	136.816	136.646	142.0653333	0.329862714	0.491982701	0.308050168	0.087949562
ppl	periderm	ENSDART00000157729	ENSDARG00000101043	6.45977	7.4011	7.5249	7.12859	0.216679	0.657029	0.479682	0.45113	1.42E-20	4.32E-19	18.36451625	2.935361832
ppm1g	periderm	ENSDART00000159517	ENSDARG00000075559	130.076	125.347	137.62	131.0143333	161.976	177.821	169.162	169.653	5.02E-06	3.31E-05	4.480172006	-0.176105741
prdx6	periderm	ENSDART00000063877	ENSDARG00000043511	30.7223	31.1171	30.4224	30.75393333	20.698	21.5832	21.2467	21.17596667	4.13E-08	3.76E-07	6.424812155	0.437425046
prickle1a	periderm	ENSDART00000059514	ENSDARG00000040649	20.6867	21.9059	25.1444	22.579	17.9776	18.8323	17.5149	18.10826667	9.98E-11	1.27E-09	8.896196279	0.302711131
prkab1a	periderm	ENSDART00000064866	ENSDARG00000044183	6.1559	6.17069	5.90412	6.076903333	5.38671	6.2243	6.72668	6.112563333	0.458898664	0.61529741	0.210914913	0.075896574
prkx	non_periderm	ENSDART00000136761	ENSDARG00000060716	2.80722	2.50078	2.87153	2.72651	2.58855	2.59902	2.87975	2.689106667	0.271156008	0.429269071	0.367270401	0.097990465
prrg4	periderm	ENSDART00000151351	ENSDARG00000030753	11.4894	10.0598	11.2925	10.94723333	12.0778	9.88022	11.3703	11.10944	0.450571215	0.608368004	0.215833635	0.066180014
prtfdc1	periderm	ENSDART00000013454	ENSDARG00000011683	75.5882	73.6273	73.4109	74.2088	95.1947	92.5772	88.9905	92.25413333	0.002263655	0.008441452	2.073582845	-0.137084478
pspc1	non_periderm	ENSDART00000102335	ENSDARG00000006621	33.8621	35.0455	33.5466	34.1514	47.8009	56.9428	54.3957	53.04646667	1.77E-10	2.18E-09	8.661543506	-0.358268074
ptpn1	periderm	ENSDART00000062693	ENSDARG00000007923	32.2536	30.7802	33.0457	32.0265	27.2916	31.418	29.0575	29.2557	0.000399462	0.001810277	2.742254966	0.175066263
ptpn22	periderm	ENSDART00000158878	ENSDARG00000104197	1.88681	1.56676	1.76817	1.74058	1.5986	1.93021	1.63541	1.721406667	0.290260837	0.450325387	0.346473569	0.097525748
ptprga	periderm	ENSDART00000092552	ENSDARG00000045006	2.12016	2.0054	2.0343	2.053286667	1.18979	1.16565	1.22781	1.194416667	1.34E-11	1.86E-10	9.730487056	0.627112673
puf60a	non_periderm	ENSDART00000144613	ENSDARG00000032175	55.6188	63.5566	69.9963	63.05723333	75.1788	80.1038	78.3305	77.87103333	0.005178562	0.017301288	1.761921564	-0.135081146
pum1	periderm	ENSDART00000168263	ENSDARG00000099256	55.7519	61.2926	81.0905	66.045	102.051	113.127	98.2805	104.4861667	1.05E-05	6.55E-05	4.1837587	-0.38616026
rab18a	non_periderm	ENSDART00000077631	ENSDARG00000055291	9.32039	8.52079	10.5247	9.455293333	14.6875	16.2199	14.3199	15.07576667	5.28E-08	4.73E-07	6.325138859	-0.387993191
rab33ba	non_periderm	ENSDART00000074116	ENSDARG00000052290	3.88801	3.79176	3.95634	3.878703333	3.95421	4.49338	3.82042	4.089336667	0.580035502	0.716650789	0.144692417	0.035687119
rab40c	periderm	ENSDART00000087047	ENSDARG00000061208	28.0346	26.4826	30.5917	28.36963333	38.0259	39.0696	39.2395	38.77833333	5.90E-07	4.55E-06	5.341988603	-0.230908816
rab6bb	periderm	ENSDART00000042255	ENSDARG00000031343	1.9631	2.40508	1.49333	1.953836667	0.44533	0.430223	0.677089	0.517547333	2.05E-10	2.50E-09	8.602059991	1.40568654
rab9b	non_periderm	ENSDART00000162322	ENSDARG00000103391	1.67115	1.67273	1.36861	1.57083	2.43396	3.13106	4.63745	3.400823333	0.00728528	0.02326989	1.63320567	-0.67429626
rasgef1bb	periderm	ENSDART00000064968	ENSDARG00000044251	37.7969	42.0991	39.5483	39.81476667	48.5126	48.2039	47.9888	48.2351	0.020569728	0.056184684	1.250382057	-0.112883057
rbbp6	non_periderm	ENSDART00000102994	ENSDARG00000037919	48.7733	50.9662	60.1061	53.28186667	54.6878	59.8331	56.7547	57.09186667	0.726871678	0.828513906	0.081700198	0.013388758
rbfox1	non_periderm	ENSDART00000165936	ENSDARG00000014746	1.40636	1.52228	1.53792	1.488853333	0.687617	0.5731	0.619096	0.626604333	1.78E-08	1.69E-07	6.772113295	0.94653751
rbl1	periderm	ENSDART00000073865	ENSDARG00000008141	27.022	30.9037	30.699	29.54156667	42.9565	44.5818	41.1014	42.8799	4.52E-10	5.29E-09	8.276544328	-0.290573325
rbm24b	non_periderm	ENSDART00000154189	ENSDARG00000031809	21.886	27.1248	31.8826	26.96446667	16.1967	16.7041	15.4443	16.11503333	4.10E-10	4.83E-09	8.316052869	0.56487191
rbm38	periderm	ENSDART00000081763	ENSDARG00000058818	17.4618	16.1048	17.1384	16.90166667	28.172	28.8714	29.4037	28.8157	5.42E-15	1.03E-13	12.98716278	-0.452997738
recql	non_periderm	ENSDART00000021610	ENSDARG00000007175	7.55172	7.55416	7.68801	7.597963333	8.74866	8.41465	7.05232	8.071876667	0.748285028	0.843223784	0.074057152	0.026188882
rerea	non_periderm	ENSDART00000111345	ENSDARG00000077353	9.89632	11.2834	13.2262	11.46864	16.2483	17.5909	16.075	16.63806667	2.58E-07	2.11E-06	5.675717545	-0.292425277
rfx3	non_periderm	ENSDART00000171171	ENSDARG00000014550	3.63072	4.36612	5.53359	4.510143333	9.20736	9.84864	8.75651	9.270836667	9.98E-12	1.41E-10	9.850780887	-0.651756503
rgs4	non_periderm	ENSDART00000102483	ENSDARG00000070047	5.04619	4.72517	5.03981	4.937056667	5.15578	5.09387	6.34938	5.53301	0.757451296	0.849743349	0.070712226	-0.02758472
rgs5a	periderm	ENSDART00000127612	ENSDARG00000002644	0.764693	0.288823	0.3918	0.481772	0.560199	0.162343	0.629986	0.450842667	0.715334233	0.820698541	0.085816339	0.215381682
rnf144ab	non_periderm	ENSDART00000132278	ENSDARG00000042557	2.49834	1.58717	2.90393	2.329813333	3.44818	2.76371	2.35911	2.857	0.487055645	0.639654062	0.194054838	-0.141698984
rnf165a	non_periderm	ENSDART00000097796	ENSDARG00000077906	5.56348	8.06335	7.26456	6.963796667	7.19255	8.58482	7.66683	7.814733333	0.636643536	0.761576064	0.118286714	-0.060614825
robo1	non_periderm	ENSDART00000034683	ENSDARG00000026784	7.29526	9.72237	13.073	10.03021	11.0787	12.1919	11.6795	11.65003333	0.513068456	0.660941886	0.179836725	-0.091898977
robo2	non_periderm	ENSDART00000141086	ENSDARG00000078366	12.678	15.0844	19.4665	15.74296667	22.417	22.5144	24.9191	23.2835	0.004865157	0.01640351	1.785063212	-0.376680298
rock2b	periderm	ENSDART00000166573	ENSDARG00000004877	4.04747	3.92817	4.27861	4.08475	2.02705	2.53573	2.68689	2.416556667	1.60E-09	1.75E-08	7.756961951	0.615981072
ror1	non_periderm	ENSDART00000132280	ENSDARG00000015176	3.77508	4.59371	6.68631	5.018366667	5.18187	5.94572	5.72751	5.618366667	0.695118777	0.805891522	0.093723413	-0.055306974
ror2	non_periderm	ENSDART00000114491	ENSDARG00000076227	14.4344	15.9572	17.6428	16.01146667	19.299	22.1125	22.0072	21.13956667	0.000138497	0.000693498	3.158954787	-0.195132274
rpe65a	non_periderm	ENSDART00000004533	ENSDARG00000007480	0.266232	0.516486	0.542725	0.441814333	0.539969	1.0976	0.719148	0.785572333	0.121893678	0.237141637	0.624992187	-0.494206227
rpl37	periderm	ENSDART00000045284	ENSDARG00000034291	1188.17	1074.27	911.337	1057.925667	1004.87	934.555	961.248	966.891	0.31407383	0.475540566	0.32281243	0.107333749
rps26	non_periderm	ENSDART00000127198	ENSDARG00000037071	720.081	625.771	580.258	642.0366667	586.189	570.396	581.964	579.5163333	0.188285133	0.329422317	0.482246983	0.114303834
rps3a	periderm	ENSDART00000051763	ENSDARG00000035692	1138.39	1124.35	1061.97	1108.236667	1121.26	1061.14	1122.57	1101.656667	0.261020608	0.417827141	0.379003353	0.065261484
rrs1	non_periderm	ENSDART00000125190	ENSDARG00000003941	70.4723	68.3828	60.8442	66.56643333	77.2002	74.302	76.4026	75.96826667	0.491139494	0.643004561	0.191785947	-0.054251186
rsph9	non_periderm	ENSDART00000010903	ENSDARG00000017355	14.0237	14.1033	13.2265	13.7845	14.8488	11.6789	16.5694	14.3657	0.76266649	0.853195051	0.068951672	0.037575458
rtn1b	periderm	ENSDART00000027758	ENSDARG00000021143	3.94108	3.48489	3.70779	3.711253333	1.63923	1.50768	1.80213	1.64968	3.55E-08	3.25E-07	6.488116639	0.886769536
rtn2b	non_periderm	ENSDART00000079431	ENSDARG00000057027	6.20683	6.8859	6.30895	6.467226667	4.35009	3.42719	3.29752	3.6916	1.46E-08	1.40E-07	6.853871964	0.643385113
rxrgb	periderm	ENSDART00000002554	ENSDARG00000004697	7.14355	9.15878	7.96118	8.087836667	7.5907	10.1029	7.597	8.4302	0.70967412	0.816731032	0.087920943	0.040524201
ryr3	periderm	ENSDART00000147464	ENSDARG00000071331	0.0921636	0.0429694	0.0694422	0.068191733	0.172822	0.267382	0.255239	0.231814333	7.50E-06	4.82E-05	4.316952962	-1.156439316
s1pr1	non_periderm	ENSDART00000062633	ENSDARG00000042690	55.2143	57.2277	55.1256	55.85586667	71.3712	72.4307	73.7052	72.50236667	3.98E-05	0.000222412	3.652841785	-0.180228774
s1pr5a	non_periderm	ENSDART00000132987	ENSDARG00000040526	40.9508	42.0095	44.7513	42.57053333	44.0974	47.1521	44.5784	45.27596667	0.688057692	0.80086611	0.096440084	0.01910514
sall4	non_periderm	ENSDART00000065331	ENSDARG00000044485	120.163	142.177	180.549	147.6296667	146.084	165.836	136.273	149.3976667	0.539891732	0.683969817	0.164963063	0.061013723
sardh	periderm	ENSDART00000080904	ENSDARG00000058102	0.53493	0.428964	0.533876	0.499256667	0.491217	0.633803	0.662972	0.595997333	0.70697672	0.814943192	0.088872664	-0.090495133
scaf11	non_periderm	ENSDART00000067444	ENSDARG00000045885	23.2199	23.9396	28.8796	25.34636667	37.1899	42.0787	41.9013	40.38996667	2.48E-14	4.44E-13	12.35261703	-0.384216629
scel	periderm	ENSDART00000075926	ENSDARG00000034677	3.74519	3.26607	4.83535	3.94887	0.0682612	0.184281	0.196306	0.149616067	4.42E-08	4.00E-07	6.397940009	3.387567961
sec23b	periderm	ENSDART00000011865	ENSDARG00000019360	37.3834	40.1189	43.8904	40.46423333	42.0501	49.6133	48.3131	46.65883333	0.205585448	0.351495919	0.454079713	-0.059226506
sema3gb	non_periderm	ENSDART00000026316	ENSDARG00000013607	2.02981	2.25385	4.10057	2.794743333	3.95004	3.13733	3.57404	3.553803333	0.323188449	0.484707813	0.31451998	-0.203648161
sema6dl	non_periderm	ENSDART00000098788	ENSDARG00000011533	23.4112	30.2108	33.4585	29.02683333	31.712	32.9426	29.2351	31.29656667	0.984469788	0.991423847	0.003740639	-0.001678191
serinc1	periderm	ENSDART00000017553	ENSDARG00000009106	68.0005	70.4751	74.2121	70.8959	89.3614	101.019	94.3846	94.92166667	4.31E-07	3.40E-06	5.468521083	-0.210475592
serpina1	non_periderm	ENSDART00000153667	ENSDARG00000090286	0.490827	0.277297	0.529227	0.432450333	0	0.0610629	0.214477	0.091846633	0.016407908	0.046604481	1.331572324	2.018901932
setd7	periderm	ENSDART00000056734	ENSDARG00000038858	8.17876	7.54326	8.78472	8.168913333	7.7788	8.391	9.89063	8.68681	0.811308989	0.885310439	0.052904415	0.020572379
setmar	periderm	ENSDART00000112684	ENSDARG00000074836	0.39866	0.403892	0.407317	0.403289667	0.417445	0.634274	0.30878	0.453499667	0.98626657	0.992445542	0.003293315	-0.010072042
sgpl1	periderm	ENSDART00000111567	ENSDARG00000061375	8.29009	8.08255	8.9991	8.457246667	8.40354	9.54738	8.84871	8.93321	0.670273852	0.787968102	0.103491363	0.028908328
si:ch211-127b6.2	periderm	ENSDART00000169994	ENSDARG00000103324	0.306397	0.288926	0.373713	0.323012	0.379589	0.389938	0.389396	0.386307667	0.634905932	0.760494772	0.118903767	-0.099073335
si:ch211-137a8.2	non_periderm	ENSDART00000144126	ENSDARG00000068926	2.98211	3.42391	3.39357	3.26653	4.54333	4.66124	4.4797	4.561423333	0.009441596	0.02906711	1.536598146	-0.253021803
si:ch211-193k19.1	periderm	ENSDART00000051723	ENSDARG00000035660	0.460462	0.357782	0.523512	0.447252	0.78371	0.74212	0.204857	0.576895667	0.954414315	0.97338262	0.011716412	-0.025169576
si:ch211-245j22.3	non_periderm	ENSDART00000061681	ENSDARG00000041379	1.0473	1.53882	1.4062	1.330773333	1.02868	0.274157	0.247835	0.516890667	0.069828681	0.15286442	0.815693587	1.123998223
si:ch211-246m6.4	non_periderm	ENSDART00000140323	ENSDARG00000042857	4.31652	3.31972	4.30378	3.980006667	2.04582	2.6752	1.95104	2.22402	0.000614221	0.002652316	2.576374735	0.645622689
si:ch211-63o20.7	periderm	ENSDART00000061555	ENSDARG00000042000	8.38606	9.09785	8.82836	8.770756667	14.8897	16.345	14.6386	15.2911	1.66E-10	2.05E-09	8.688246139	-0.4754677
si:ch73-334d15.4	periderm	ENSDART00000159017	ENSDARG00000056502	1.60124	1.67618	1.68979	1.655736667	1.39315	1.54941	1.63193	1.52483	0.170385438	0.306009781	0.514264692	0.167516793
si:dkey-103i16.6	non_periderm	ENSDART00000099777	ENSDARG00000062893	0.0142614	3.42073	6.5423	3.3257638	4.12416	5.80089	5.65954	5.194863333	0.311932742	0.473407214	0.324765128	-1.723826929
si:dkey-220k22.3	non_periderm	ENSDART00000135037	ENSDARG00000094693	1.53129	1.12297	1.26464	1.3063	1.29788	1.39559	1.06893	1.254133333	0.705409159	0.813527642	0.089627686	0.105207204
si:dkey-22o22.2	non_periderm	ENSDART00000163380	ENSDARG00000102445	1.01334	1.0124	1.21765	1.08113	0.698639	0.5778	0.484625	0.587021333	1.08E-09	1.20E-08	7.920818754	0.703066941
si:dkey-240h12.4	periderm	ENSDART00000044426	ENSDARG00000034210	1.75073	2.34571	1.86552	1.98732	0.997124	0.887606	0.664364	0.849698	1.46E-06	1.06E-05	4.974694135	0.926993737
si:dkey-253d23.2	periderm	ENSDART00000155908	ENSDARG00000071589	8.02282	9.74577	7.46869	8.412426667	8.99152	11.2559	8.8357	9.694373333	0.603881722	0.735832338	0.13322113	-0.060353586
si:dkey-49n23.1	non_periderm	ENSDART00000059965	ENSDARG00000040920	7.11278	7.39019	9.34914	7.950703333	6.96487	6.56552	7.50439	7.011593333	0.017674998	0.049628798	1.304266243	0.203071633
si:dkey-90l23.2	non_periderm	ENSDART00000138713	ENSDARG00000086529	1.03613	1.62656	2.11313	1.59194	1.0616	2.28206	1.30535	1.54967	0.84328844	0.905874666	0.042931886	0.094851033
si:dkeyp-110e4.6	periderm	ENSDART00000088677	ENSDARG00000061845	18.2258	19.5274	22.5826	20.11193333	14.9705	17.4257	16.6321	16.34276667	1.40E-06	1.01E-05	4.995678626	0.288117043
si:dkeyp-28d2.4	periderm	ENSDART00000061301	ENSDARG00000103768	1.22087	0.975348	0.873719	1.023312333	1.33278	1.06032	1.352	1.248366667	0.451371306	0.609091963	0.215317131	-0.118016418
siah2l	non_periderm	ENSDART00000065169	ENSDARG00000044381	21.5533	21.6583	23.4841	22.2319	25.7738	28.8645	30.7359	28.45806667	0.005984302	0.01959182	1.707925218	-0.167315712
sid4	periderm	ENSDART00000100152	ENSDARG00000034273	0.631476	0.456977	0.390131	0.492861333	1.65771	1.4377	1.99879	1.698066667	8.05E-07	6.08E-06	5.216096421	-1.157364913
sin3b	non_periderm	ENSDART00000090371	ENSDARG00000062472	12.5362	13.5198	15.9722	14.0094	20.1608	21.5312	19.8288	20.50693333	1.60E-09	1.74E-08	7.759450752	-0.300780611
six3b	non_periderm	ENSDART00000077157	ENSDARG00000054879	99.8971	98.6716	93.8247	97.46446667	152.433	155.251	145.369	151.0176667	1.81E-12	2.74E-11	10.56224944	-0.360396289
six4b	non_periderm	ENSDART00000048110	ENSDARG00000031983	31.0512	34.1829	36.2708	33.83496667	27.0203	28.146	26.8214	27.32923333	2.48E-08	2.33E-07	6.632644079	0.29252097
slc14a2	non_periderm	ENSDART00000073626	ENSDARG00000051914	0.288242	3.25091	3.61493	2.384694	1.35648	1.47875	1.6939	1.50971	0.927879616	0.958391713	0.01845695	0.070700886
slc17a9a	periderm	ENSDART00000036801	ENSDARG00000042954	1.62999	1.73493	2.1651	1.84334	0.89989	1.3456	1.554	1.266496667	0.007286379	0.02326989	1.63320567	0.468272083
slc26a6	periderm	ENSDART00000113763	ENSDARG00000097292	0.448171	0.480104	0.50127	0.476515	0.433507	0.475399	0.687184	0.53203	0.971585567	0.983067356	0.007416725	-0.009584834
slc27a1b	non_periderm	ENSDART00000159070	ENSDARG00000104949	1.26493	1.82966	1.19047	1.428353333	1.18074	1.34855	0.864138	1.131142667	0.227348016	0.378390224	0.422060092	0.310918648
slc30a7	non_periderm	ENSDART00000009464	ENSDARG00000019998	110.915	112.167	110.848	111.31	77.1219	77.5042	78.7895	77.8052	1.07E-24	4.18E-23	22.37882372	0.436804086
slc36a1	periderm	ENSDART00000149087	ENSDARG00000075618	2.17576	2.35482	2.92889	2.48649	3.54811	3.76932	3.16216	3.493196667	0.003981475	0.013809993	1.859806542	-0.260651858
slc6a13	periderm	ENSDART00000001861	ENSDARG00000000730	3.95604	4.69902	4.48176	4.37894	4.71352	5.76072	5.49605	5.32343	0.210367357	0.357675348	0.446510992	-0.112004814
slc7a1	non_periderm	ENSDART00000146370	ENSDARG00000016439	1.33057	1.49455	1.59981	1.474976667	1.41472	1.40085	1.67956	1.498376667	0.720609854	0.824573081	0.083770847	0.064724401
slit3	non_periderm	ENSDART00000146299	ENSDARG00000034268	15.7154	16.3642	21.6917	17.92376667	7.74839	8.54205	7.85605	8.04883	1.08E-32	6.20E-31	30.20760831	0.87639836
smarcb1a	periderm	ENSDART00000049944	ENSDARG00000033647	133.182	137.793	131.223	134.066	151.493	146.773	152.746	150.3373333	0.399025512	0.560910103	0.251106737	-0.039439522
smurf2	periderm	ENSDART00000055491	ENSDARG00000038067	15.1238	17.0063	20.0855	17.4052	21.1977	21.9614	19.1779	20.779	0.117528372	0.230568938	0.637199201	-0.0990799
snap29	periderm	ENSDART00000056208	ENSDARG00000038518	6.15977	5.4558	4.0173	5.210956667	6.15346	4.273	2.5623	4.329586667	0.311039342	0.47255687	0.325545919	0.300754859
snapc1b	periderm	ENSDART00000003888	ENSDARG00000003827	14.2335	14.1292	12.6364	13.66636667	15.8551	14.9726	15.8179	15.54853333	0.499561302	0.649581945	0.187366055	-0.050918347
snrpd2	periderm	ENSDART00000059194	ENSDARG00000040440	1338.09	1287.62	1173.85	1266.52	1280.37	1160.66	1203.7	1214.91	0.228952813	0.380316727	0.419854573	0.09174132
snx10b	periderm	ENSDART00000059239	ENSDARG00000040474	0.147983	0.0921755	0.110746	0.116968167	0.0997331	0.06787	0.259891	0.142498033	0.975889877	0.985834616	0.006195936	0.020112268
socs3b	non_periderm	ENSDART00000037904	ENSDARG00000026611	167.144	168.21	172.527	169.2936667	134.419	135.37	138.439	136.076	2.14E-14	3.88E-13	12.41116827	0.298222767
sort1b	periderm	ENSDART00000134190	ENSDARG00000056252	2.31797	2.32487	2.82672	2.489853333	2.33517	2.13356	2.79979	2.42284	0.24634121	0.40076305	0.397112327	0.11381606
sox10	non_periderm	ENSDART00000112979	ENSDARG00000077467	9.69769	10.1577	12.7548	10.87006333	15.3423	16.9656	15.9451	16.08433333	2.01E-07	1.67E-06	5.777283529	-0.31527089
sparc	non_periderm	ENSDART00000039660	ENSDARG00000019353	182.893	183.363	172.082	179.446	153.948	148.737	148.71	150.465	3.86E-06	2.60E-05	4.585026652	0.253024086
spata6	non_periderm	ENSDART00000140867	ENSDARG00000021115	2.18709	4.02404	5.58296	3.931363333	3.27289	4.03051	3.0973	3.4669	0.774514674	0.861372742	0.064808876	0.092363756
spint1b	periderm	ENSDART00000008077	ENSDARG00000012467	8.71752	7.02183	8.02703	7.922126667	8.71629	7.84938	8.40233	8.322666667	0.757783943	0.850011159	0.070575373	0.02862189
spns2	periderm	ENSDART00000153909	ENSDARG00000061017	2.15484	2.35409	2.83419	2.447706667	1.14023	1.59044	0.860012	1.196894	1.83E-06	1.30E-05	4.886056648	0.823284031
spon1a	non_periderm	ENSDART00000016983	ENSDARG00000010029	0.157697	0.206336	0.065365	0.143132667	0.0964464	0.345236	0.0721894	0.1712906	0.946257607	0.968565264	0.01387111	0.038770911
spsb4a	non_periderm	ENSDART00000147821	ENSDARG00000016084	38.3608	38.1234	39.5971	38.69376667	42.2988	44.3948	41.2474	42.647	0.738470096	0.836586048	0.077489383	-0.016310931
srebf1	periderm	ENSDART00000092665	ENSDARG00000067607	1.88834	2.83903	2.76726	2.49821	4.96877	6.40043	5.61561	5.661603333	5.91E-09	5.99E-08	7.222573178	-0.745031582
srsf5a	non_periderm	ENSDART00000043312	ENSDARG00000029818	379.898	397.548	355.04	377.4953333	413.264	396.977	376.621	395.6206667	0.703500683	0.812015097	0.090435896	0.025151471
ssfa2	periderm	ENSDART00000147990	ENSDARG00000038938	8.31279	8.58135	7.27015	8.054763333	10.4072	5.23861	5.47029	7.0387	0.450542183	0.608368004	0.215833635	0.197590489
ssh1a	non_periderm	ENSDART00000153643	ENSDARG00000056780	1.745	2.30359	1.89148	1.980023333	2.89203	2.35378	1.43675	2.22752	0.997545717	0.99896252	0.000450806	-0.000689706
st8sia6	non_periderm	ENSDART00000122519	ENSDARG00000021195	13.8448	13.3174	16.339	14.5004	17.6994	21.4922	17.8611	19.01756667	0.002189383	0.008203462	2.086002829	-0.186420447
stambpb	periderm	ENSDART00000170360	ENSDARG00000086906	9.22098	8.12612	10.1666	9.171233333	6.15546	6.31352	6.60474	6.357906667	2.77E-06	1.91E-05	4.718966633	0.443040108
stat3	non_periderm	ENSDART00000104519	ENSDARG00000022712	41.3917	42.2155	45.0793	42.8955	49.9745	49.4571	46.029	48.48686667	0.383198154	0.546747315	0.262213341	-0.039900817
stau1	periderm	ENSDART00000064865	ENSDARG00000044182	27.0724	24.8264	29.5718	27.15686667	41.5769	38.4237	43.8759	41.29216667	1.07E-07	9.20E-07	6.036212173	-0.337359916
stoml1	periderm	ENSDART00000089516	ENSDARG00000062142	11.5846	12.6247	12.1465	12.1186	9.498	10.4256	12.9103	10.94463333	0.05335854	0.123054288	0.909903248	0.190190774
stx11b.1	periderm	ENSDART00000045397	ENSDARG00000029290	6.03138	5.54858	6.2628	5.947586667	0.602485	0.528149	0.0712455	0.4006265	2.00E-06	1.41E-05	4.850780887	3.056797419
stx12l	periderm	ENSDART00000065514	ENSDARG00000044605	1.06276	0.773244	0.832059	0.889354333	0.889909	0.829086	1.13586	0.951618333	0.919034791	0.953192747	0.020819271	0.015722544
stx1b	non_periderm	ENSDART00000081951	ENSDARG00000000503	1.06048	1.10069	1.4923	1.217823333	0.471126	0.701253	0.573097	0.581825333	7.79E-11	1.00E-09	9	0.823430308
sulf1	non_periderm	ENSDART00000027022	ENSDARG00000038428	36.4771	37.4623	40.4633	38.13423333	25.8443	34.993	28.5629	29.80006667	3.82E-06	2.57E-05	4.590066877	0.338333046
supt4h1	periderm	ENSDART00000168285	ENSDARG00000099366	856.381	798.605	740.169	798.385	875.565	823.426	759.123	819.3713333	0.931868872	0.960568319	0.017471741	-0.006457691
suv420h2	periderm	ENSDART00000124458	ENSDARG00000075461	7.29701	9.03693	6.51258	7.615506667	8.04957	7.97311	8.24964	8.090773333	0.956566367	0.97449064	0.011222328	0.006406301
tac1	non_periderm	ENSDART00000146947	ENSDARG00000014490	5.18294	5.93391	5.06343	5.393426667	0.871089	0.563495	1.42876	0.954448	1.08E-10	1.36E-09	8.866461092	1.836005275
tbx4	non_periderm	ENSDART00000018603	ENSDARG00000030058	0.31962	0.427618	0.483995	0.410411	0.313871	0.4243	0.730995	0.489722	0.964504424	0.979047731	0.009196135	-0.048598981
tceb3	non_periderm	ENSDART00000166031	ENSDARG00000102365	75.1636	90.9708	115.406	93.8468	92.2069	94.5151	80.3463	89.02276667	0.487650582	0.640083464	0.193763392	0.074217462
tcf7l2	non_periderm	ENSDART00000133854	ENSDARG00000004415	2.00254	0	2.19797	1.40017	2.55299	0	1.40095	1.31798	0.965698717	0.979767181	0.008877112	0.065929089
tdh	non_periderm	ENSDART00000147105	ENSDARG00000002745	177.569	185.329	187.551	183.483	136.599	142.631	138.965	139.3983333	3.00E-19	8.17E-18	17.08777794	0.354298645
tdrd1	periderm	ENSDART00000152981	ENSDARG00000007465	1.1944	0.870066	1.08597	1.050145333	0.911918	0.503056	0.683229	0.699401	0.015757462	0.045041762	1.346384629	0.508940818
terfa	periderm	ENSDART00000057423	ENSDARG00000039302	39.5148	45.6375	43.2566	42.80296667	53.0014	56.5879	53.873	54.48743333	0.001236022	0.004921974	2.307860685	-0.163437185
tex10	periderm	ENSDART00000078283	ENSDARG00000055885	59.0271	55.3257	60.9803	58.44436667	88.8376	96.1782	101.481	95.49893333	1.39E-18	3.61E-17	16.4424928	-0.407862182
tfeb	non_periderm	ENSDART00000006580	ENSDARG00000010794	0.458147	0.647126	0.702217	0.602496667	0.588659	0.648446	0.521118	0.586074333	0.499360171	0.649549897	0.187387482	0.100431317
thoc3	non_periderm	ENSDART00000079016	ENSDARG00000056517	89.0019	91.2849	82.0283	87.43836667	125.144	122.189	132.576	126.6363333	1.93E-05	0.000114636	3.940678976	-0.296030898
thrb	periderm	ENSDART00000017869	ENSDARG00000021163	1.82355	1.40231	1.50647	1.577443333	0.859449	0.627126	0.8716	0.786058333	0.005081963	0.017020915	1.769017097	0.774257921
thy1	non_periderm	ENSDART00000045410	ENSDARG00000035018	615.149	623.971	646.899	628.673	92.0189	91.6012	89.0658	90.8953	9.99E-300	9.99E-300	299.0004345	1.989859266
tln1	periderm	ENSDART00000160581	ENSDARG00000100729	28.6072	29.7053	27.8124	28.7083	16.1779	12.5259	10.0988	12.9342	8.75E-10	9.84E-09	8.007004902	0.882281403
tm9sf2	periderm	ENSDART00000019743	ENSDARG00000003866	90.4847	89.786	100.228	93.49956667	83.035	87.3302	83.899	84.75473333	5.62E-06	3.68E-05	4.434152181	0.179771127
tmem161a	non_periderm	ENSDART00000083879	ENSDARG00000012790	22.2118	23.9501	26.8949	24.35226667	14.515	19.7822	17.1274	17.14153333	1.46E-07	1.23E-06	5.910094889	0.431456042
tmem86b	periderm	ENSDART00000132732	ENSDARG00000038296	0.822195	0.710794	0.589968	0.707652333	0.603691	0.890044	0.565125	0.686286667	0.56570433	0.705005304	0.151807616	0.123323351
tmod4	periderm	ENSDART00000137153	ENSDARG00000020890	17.4813	18.0372	18.0196	17.84603333	12.5089	10.0491	12.1526	11.5702	2.04E-09	2.20E-08	7.657577319	0.514619044
tnfaip3	periderm	ENSDART00000033528	ENSDARG00000027777	6.67068	6.89991	8.83724	7.469276667	7.5225	7.1918	7.8218	7.512033333	0.376224367	0.53996301	0.26763599	0.068619386
tnfb	periderm	ENSDART00000017569	ENSDARG00000013598	12.238	11.6994	12.0966	12.01133333	0.585111	0.142319	0.538102	0.421844	1.65E-15	3.29E-14	13.4828041	3.538437407
tnfsf10l	periderm	ENSDART00000101447	ENSDARG00000004196	8.94903	9.38172	9.01886	9.116536667	5.99517	6.16087	6.63411	6.263383333	7.21E-15	1.36E-13	12.86646109	0.461496161
tomm20b	periderm	ENSDART00000158939	ENSDARG00000103566	182.115	181.186	160.605	174.6353333	160.206	146.41	160.389	155.6683333	0.027672524	0.071954414	1.142942559	0.178946254
top2a	non_periderm	ENSDART00000164246	ENSDARG00000024488	54.7413	61.8292	57.7194	58.09663333	30.2356	33.262	44.1681	35.88856667	2.77E-06	1.91E-05	4.718966633	0.57886571
top3b	non_periderm	ENSDART00000030553	ENSDARG00000027586	4.06833	4.44692	5.98045	4.8319	5.86979	6.53322	5.41723	5.94008	0.168535325	0.30353917	0.517785258	-0.13297389
tor2a	non_periderm	ENSDART00000165556	ENSDARG00000100559	3.72433	3.51855	4.86274	4.035206667	5.98747	4.564	4.56047	5.037313333	0.238961039	0.392142322	0.406556284	-0.145640813
tprg1	periderm	ENSDART00000078447	ENSDARG00000056026	1.59631	1.65504	1.4362	1.562516667	0.717776	0.286886	0.25469	0.419784	9.09E-06	5.74E-05	4.241088108	1.476668027
traf3ip1	periderm	ENSDART00000007189	ENSDARG00000010300	2.60259	4.10428	4.02007	3.575646667	3.41026	4.55831	3.6811	3.883223333	0.917288632	0.952312955	0.021220308	-0.015436323
traf4a	periderm	ENSDART00000016024	ENSDARG00000003963	31.0909	32.6538	33.5494	32.43136667	36.0281	39.5418	33.9322	36.5007	0.472653878	0.62701033	0.202725304	-0.034041193
trim46b	non_periderm	ENSDART00000081546	ENSDARG00000058649	0.696559	0.744199	0.992651	0.811136333	0.874009	0.987882	0.884374	0.915421667	0.747852765	0.843024895	0.0741596	-0.046616979
trim54	periderm	ENSDART00000061394	ENSDARG00000029907	0.44631	0.713927	0.930396	0.696877667	0.321535	0.733543	0.488742	0.514606667	0.272094311	0.430314531	0.366213988	0.381593888
trim66	non_periderm	ENSDART00000137799	ENSDARG00000054332	0.144567	0.242824	0.177439	0.188276667	0.4268	0.283638	0.0663416	0.258926533	0.991662612	0.995589019	0.001919902	-0.00595067
trmt11	periderm	ENSDART00000102552	ENSDARG00000040033	49.9398	47.8815	46.8288	48.2167	45.1738	53.6227	50.9256	49.90736667	0.488208385	0.640520171	0.193467189	0.043355819
tspan18b	non_periderm	ENSDART00000141835	ENSDARG00000015015	52.0418	51.1707	51.222	51.47816667	47.7316	43.9246	45.0816	45.57926667	6.24E-05	0.000336207	3.473393249	0.200375128
ttc13	periderm	ENSDART00000092217	ENSDARG00000063242	8.38088	8.05919	9.36343	8.601166667	6.30537	6.09688	5.14985	5.8507	2.54E-09	2.71E-08	7.567030709	0.469126263
ttyh2	non_periderm	ENSDART00000009172	ENSDARG00000016934	6.26554	5.13532	5.71969	5.70685	8.81924	10.3416	9.87632	9.679053333	2.91E-07	2.36E-06	5.627087997	-0.44924067
tyw1	periderm	ENSDART00000142870	ENSDARG00000062987	37.2822	39.7664	43.1697	40.07276667	30.7752	35.8294	33.7527	33.45243333	8.77E-08	7.65E-07	6.116338565	0.262261231
tyw5	periderm	ENSDART00000101571	ENSDARG00000069672	18.0234	18.3759	18.1283	18.17586667	13.0967	13.2402	15.8675	14.06813333	5.84E-06	3.82E-05	4.417936637	0.338156878
uba5	non_periderm	ENSDART00000093046	ENSDARG00000063588	13.4082	14.8385	12.5732	13.60663333	9.36702	8.65332	8.7799	8.933413333	5.51E-09	5.61E-08	7.251037139	0.496579808
ubfd1	periderm	ENSDART00000161582	ENSDARG00000102827	34.278	34.345	31.1601	33.26103333	33.9437	32.686	31.0877	32.57246667	0.150998364	0.279582172	0.553490526	0.097399138
uspl1	non_periderm	ENSDART00000043802	ENSDARG00000034825	16.9965	17.0094	16.9442	16.98336667	22.0462	25.7894	23.4407	23.75876667	1.62E-06	1.16E-05	4.935542011	-0.250069495
v2rh9	periderm	ENSDART00000022155	ENSDARG00000056009	0.292637	0.42176	0.43326	0.382552333	0.362872	0.290396	0.310245	0.321171	0.398218041	0.560263549	0.251607632	0.242947008
vamp3	periderm	ENSDART00000137516	ENSDARG00000070161	267.381	263.137	270.295	266.9376667	249.088	251.004	266.515	255.5356667	0.003484882	0.01231498	1.909566289	0.116060327
vegfc	non_periderm	ENSDART00000101489	ENSDARG00000069640	2.28353	2.35465	2.81038	2.482853333	3.00713	2.99547	2.86311	2.955236667	0.466387361	0.621993866	0.206213898	-0.099255834
vezf1b	non_periderm	ENSDART00000086592	ENSDARG00000061030	12.3945	14.5734	18.0221	14.99666667	26.3608	29.1666	22.7212	26.08286667	1.92E-06	1.36E-05	4.866461092	-0.48313149
vps72	periderm	ENSDART00000093383	ENSDARG00000063718	14.0461	15.0417	13.821	14.30293333	19.3561	21.2585	20.4645	20.3597	3.25E-06	2.22E-05	4.653647026	-0.270657077
wdr55	non_periderm	ENSDART00000003962	ENSDARG00000007217	22.4384	22.2235	21.7013	22.12106667	30.9392	32.4657	36.815	33.40663333	1.15E-06	8.41E-06	5.075204004	-0.331087005
wfdc2	periderm	ENSDART00000124091	ENSDARG00000089187	1.60335	1.30573	1.27813	1.395736667	1.63788	2.38889	1.70445	1.910406667	0.537577986	0.68228473	0.166034348	-0.254961461
wfs1b	periderm	ENSDART00000148789	ENSDARG00000074617	1.57616	1.58791	1.98138	1.71515	0.398687	0.668184	0.644827	0.570566	9.94E-14	1.68E-12	11.77469072	1.202268852
wisp1b	periderm	ENSDART00000109996	ENSDARG00000076685	0.130075	0.230653	0.271675	0.210801	0.0645687	0.152904	0.022913	0.080128567	0.182362784	0.321452406	0.492883319	1.112510487
wnt9a	periderm	ENSDART00000130349	ENSDARG00000063437	0.525005	0.574342	0.846485	0.648610667	0.768983	0.432137	0.253585	0.484901667	0.512590031	0.660589621	0.180068254	0.421450792
wrn	periderm	ENSDART00000162191	ENSDARG00000098211	1.28661	1.85885	1.99089	1.712116667	1.83939	1.787	1.46943	1.698606667	0.540139558	0.684121602	0.164866696	0.080988223
xkrx	periderm	ENSDART00000064614	ENSDARG00000044011	17.2751	17.9633	19.4114	18.2166	15.0792	15.1319	15.0664	15.0925	8.12E-06	5.19E-05	4.284832642	0.26843091
xpc	non_periderm	ENSDART00000058100	ENSDARG00000039754	10.5353	10.7488	11.2693	10.85113333	17.152	15.335	16.3103	16.26576667	1.48E-07	1.25E-06	5.903089987	-0.321384915
zc3h12b	non_periderm	ENSDART00000090375	ENSDARG00000062463	16.3532	18.2748	19.6323	18.08676667	27.6121	27.9521	26.1539	27.23936667	3.65E-10	4.32E-09	8.364516253	-0.328652596
zdhhc23b	periderm	ENSDART00000010126	ENSDARG00000003899	8.07961	8.06311	9.10642	8.41638	12.0172	9.70054	11.8439	11.18721333	0.01787069	0.050103213	1.300134423	-0.204392944
zfand5b	periderm	ENSDART00000024450	ENSDARG00000002271	68.1112	70.8657	72.119	70.3653	77.6475	77.2916	76.4869	77.142	0.758200531	0.850192967	0.070482492	-0.013924477
zfpm2b	non_periderm	ENSDART00000168296	ENSDARG00000100560	0.515662	0.946125	0.949557	0.803781333	0.64266	0.446989	0.577361	0.55567	0.053159844	0.122706271	0.911133242	0.424680943
zgc:103559	non_periderm	ENSDART00000055848	ENSDARG00000038293	0.157873	0	0.33289	0.163587667	0.228488	0	0.0243127	0.0842669	0.622253024	0.750226198	0.124807774	0.668308272
zgc:109913	non_periderm	ENSDART00000029871	ENSDARG00000022512	0.352505	0.198956	0.270324	0.273928333	0.445768	0.132203	0.178153	0.252041333	0.61967317	0.748509287	0.125802807	0.259771845
zgc:110699	non_periderm	ENSDART00000052322	ENSDARG00000017474	0.297359	0.213908	0.291783	0.267683333	0.206625	0.349324	0.244924	0.266957667	0.791528254	0.873290314	0.058841357	0.096075741
zgc:110712	periderm	ENSDART00000142208	ENSDARG00000019365	101.88	107.478	103.224	104.194	7.79647	7.31176	7.49929	7.53584	9.99E-300	9.99E-300	299.0004345	2.702952339
zgc:112994	non_periderm	ENSDART00000148188	ENSDARG00000026296	5.07171	5.12888	4.70099	4.967193333	1.34343	1.34503	2.24948	1.64598	8.68E-10	9.79E-09	8.009217308	1.194262016
zgc:113054	non_periderm	ENSDART00000075521	ENSDARG00000053483	14.4104	15.3712	15.634	15.13853333	19.8513	23.9647	21.4559	21.7573	5.42E-06	3.56E-05	4.448550002	-0.279622411
zgc:113229	periderm	ENSDART00000123225	ENSDARG00000037398	0.116038	0.608272	0.406047	0.376785667	0.381463	0.215224	0.0912466	0.2293112	0.404466595	0.565609108	0.247483606	0.523310216
zgc:113425	periderm	ENSDART00000132966	ENSDARG00000026616	1.15982	1.99577	1.3037	1.48643	1.37476	1.39374	1.1059	1.291466667	0.551321182	0.693381369	0.159027832	0.182901372
zgc:136254	non_periderm	ENSDART00000099031	ENSDARG00000068465	0.832994	1.06184	1.03082	0.975218	0	0	0.0980964	0.0326988	0.000481552	0.002135087	2.670584424	3.225320705
zgc:153311	non_periderm	ENSDART00000025698	ENSDARG00000015964	0.825727	0.177829	0.282446	0.428667333	0.206783	0.0966977	0	0.101160233	0.104835427	0.210923785	0.675874444	1.553519463
zgc:162183	periderm	ENSDART00000169735	ENSDARG00000074663	10.814	10.195	13.2222	11.4104	8.511	7.34186	6.59514	7.482666667	2.16E-07	1.79E-06	5.747146969	0.499736947
zgc:171500	periderm	ENSDART00000105864	ENSDARG00000071553	0.107935	0.4021	0.138744	0.216259667	0.19665	0.106087	0.228691	0.177142667	0.812165564	0.885791868	0.052668311	0.15128191
zgc:171775	non_periderm	ENSDART00000048073	ENSDARG00000058381	43.7972	45.0554	50.1334	46.32866667	34.412	35.8286	35.2343	35.1583	4.84E-17	1.10E-15	14.95860731	0.358324679
zgc:171779	periderm	ENSDART00000076189	ENSDARG00000016908	3.33487	4.98711	5.0598	4.460593333	3.61966	5.70681	3.00419	4.11022	0.413279195	0.573632876	0.241365966	0.174231979
zgc:171901	periderm	ENSDART00000161685	ENSDARG00000074365	0.781305	0.582654	0.650421	0.67146	3.22E-09	0.343498	5.13E-07	0.114499505	0.008862248	0.027542724	1.55999311	3.167102718
zgc:172090	periderm	ENSDART00000111174	ENSDARG00000075626	0.511163	0.452283	0.565337	0.509594333	0.624117	0.396258	0.613437	0.544604	0.889319072	0.934613634	0.029367888	0.032271912
zgc:173556	periderm	ENSDART00000065821	ENSDARG00000090768	6.42309	5.58851	4.87292	5.628173333	1.96735	2.82641	3.20648	2.666746667	3.15E-06	2.15E-05	4.66756154	0.831559323
zgc:174180	non_periderm	ENSDART00000171203	ENSDARG00000101389	0.289756	0.232715	0.17249	0.231653667	0.150222	0.0420655	0.17859	0.123625833	0.251714925	0.407108316	0.390290026	0.829788952
zgc:174704	periderm	ENSDART00000125943	ENSDARG00000088375	5.66625	5.21623	4.20729	5.029923333	2.3386	2.15077	2.98761	2.492326667	1.05E-06	7.75E-06	5.110698297	0.778372596
zgc:174935	periderm	ENSDART00000149275	ENSDARG00000079255	3.63687	3.37557	3.31122	3.44122	1.42477	1.80748	0.919113	1.383787667	1.77E-07	1.48E-06	5.829738285	1.019332065
zgc:194242	non_periderm	ENSDART00000114263	ENSDARG00000079532	1.28146	1.15895	1.4135	1.284636667	1.17692	0.792167	0.903269	0.957452	0.04031824	0.098208836	1.007849436	0.381981532
zgc:194679	periderm	ENSDART00000112242	ENSDARG00000073723	0.6955	1.08582	0.790424	0.857248	0.130669	0.292618	0.096111	0.173132667	2.00E-07	1.66E-06	5.779891912	1.754804977
zgc:198241	periderm	ENSDART00000155075	ENSDARG00000076483	0.338158	0.179496	0.57712	0.364924667	0.503223	0.587213	0.371212	0.487216	0.383270785	0.546771165	0.262194397	-0.292815157
zgc:64106	periderm	ENSDART00000143537	ENSDARG00000011371	2.94935	2.32038	3.60166	2.95713	2.6819	2.13049	2.39145	2.40128	0.045870512	0.108931761	0.962845475	0.274067622
zgc:77614	periderm	ENSDART00000144155	ENSDARG00000091883	5.50148	3.9785	2.39096	3.95698	0	0	0	0	4.23E-11	5.58E-10	9.253365801	4.896678588
zgc:91910	non_periderm	ENSDART00000051749	ENSDARG00000035678	286.979	283.458	285.541	285.326	234.839	206.285	219.482	220.202	3.63E-09	3.79E-08	7.42136079	0.321355673
zic4	non_periderm	ENSDART00000114537	ENSDARG00000031307	2.06627	1.44742	0.709654	1.407781333	7.5089	5.97894	9.06452	7.517453333	5.54E-06	3.63E-05	4.440093375	-1.666356588
znf185	periderm	ENSDART00000167119	ENSDARG00000103917	3.81113	4.39139	4.55162	4.25138	0.259133	0.748986	0.786689	0.598269333	9.52E-10	1.07E-08	7.970616222	2.146796536
znf503	non_periderm	ENSDART00000008906	ENSDARG00000018492	59.5248	60.2438	68.1639	62.64416667	81.5482	83.7448	88.6292	84.64073333	2.00E-07	1.66E-06	5.779891912	-0.221067132
znf516	non_periderm	ENSDART00000104279	ENSDARG00000070809	2.55547	3.48558	4.72777	3.589606667	4.80444	6.79712	5.82182	5.807793333	0.015067439	0.043349623	1.363014675	-0.418024151
znf532	non_periderm	ENSDART00000144460	ENSDARG00000052894	1.00301	0	3.04263	1.348546667	0.978268	2.56437	2.76541	2.102682667	0.31958743	0.481374934	0.317516528	-1.01332343
zranb3	non_periderm	ENSDART00000123574	ENSDARG00000091538	3.88281	4.62571	4.45133	4.31995	5.97188	7.56281	6.62565	6.720113333	3.86E-06	2.60E-05	4.585026652	-0.356080893
