# Supplementary material for: Analysis of zebrafish periderm enhancers facilitates identification of a regulatory variant near human KRT8/18
Source: eLife. 2020 Feb 7;9:e51325. doi: 10.7554/eLife.51325 (PMC7039683; doi:10.7554/eLife.51325)
Supplement: Figure 3—source data 2. [file elife-51325-fig3-data2.xlsx]

## Sheet: Sheet1
# Term Name	‘-LOG(binomial P-value)
Gastrula:75%-epiboly 8-9h; blastoderm	25.0959
Gastrula:Germ-ring 5.66-6h; blastoderm	22.2516
Gastrula:90%-epiboly 9-10h; ectoderm	20.769
Gastrula:75%-epiboly 8-9h; EVL	19.1512
Gastrula:90%-epiboly 9-10h; EVL	18.9405
Gastrula:Bud 10-10.33h; EVL	18.2306
Gastrula:Germ-ring 5.66-6h; EVL	18.1327
Gastrula:90%-epiboly 9-10h; blastoderm	18.1162
Gastrula:50%-epiboly 5.25-5.66h; EVL	18.0624
Gastrula:Shield 6-8h; ectoderm	17.5713
