# Supplementary material for: Analysis of zebrafish periderm enhancers facilitates identification of a regulatory variant near human KRT8/18
Source: eLife. 2020 Feb 7;9:e51325. doi: 10.7554/eLife.51325 (PMC7039683; doi:10.7554/eLife.51325)
Supplement: Figure 4—source data 1. [file elife-51325-fig4-data1.csv]

EID	GROUP	ANATOMY	GR	Epigenome.Mnemonic	Standardized.Epigenome.name..from.Wouter.	Epigenome.name..from.EDACC.Release.9.directory.	TYPE	top30K_hit	top30K_bkg	hit_ratio	element_total	element_bkg	element_ratio	enrichment	Epithelial	binom	labeling
E005	ES-deriv	ESC_DERIVED	ES-deriv	ESDR.H1.BMP4.TROP	H1 BMP4 Derived Trophoblast Cultured Cells	H1_BMP4_Derived_Trophoblast_Cultured_Cells	ESCDerived	9013	29999	0.300443348	1925960	30956607	0.062214829	4.829127632	No	8047.303328	E005
E028	Epithelial	BREAST	Epithelial	BRST.HMEC.35	Breast variant Human Mammary Epithelial Cells (vHMEC)	Breast_vHMEC	PrimaryCulture	10406	29999	0.346878229	2653708	30956607	0.085723477	4.046478746	Yes	7960.840357	E028
E057	Epithelial	SKIN	Epithelial	SKIN.PEN.FRSK.KER.02	Foreskin Keratinocyte Primary Cells skin02	Penis_Foreskin_Keratinocyte_Primary_Cells_skin02	PrimaryCulture	9690	29999	0.323010767	2323510	30956607	0.075056998	4.303539633	Yes	7809.299477	E057
E119	ENCODE2012	BREAST	ENCODE2012	BRST.HMEC	HMEC Mammary Epithelial Primary Cells	HMEC_Mammary_Epithelial	PrimaryCulture	9581	29999	0.319377313	2409660	30956607	0.077839926	4.103001233	Yes	7329.821686	E119
E099	Other	PLACENTA	Other	PLCNT.AMN	Placenta Amnion	Placenta_Amnion	PrimaryTissue	8888	29999	0.296276543	2098290	30956607	0.067781653	4.371043322	No	7179.080041	E099
E058	Epithelial	SKIN	Epithelial	SKIN.PEN.FRSK.KER.03	Foreskin Keratinocyte Primary Cells skin03	Penis_Foreskin_Keratinocyte_Primary_Cells_skin03	PrimaryCulture	8910	29999	0.2970099	2201064	30956607	0.071101591	4.177260979	Yes	6866.934673	E058
E127	ENCODE2012	SKIN	ENCODE2012	SKIN.NHEK	NHEK-Epidermal Keratinocyte Primary Cells	NHEK-Epidermal_Keratinocytes	PrimaryCulture	9149	29999	0.304976833	2383580	30956607	0.076997456	3.960868924	Yes	6683.691628	E127
E006	ES-deriv	ESC_DERIVED	ES-deriv	ESDR.H1.MSC	H1 Derived Mesenchymal Stem Cells	H1_Derived_Mesenchymal_Stem_Cells	ESCDerived	8004	29999	0.266808894	2271860	30956607	0.073388534	3.63556648	No	5186.895689	E027
E117	ENCODE2012	CERVIX	ENCODE2012	CRVX.HELAS3.CNCR	HeLa-S3 Cervical Carcinoma Cell Line	HeLa-S3_Cervical_Carcinoma	CellLine	8144	29999	0.271475716	2362558	30956607	0.076318377	3.557147399	No	5152.457121
E091	Other	PLACENTA	Other	PLCNT.FET	Placenta	Fetal_Placenta	PrimaryTissue	7583	29999	0.252775093	2119014	30956607	0.068451106	3.692783152	No	4969.188024	E091
E027	Epithelial	BREAST	Epithelial	BRST.MYO	Breast Myoepithelial Primary Cells	Breast_Myoepithelial_Cells	PrimaryCell	7941	29999	0.264708824	2346358	30956607	0.075795064	3.492428275	Yes	4892.305633	E027
E079	Digestive	GI_ESOPHAGUS	Digestive	GI.ESO	Esophagus	Esophagus	PrimaryTissue	6399	29999	0.21330711	1575138	30956607	0.050882127	4.192181499	Digestive	4746.760363
E096	Other	LUNG	Other	LNG	Lung	Lung	PrimaryTissue	6700	29999	0.223340778	1898566	30956607	0.061329913	3.641628836	No	4250.201165
E114	ENCODE2012	LUNG	ENCODE2012	LNG.A549.ETOH002.CNCR	A549 EtOH 0.02pct Lung Carcinoma Cell Line	A549_EtOH_0.02pct_Lung_Carcinoma	CellLine	7608	29999	0.253608454	2443404	30956607	0.078929968	3.213081926	No	4177.023212
E056	Epithelial	SKIN	Epithelial	SKIN.PEN.FRSK.FIB.02	Foreskin Fibroblast Primary Cells skin02	Penis_Foreskin_Fibroblast_Primary_Cells_skin02	PrimaryCulture	7442	29999	0.248074936	2422488	30956607	0.078254313	3.170112007	No	3998.224715
E013	ES-deriv	ESC_DERIVED	ES-deriv	ESDR.CD56.MESO	hESC Derived CD56+ Mesoderm Cultured Cells	hESC_Derived_CD56+_Mesoderm_Cultured_Cells	ESCDerived	7487	29999	0.249574986	2451590	30956607	0.079194403	3.151422038	No	3993.054778
E118	ENCODE2012	LIVER	ENCODE2012	LIV.HEPG2.CNCR	HepG2 Hepatocellular Carcinoma Cell Line	HepG2_Hepatocellular_Carcinoma	CellLine	6622	29999	0.220740691	1996810	30956607	0.064503516	3.422149744	No	3880.272638
E055	Epithelial	SKIN	Epithelial	SKIN.PEN.FRSK.FIB.01	Foreskin Fibroblast Primary Cells skin01	Penis_Foreskin_Fibroblast_Primary_Cells_skin01	PrimaryCulture	7250	29999	0.241674722	2403022	30956607	0.077625497	3.113342036	No	3783.887212
E123	ENCODE2012	BLOOD	ENCODE2012	BLD.K562.CNCR	K562 Leukemia Cells	K562_Leukemia	PrimaryCulture	6529	29999	0.217640588	1983646	30956607	0.064078276	3.396480093	No	3782.218106
E075	Digestive	GI_COLON	Digestive	GI.CLN.MUC	Colonic Mucosa	Colonic_Mucosa	PrimaryTissue	6333	29999	0.211107037	1885700	30956607	0.060914299	3.465640121	Digestive	3752.028067
E110	Digestive	GI_STOMACH	Digestive	GI.STMC.MUC	Stomach Mucosa	Stomach_Mucosa	PrimaryTissue	7004	29999	0.233474449	2280650	30956607	0.07367248	3.169086342	Digestive	3729.60081
E122	ENCODE2012	VASCULAR	ENCODE2012	VAS.HUVEC	HUVEC Umbilical Vein Endothelial Primary Cells	HUVEC_Umbilical_Vein_Endothelial_Cells	PrimaryCulture	6915	29999	0.230507684	2235786	30956607	0.072223225	3.191600525	No	3712.124452
E109	Digestive	GI_INTESTINE	Digestive	GI.S.INT	Small Intestine	Small_Intestine	PrimaryTissue	6504	29999	0.216807227	2000574	30956607	0.064625106	3.354845218	Digestive	3705.692214
E017	IMR90	LUNG	Other	LNG.IMR90	IMR90 fetal lung fibroblasts Cell Line	IMR90_Cell_Line	CellLine	6830	29999	0.227674256	2191224	30956607	0.070783726	3.216477394	No	3699.841606
E120	ENCODE2012	MUSCLE	ENCODE2012	MUS.HSMM	HSMM Skeletal Muscle Myoblasts Cells	HSMM_Skeletal_Muscle_Myoblasts	PrimaryCulture	7269	29999	0.242308077	2455970	30956607	0.079335891	3.054205023	No	3692.982772
E126	ENCODE2012	SKIN	ENCODE2012	SKIN.NHDFAD	NHDF-Ad Adult Dermal Fibroblast Primary Cells	NHDF-Ad_Adult_Dermal_Fibroblasts	PrimaryCulture	7579	29999	0.252641755	2663196	30956607	0.086029971	2.936671395	No	3657.825288
E098	Other	PANCREAS	Other	PANC	Pancreas	Pancreas	PrimaryTissue	5377	29999	0.179239308	1410888	30956607	0.045576313	3.93272947	No	3653.15099
E106	Digestive	GI_COLON	Digestive	GI.CLN.SIG	Sigmoid Colon	Sigmoid_Colon	PrimaryTissue	6342	29999	0.211407047	1935362	30956607	0.062518544	3.381509437	Digestive	3640.377108
E121	ENCODE2012	MUSCLE	ENCODE2012	MUS.HSMMT	HSMM cell derived Skeletal Muscle Myotubes Cells	HSMMtube_Skeletal_Muscle_Myotubes_Derived_from_HSMM	PrimaryCulture	7933	29999	0.264442148	2905426	30956607	0.093854795	2.817566736	No	3620.52668
E125	ENCODE2012	BRAIN	ENCODE2012	BRN.NHA	NH-A Astrocytes Primary Cells	NH-A_Astrocytes	PrimaryCulture	7564	29999	0.252141738	2687784	30956607	0.086824244	2.904047607	No	3588.657512
E001	ESC	ESC	ESC	ESC.I3	ES-I3 Cells	ES-I3_Cell_Line	PrimaryCulture	7712	29999	0.257075236	2787422	30956607	0.090042878	2.855031296	No	3575.90847
E077	Digestive	GI_DUODENUM	Digestive	GI.DUO.MUC	Duodenum Mucosa	Duodenum_Mucosa	PrimaryTissue	6679	29999	0.222640755	2162340	30956607	0.069850678	3.187381423	Digestive	3562.891178
E084	Digestive	GI_INTESTINE	Digestive	GI.L.INT.FET	Fetal Intestine Large	Fetal_Intestine_Large	PrimaryTissue	6594	29999	0.219807327	2121176	30956607	0.068520946	3.207885171	Digestive	3543.103013
E102	Digestive	GI_RECTUM	Digestive	GI.RECT.MUC.31	Rectal Mucosa Donor 31	Rectal_Mucosa.Donor_31	PrimaryTissue	6511	29999	0.217040568	2089328	30956607	0.067492151	3.21578975	Digestive	3504.885834
E094	Digestive	GI_STOMACH	Digestive	GI.STMC.GAST	Gastric	Gastric	PrimaryTissue	5220	29999	0.1740058	1386054	30956607	0.044774093	3.88630542	Digestive	3489.160941
E004	ES-deriv	ESC_DERIVED	ES-deriv	ESDR.H1.BMP4.MESO	H1 BMP4 Derived Mesendoderm Cultured Cells	H1_BMP4_Derived_Mesendoderm_Cultured_Cells	ESCDerived	6712	29999	0.223740791	2224934	30956607	0.07187267	3.113016273	No	3466.314552
E101	Digestive	GI_RECTUM	Digestive	GI.RECT.MUC.29	Rectal Mucosa Donor 29	Rectal_Mucosa.Donor_29	PrimaryTissue	6335	29999	0.211173706	2031666	30956607	0.065629479	3.217665413	Digestive	3401.661108
E085	Digestive	GI_INTESTINE	Digestive	GI.S.INT.FET	Fetal Intestine Small	Fetal_Intestine_Small	PrimaryTissue	6375	29999	0.212507084	2079984	30956607	0.067190309	3.162763882	Digestive	3345.000199
E052	Myosat	MUSCLE	Muscle	MUS.SAT	Muscle Satellite Cultured Cells	Muscle_Satellite_Cultured_Cells	PrimaryCulture	7760	29999	0.258675289	2945940	30956607	0.09516353	2.718218724	No	3332.490204
E113	Other	SPLEEN	Other	SPLN				5936	29999	0.197873262	1840854	30956607	0.059465626	3.327523433	No	3311.194135
E023	Mesench	FAT	Mesench	FAT.MSC.DR.ADIP	Mesenchymal Stem Cell Derived Adipocyte Cultured Cells	Mesenchymal_Stem_Cell_Derived_Adipocyte_Cultured_Cells	PrimaryCulture	8700	29999	0.290009667	3660696	30956607	0.118252495	2.452461304	No	3195.463047
E022	iPSC	IPSC	iPSC	IPSC.DF.19.11	iPS DF 19.11 Cells	iPS_DF_19.11_Cell_Line	PrimaryCulture	5978	29999	0.199273309	1919870	30956607	0.062018102	3.213147513	No	3182.596425
E025	Mesench	FAT	Mesench	FAT.ADIP.DR.MSC	Adipose Derived Mesenchymal Stem Cell Cultured Cells	Adipose_Derived_Mesenchymal_Stem_Cell_Cultured_Cells	PrimaryCulture	8265	29999	0.275509184	3368578	30956607	0.108816124	2.531878295	No	3182.420516
E083	Heart	HEART	Heart	HRT.FET	Fetal Heart	Fetal_Heart	PrimaryTissue	6898	29999	0.229940998	2479598	30956607	0.080099153	2.870704489	No	3172.216246
E011	ES-deriv	ESC_DERIVED	ES-deriv	ESDR.CD184.ENDO	hESC Derived CD184+ Endoderm Cultured Cells	hESC_Derived_CD184+_Endoderm_Cultured_Cells	ESCDerived	6829	29999	0.227640921	2461750	30956607	0.079522604	2.862593903	No	3122.444555
E049	Mesench	STROMAL_CONNECTIVE	Mesench	STRM.CHON.MRW.DR.MSC	Mesenchymal Stem Cell Derived Chondrocyte Cultured Cells	Chondrocytes_from_Bone_Marrow_Derived_Mesenchymal_Stem_Cell_Cultured_Cells	PrimaryCulture	7559	29999	0.251975066	2932842	30956607	0.094740422	2.659636314	No	3118.147862
E012	ES-deriv	ESC_DERIVED	ES-deriv	ESDR.CD56.ECTO	hESC Derived CD56+ Ectoderm Cultured Cells	hESC_Derived_CD56+_Ectoderm_Cultured_Cells	ESCDerived	6772	29999	0.225740858	2448460	30956607	0.079093293	2.854108716	No	3078.62925
E059	Epithelial	SKIN	Epithelial	SKIN.PEN.FRSK.MEL.01	Foreskin Melanocyte Primary Cells skin01	Penis_Foreskin_Melanocyte_Primary_Cells_skin01	PrimaryCulture	6021	29999	0.20070669	1993838	30956607	0.064407511	3.116200078	No	3073.328528
E092	Digestive	GI_STOMACH	Digestive	GI.STMC.FET	Fetal Stomach	Fetal_Stomach	PrimaryTissue	6338	29999	0.211273709	2231748	30956607	0.072092785	2.930580506	Digestive	2974.59273
E086	Other	KIDNEY	Other	KID.FET	Fetal Kidney	Fetal_Kidney	PrimaryTissue	6120	29999	0.2040068	2110400	30956607	0.068172846	2.992493527	No	2951.042958
E015	ESC	ESC	ESC	ESC.HUES6	HUES6 Cells	HUES6_Cell_Line	PrimaryCulture	6883	29999	0.229440981	2588074	30956607	0.083603284	2.744401547	No	2947.261065
E061	Epithelial	SKIN	Epithelial	SKIN.PEN.FRSK.MEL.03	Foreskin Melanocyte Primary Cells skin03	Penis_Foreskin_Melanocyte_Primary_Cells_skin03	PrimaryCulture	5801	29999	0.193373112	1935610	30956607	0.062526555	3.092655776	No	2917.030608
E018	iPSC	IPSC	iPSC	IPSC.15b	iPS-15b Cells	iPS-15b_Cell_Line	PrimaryCulture	7069	29999	0.235641188	2732424	30956607	0.088266263	2.669663146	No	2903.833605
E026	Mesench	STROMAL_CONNECTIVE	Mesench	STRM.MRW.MSC	Bone Marrow Derived Cultured Mesenchymal Stem Cells	Bone_Marrow_Derived_Mesenchymal_Stem_Cell_Cultured_Cells	PrimaryCulture	7397	29999	0.246574886	2953196	30956607	0.095397923	2.584698691	No	2896.362557
E080	Other	ADRENAL	Other	ADRL.GLND.FET	Fetal Adrenal Gland	Fetal_Adrenal_Gland	PrimaryTissue	6298	29999	0.209940331	2254214	30956607	0.07281851	2.883062713	No	2880.704071
E007	ES-deriv	ESC_DERIVED	ES-deriv	ESDR.H1.NEUR.PROG	H1 Derived Neuronal Progenitor Cultured Cells	H1_Derived_Neuronal_Progenitor_Cultured_Cells	ESCDerived	5652	29999	0.18840628	1864814	30956607	0.060239612	3.127614428	No	2880.06312
E002	ESC	ESC	ESC	ESC.WA7	ES-WA7 Cells	ES-WA7_Cell_Line	PrimaryCulture	6504	29999	0.216807227	2435608	30956607	0.078678132	2.755622464	No	2781.616566
E088	Other	LUNG	Other	LNG.FET	Fetal Lung	Fetal_Lung	PrimaryTissue	6249	29999	0.208306944	2281578	30956607	0.073702457	2.826322917	No	2768.470303
E014	ESC	ESC	ESC	ESC.HUES48	HUES48 Cells	HUES48_Cell_Line	PrimaryCulture	6650	29999	0.221674056	2560078	30956607	0.082698921	2.680495136	No	2726.089371
E008	ESC	ESC	ESC	ESC.H9	H9 Cells	H9_Cell_Line	PrimaryCulture	6053	29999	0.201773392	2207632	30956607	0.071313759	2.829375373	No	2675.71164
E078	Sm. Muscle	GI_DUODENUM	Other	GI.DUO.SM.MUS	Duodenum Smooth Muscle	Duodenum_Smooth_Muscle	PrimaryTissue	6461	29999	0.215373846	2474732	30956607	0.079941965	2.694127486	No	2660.574955
E095	Heart	HEART	Heart	HRT.VENT.L	Left Ventricle	Left_Ventricle	PrimaryTissue	5296	29999	0.176539218	1789742	30956607	0.05781454	3.053543578	No	2589.895106
E089	Muscle	MUSCLE	Muscle	MUS.TRNK.FET	Fetal Muscle Trunk	Fetal_Muscle_Trunk	PrimaryTissue	5968	29999	0.198939965	2233736	30956607	0.072157004	2.757043045	No	2526.860456
E016	ESC	ESC	ESC	ESC.HUES64	HUES64 Cells	HUES64_Cell_Line	PrimaryCulture	6185	29999	0.206173539	2387722	30956607	0.077131257	2.673021911	No	2499.40431
E066	Other	LIVER	Other	LIV.ADLT	Liver	Adult_Liver	PrimaryTissue	6005	29999	0.200173339	2290886	30956607	0.074003136	2.70493049	No	2466.04935
E024	ESC	ESC	ESC	ESC.4STAR	ES-UCSF4 Cells	4star	PrimaryCulture	5686	29999	0.189539651	2094532	30956607	0.067660257	2.801343926	No	2456.154886
E090	Muscle	MUSCLE_LEG	Muscle	MUS.LEG.FET	Fetal Muscle Leg	Fetal_Muscle_Leg	PrimaryTissue	5746	29999	0.191539718	2165366	30956607	0.069948428	2.738299103	No	2395.247846
E063	Adipose	FAT	Other	FAT.ADIP.NUC	Adipose Nuclei	Adipose_Nuclei	PrimaryTissue	6212	29999	0.207073569	2470798	30956607	0.079814884	2.594422976	No	2386.905862
E116	ENCODE2012	BLOOD	ENCODE2012	BLD.GM12878	GM12878 Lymphoblastoid Cells	GM12878_Lymphoblastoid	PrimaryCulture	5500	29999	0.183339445	2020590	30956607	0.065271688	2.808866289	No	2377.26087
E103	Sm. Muscle	GI_RECTUM	Other	GI.RECT.SM.MUS	Rectal Smooth Muscle	Rectal_Smooth_Muscle	PrimaryTissue	5632	29999	0.187739591	2104702	30956607	0.067988782	2.761331888	No	2374.585503
E105	Heart	HEART	Heart	HRT.VNT.R	Right Ventricle	Right_Ventricle	PrimaryTissue	5286	29999	0.176205874	1902690	30956607	0.061463131	2.86685481	No	2349.793842
E107	Muscle	MUSCLE	Muscle	MUS.SKLT.M	Skeletal Muscle Male	Skeletal_Muscle_Male	PrimaryTissue	6013	29999	0.200440015	2383884	30956607	0.077007277	2.602871097	No	2313.859376
E020	iPSC	IPSC	iPSC	IPSC.20B	iPS-20b Cells	iPS-20b_Cell_Line	PrimaryCulture	6502	29999	0.216740558	2713316	30956607	0.087649011	2.472823761	No	2307.121325
E003	ESC	ESC	ESC	ESC.H1	H1 Cells	H1_Cell_Line	PrimaryCulture	5735	29999	0.191173039	2234322	30956607	0.072175933	2.648708933	No	2261.037829
E065	Heart	VASCULAR	Heart	VAS.AOR	Aorta	Aorta	PrimaryTissue	4593	29999	0.153105104	1534110	30956607	0.049556788	3.089488054	No	2255.35254
E019	iPSC	IPSC	iPSC	IPSC.18	iPS-18 Cells	iPS-18_Cell_Line	PrimaryCulture	6309	29999	0.21030701	2616268	30956607	0.084514043	2.488426822	No	2255.142825
E100	Muscle	MUSCLE	Muscle	MUS.PSOAS	Psoas Muscle	Psoas_Muscle	PrimaryTissue	4893	29999	0.163105437	1733390	30956607	0.055994186	2.912899525	No	2212.801846
E108	Muscle	MUSCLE	Muscle	MUS.SKLT.F	Skeletal Muscle Female	Skeletal_Muscle_Female	PrimaryTissue	5969	29999	0.198973299	2426064	30956607	0.078369829	2.538901787	No	2196.459834
E021	iPSC	IPSC	iPSC	IPSC.DF.6.9	iPS DF 6.9 Cells	iPS_DF_6.9_Cell_Line	PrimaryCulture	4806	29999	0.16020534	1697528	30956607	0.054835725	2.921550487	No	2179.806258
E104	Heart	HEART	Heart	HRT.ATR.R	Right Atrium	Right_Atrium	PrimaryTissue	4533	29999	0.151105037	1604638	30956607	0.051835074	2.915111845	No	2038.579099
E111	Sm. Muscle	GI_STOMACH	Other	GI.STMC.MUS	Stomach Smooth Muscle	Stomach_Smooth_Muscle	PrimaryTissue	5473	29999	0.182439415	2198294	30956607	0.071012111	2.569130999	No	2035.56411
E097	Other	OVARY	Other	OVRY	Ovary	Ovary	PrimaryTissue	4739	29999	0.157971932	1745522	30956607	0.056386089	2.801611798	No	2009.949862
E115	ENCODE2012	BLOOD	ENCODE2012	BLD.DND41.CNCR	Dnd41 TCell Leukemia Cell Line	Dnd41_TCell_Leukemia	CellLine	4891	29999	0.163038768	1845098	30956607	0.059602721	2.735424929	No	2001.124776
E081	Brain	BRAIN	Brain	BRN.FET.M	Fetal Brain Male	Fetal_Brain_Male	PrimaryTissue	5556	29999	0.185206174	2301050	30956607	0.074331467	2.491625444	No	1958.931297
E036	HSC & B-cell	BLOOD	HSC_and_Bcell	BLD.CD34.CC	Primary hematopoietic stem cells short term culture	CD34_Cultured_Cells	PrimaryCell	5545	29999	0.184839495	2296692	30956607	0.074190689	2.491410948	No	1954.291219
E093	Thymus	THYMUS	Other	THYM.FET	Fetal Thymus	Fetal_Thymus	PrimaryTissue	4996	29999	0.166538885	1940704	30956607	0.062691108	2.656499292	No	1950.22577
E087	Other	PANCREAS	Other	PANC.ISLT	Pancreatic Islets	Pancreatic_Islets	PrimaryTissue	4288	29999	0.142938098	1531304	30956607	0.049466145	2.889614683	No	1893.680749
E076	Sm. Muscle	GI_COLON	Other	GI.CLN.SM.MUS	Colon Smooth Muscle	Colon_Smooth_Muscle	PrimaryTissue	5432	29999	0.181072702	2260712	30956607	0.073028417	2.479482786	No	1893.117264
E035	HSC & B-cell	BLOOD	HSC_and_Bcell	BLD.CD34.PC	Primary hematopoietic stem cells	CD34_Primary_Cells	PrimaryCell	5341	29999	0.178039268	2288602	30956607	0.073929355	2.408235093	No	1758.624898
E050	HSC & B-cell	BLOOD	HSC_and_Bcell	BLD.MOB.CD34.PC.F	Primary hematopoietic stem cells G-CSF-mobilized Female	Mobilized_CD34_Primary_Cells_Female	PrimaryCell	5362	29999	0.178739291	2318136	30956607	0.0748834	2.386901371	No	1736.279135
E029	HSC & B-cell	BLOOD	HSC_and_Bcell	BLD.CD14.PC	Primary monocytes from_peripheral_blood	CD14_Primary_Cells	PrimaryCell	4970	29999	0.165672189	2070390	30956607	0.066880392	2.477141431	No	1712.476591
E031	HSC & B-cell	BLOOD	HSC_and_Bcell	BLD.CD19.CPC	Primary B cells from cord blood	CD19_Primary_Cells_Cord_BI	PrimaryCell	5068	29999	0.168938965	2183578	30956607	0.070536736	2.39504938	No	1641.622756
E009	ES-deriv	ESC_DERIVED	ES-deriv	ESDR.H9.NEUR.PROG	H9 Derived Neuronal Progenitor Cultured Cells	H9_Derived_Neuronal_Progenitor_Cultured_Cells	ESCDerived	4678	29999	0.155938531	1932264	30956607	0.062418469	2.49827551	No	1627.549433
E112	Thymus	THYMUS	Other	THYM	Thymus	Thymus	PrimaryTissue	4355	29999	0.145171506	1726486	30956607	0.055771164	2.602985052	No	1620.530049
E051	HSC & B-cell	BLOOD	HSC_and_Bcell	BLD.MOB.CD34.PC.M	Primary hematopoietic stem cells G-CSF-mobilized Male	Mobilized_CD34_Primary_Cells_Male	PrimaryCell	5222	29999	0.174072469	2304008	30956607	0.07442702	2.338834333	No	1619.742122
E124	ENCODE2012	BLOOD	ENCODE2012	BLD.CD14.MONO	Monocytes-CD14+ RO01746 Primary Cells	Monocytes-CD14+_RO01746	PrimaryCell	5010	29999	0.167005567	2185146	30956607	0.070587387	2.365940628	No	1582.636376
E030	HSC & B-cell	BLOOD	HSC_and_Bcell	BLD.CD15.PC	Primary neutrophils from_peripheral_blood	CD15_Primary_Cells	PrimaryCell	5287	29999	0.176239208	2402324	30956607	0.077602949	2.271037503	No	1546.882268
E010	ES-deriv	ESC_DERIVED	ES-deriv	ESDR.H9.NEUR	H9 Derived Neuron Cultured Cells	H9_Derived_Neuron_Cultured_Cells	ESCDerived	4366	29999	0.145538185	1824610	30956607	0.058940891	2.469222675	No	1477.013789
E062	Blood & T-cell	BLOOD	Blood_and_Tcell	BLD.PER.MONUC.PC	Primary mononuclear cells from_peripheral_blood	Peripheral_Blood_Mononuclear_Primary_Cells	PrimaryCell	4217	29999	0.140571352	1746444	30956607	0.056415873	2.491698624	No	1446.492934
E073	Brain	BRAIN	Brain	BRN.DL.PRFRNTL.CRTX	Brain_Dorsolateral_Prefrontal_Cortex	Brain_Mid_Frontal_Lobe	PrimaryTissue	5610	29999	0.187006234	2772118	30956607	0.089548509	2.088323253	No	1374.865691
E033	Blood & T-cell	BLOOD	Blood_and_Tcell	BLD.CD3.CPC	Primary T cells from cord blood	CD3_Primary_Cells_Cord_BI	PrimaryCell	4369	29999	0.145638188	1907000	30956607	0.061602358	2.364165783	No	1359.647921
E046	HSC & B-cell	BLOOD	HSC_and_Bcell	BLD.CD56.PC	Primary Natural Killer cells from_peripheral_blood	CD56_Primary_Cells	PrimaryCell	4034	29999	0.134471149	1683654	30956607	0.05438755	2.472461987	No	1358.935441
E053	Neurosph	BRAIN	Brain	BRN.CRTX.DR.NRSPHR	Cortex derived primary cultured neurospheres	Neurosphere_Cultured_Cells_Cortex_Derived	PrimaryCulture	4298	29999	0.143271442	1891246	30956607	0.061093453	2.345119427	No	1314.28772
E032	HSC & B-cell	BLOOD	HSC_and_Bcell	BLD.CD19.PPC	Primary B cells from peripheral blood	CD19_Primary_Cells_Peripheral_UW	PrimaryCell	4110	29999	0.137004567	1796312	30956607	0.058026773	2.361057841	No	1268.913165
E054	Neurosph	BRAIN	Brain	BRN.GANGEM.DR.NRSPHR	Ganglion Eminence derived primary cultured neurospheres	Neurosphere_Cultured_Cells_Ganglionic_Eminence_Derived	PrimaryCulture	4556	29999	0.151871729	2111008	30956607	0.068192486	2.227103559	No	1259.003301
E067	Brain	BRAIN	Brain	BRN.ANG.GYR	Brain Angular Gyrus	Brain_Angular_Gyrus	PrimaryTissue	5210	29999	0.173672456	2700766	30956607	0.087243605	1.990661153	No	1126.059968
E069	Brain	BRAIN	Brain	BRN.CING.GYR	Brain Cingulate Gyrus	Brain_Cingulate_Gyrus	PrimaryTissue	5326	29999	0.177539251	2807424	30956607	0.090689009	1.9576711	No	1106.04781
E034	Blood & T-cell	BLOOD	Blood_and_Tcell	BLD.CD3.PPC	Primary T cells from_peripheral_blood	CD3_Primary_Cells_Peripheral_UW	PrimaryCell	3652	29999	0.121737391	1604610	30956607	0.051834169	2.348593476	No	1105.341405
E071	Brain	BRAIN	Brain	BRN.HIPP.MID	Brain Hippocampus Middle	Brain_Hippocampus_Middle	PrimaryTissue	5149	29999	0.171639055	2681526	30956607	0.08662209	1.98146979	No	1098.321316
E072	Brain	BRAIN	Brain	BRN.INF.TMP	Brain Inferior Temporal Lobe	Brain_Inferior_Temporal_Lobe	PrimaryTissue	5332	29999	0.177739258	2833008	30956607	0.091515456	1.942177487	No	1084.744201
E048	Blood & T-cell	BLOOD	Blood_and_Tcell	BLD.CD8.MPC	Primary T CD8+ memory cells from peripheral blood	CD8_Memory_Primary_Cells	PrimaryCell	3735	29999	0.12450415	1678872	30956607	0.054233075	2.295723584	No	1081.198063
E074	Brain	BRAIN	Brain	BRN.SUB.NIG	Brain Substantia Nigra	Brain_Substantia_Nigra	PrimaryTissue	5205	29999	0.173505784	2744966	30956607	0.08867141	1.956727461	No	1076.443776
E038	Blood & T-cell	BLOOD	Blood_and_Tcell	BLD.CD4.NPC	Primary T helper naive cells from peripheral blood	CD4_Naive_Primary_Cells	PrimaryCell	3693	29999	0.123104103	1657098	30956607	0.053529704	2.299734446	No	1071.969893
E037	Blood & T-cell	BLOOD	Blood_and_Tcell	BLD.CD4.MPC	Primary T helper memory cells from peripheral blood 2	CD4_Memory_Primary_Cells	PrimaryCell	3686	29999	0.122870762	1662558	30956607	0.05370608	2.287837117	No	1058.391451
E068	Brain	BRAIN	Brain	BRN.ANT.CAUD	Brain Anterior Caudate	Brain_Anterior_Caudate	PrimaryTissue	5154	29999	0.171805727	2759456	30956607	0.089139485	1.927380747	No	1023.153759
E044	Blood & T-cell	BLOOD	Blood_and_Tcell	BLD.CD4.CD25.CD127M.TREGPC	Primary T regulatory cells from_peripheral_blood	CD4+_CD25+_CD127-_Treg_Primary_Cells	PrimaryCell	3514	29999	0.117137238	1592250	30956607	0.0514349	2.277388249	No	995.9531721
E070	Brain	BRAIN	Brain	BRN.GRM.MTRX	Brain Germinal Matrix	Brain_Germinal_Matrix	PrimaryTissue	4083	29999	0.136104537	1998200	30956607	0.064548418	2.108565037	No	988.6187276
E042	Blood & T-cell	BLOOD	Blood_and_Tcell	BLD.CD4.CD25M.IL17P.PL.TPC	Primary T helper 17 cells PMA-I stimulated	CD4+_CD25-_IL17+_PMA-Ionomcyin_stimulated_Th17_Primary_Cells	PrimaryCell	3545	29999	0.118170606	1630634	30956607	0.05267483	2.243397966	No	974.008197
E047	Blood & T-cell	BLOOD	Blood_and_Tcell	BLD.CD8.NPC	Primary T CD8+ naive cells from peripheral blood	CD8_Naive_Primary_Cells	PrimaryCell	3477	29999	0.115903863	1594078	30956607	0.051493951	2.250824835	No	960.7235124
E040	Blood & T-cell	BLOOD	Blood_and_Tcell	BLD.CD4.CD25M.CD45RO.MPC	Primary T helper memory cells from peripheral blood 1	CD4+_CD25-_CD45RO+_Memory_Primary_Cells	PrimaryCell	3534	29999	0.117803927	1634396	30956607	0.052796355	2.23128903	No	959.6016141
E041	Blood & T-cell	BLOOD	Blood_and_Tcell	BLD.CD4.CD25M.IL17M.PL.TPC	Primary T helper cells PMA-I stimulated	CD4+_CD25-_IL17-_PMA-Ionomycin_stimulated_MACS_purified_Th_Primary_Cells	PrimaryCell	3483	29999	0.11610387	1624548	30956607	0.052478232	2.212419626	No	927.6027163
E045	Blood & T-cell	BLOOD	Blood_and_Tcell	BLD.CD4.CD25I.CD127.TMEMPC	Primary T cells effector/memory enriched from peripheral blood	CD4+_CD25int_CD127+_Tmem_Primary_Cells	PrimaryCell	3441	29999	0.114703823	1603110	30956607	0.051785714	2.214970391	No	917.9211294
E043	Blood & T-cell	BLOOD	Blood_and_Tcell	BLD.CD4.CD25M.TPC	Primary T helper cells from_peripheral_blood	CD4+_CD25-_Th_Primary_Cells	PrimaryCell	3349	29999	0.111637055	1577600	30956607	0.050961657	2.190608789	No	870.4010697
E039	Blood & T-cell	BLOOD	Blood_and_Tcell	BLD.CD4.CD25M.CD45RA.NPC	Primary T helper naive cells from_peripheral_blood	CD4+_CD25-_CD45RA+_Naive_Primary_Cells	PrimaryCell	3378	29999	0.112603753	1601370	30956607	0.051729506	2.176779971	No	866.2329455
E082	Brain	BRAIN	Brain	BRN.FET.F	Fetal Brain Female	Fetal_Brain_Female	PrimaryTissue	3495	29999	0.116503883	1849794	30956607	0.059754417	1.949711662	No	688.4979902
