# Supplementary material for: Analysis of zebrafish periderm enhancers facilitates identification of a regulatory variant near human KRT8/18
Source: eLife. 2020 Feb 7;9:e51325. doi: 10.7554/eLife.51325 (PMC7039683; doi:10.7554/eLife.51325)
Supplement: Figure 5—source data 2. [file elife-51325-fig5-data2.xlsx]

## Sheet: Sheet1
# Term Name	-LOG(Binom FDR Q-Val )
TS23_oral epithelium	74.4771
TS23_oesophagus	67.8419
TS5_inner cell mass	67.7266
TS4_compacted morula	64.979
TS4_second polar body	63.6898
TS4_zona pellucida	63.6898
TS23_respiratory tract	58.6878
TS23_pharyngo-tympanic tube	55.1278
TS23_trachea	52.593
TS23_lower respiratory tract	52.3612
