# Supplementary material for: Analysis of zebrafish periderm enhancers facilitates identification of a regulatory variant near human KRT8/18
Source: eLife. 2020 Feb 7;9:e51325. doi: 10.7554/eLife.51325 (PMC7039683; doi:10.7554/eLife.51325)
Supplement: Figure 6—source data 1. [file elife-51325-fig6-data1.xlsx]

## Sheet: Sheet1
SNP1-nonrisk	SNP1-risk	SNP2-nonrisk	SNP2-risk
2.357	1.90414	2.87246	1.83052
2.47366	1.74569	3.26771	2.11503
2.56626	1.68368	2.15541	1.86679
2.07667	2.08572	1.88941	1.32714
2.11618	2.54582	2.11954	1.4356
2.53258	2.30548	2.25784	1.4515
