# Supplementary material for: Analysis of zebrafish periderm enhancers facilitates identification of a regulatory variant near human KRT8/18
Source: eLife. 2020 Feb 7;9:e51325. doi: 10.7554/eLife.51325 (PMC7039683; doi:10.7554/eLife.51325)
Supplement: Figure 6—source data 2. [file elife-51325-fig6-data2.xlsx]

## Sheet: Sheet1
Gene	Control			KO
	Replicate 1	Replicate 2	Replicate 3	Replicate 1	Replicate 2	Replicate 3
KRT18	1.01035	0.94966	1.03999	0.716797	0.69306	0.642191
KRT8	0.0127639	0.0124769	0.0128717	0.0074647	0.00669598	0.00715296
